# Supplementary material for: Distribution of Porphyromonas gingivalis fimA and mfa1 fimbrial genotypes in subgingival plaques
Source: PeerJ. 2018 Aug 27;6:e5581. doi: 10.7717/peerj.5581 (PMC6118206; doi:10.7717/peerj.5581)
Supplement: Supplemental Information 2 [file peerj-06-5581-s002.xlsx]

## Sheet: Data 1
Data 1 Identification for black-pigmented colony on a blood agar plate.
															* Band intensity in PCR; 0, negative; 1, faint positive; 2, strong positive
					16S rRNA sequencing										FimA					Mfa1
Patient	Isolation				27F primer					1492R primer					PCR	Sequencing				PCR
#	Clone#	Culture days	Picture			Result of BLAST	E-value	Ident (%)			Organism	E-value	Ident (%)		Band	F	R	type		53K	75K
1	4	7			CATCGGAAAGCTTCACGCTTGCAGTCGAGGGGCAGCATTATTTTAGCTTGCTAAGATAGATGGCGACCGGCGCACGGGTGCGTAACGCGTATGCAACCTGCCTGTAATTAGGGAATAACCCGGTGAAAGTCGGACTAATACCCTATATTCTTCTTTCTCCGCATGGAGGAGGACGGAAAGATTTATTGATTACAGATGGGCATGCGTCCCATTAGCTGGTTGGTAAGGTAACGGCTTACCAAGGCAACGATGGGTAGGGGGACTGAGAGGTTGACCCCCCACACTGGTACTGAGACACGGACCAGACTCCTACGGGAGGCAGCAGTGAGGAATATTGGTCAATGGGCGAGAGCCTGAACCAGCCAAGTCGCGTGAAGGACGACGGTTCTATGGATTGTA…	Porphyromonas endodontalis	0	96		CAGGGGGAATACCTCTACACGCCCCTTGCGGTTACGCTCTTCAGGTACTCCCAACTTCCATGGCTTGACGGGCGGTGTGTACAAGGCCCGGGAACGTATTCACCGCGCCATGGCTGATGCGCGATTACTAGCGAATCCAGCTTCACGGAGTCGAGTTGCAGACTCCGATCCGAACTGGGACAGGGTTTGGAGATCCGCTTCATGTCACCATGTCGCTTCCCTTTGTCCCTGCCATTGTAACACGTGTGTCGCCCCGGATGTAAGGGCCGTGCTGATTTGACGTCATCCGCCCCTTCCTCTCGTCTTACGACGGCTGTCTCGATAGAGTCCTCAGCATGACCTGTTAGTAACTATCGACGCGGGTTGCGCTCGTTATGGCACTTAAGCCGACACCTCACG…	Porphyromonas endodontalis	0	97		0					1	1
2	1	7			AATGGCCGGGCTACACGCTTGCAGTCGAGGGGCAGCATGATCTTAGCTTGCTAAGGTCGATGGCGACCGGCGCACGGGTGCGTAACGCGTATGCAACTTGCCTTACAGAGGGGGATAACCCGTTGAAAGACGGACTAAAACCGCATACACTTGTATTATTGCATGATATTACAAGGAAATATTTATAGCTGTAAGATAGGCATGCGTCCCATTAGCTGGTTGGTGAGGTAACGGCTCACCAAGGCGACGATGGGTAGGGGAACTGAGAGGTTTATCCCCCACACTGGTACTGAGACACGGACCAGACTCCTACGGGAGGCAGCAGTGAGGAATATTGGTCAATGGGCGAGAGCCTGAACCAGCCAAGTCGCGTGAAGGAAGACAGTCCTAAGGATTGTA…	Porphyromonas gingivalis	0	97		GGGCCGGCATCACCTCAGTCACGCCCCTTGCGGTTACGCCCTTCAGGTACCCCCGACTCCCATGGCTTGACGGGCGGTGTGTACAAGGCCCGGGAACGTATTCACCGCGCCATGGCTGATGCGCGATTACTAGCGAATCCAGCTTCACGGAGTCGAGTTGCAGACTCCGATCCGAACTGGGGAAGGGTTTAGAGATTCGCATCCGGTCGCCCGGTAGCTGCCCTTTGTCCCTCCCATTGTAACACGTGTGTCGCCCCGGATGTAAGGGCCGTGCTGATTTGACGTCATCCACACCTTCCTCACGCCTTACGACGGCAGTCTCGGTAGAGTCCTCAGCGAAAACTGTTAGCAACTACCGATGTGGGTTGCGCTCGTTATGGCACTTAAGCCGACACCTCA…	Porphyromonas gingivalis	0	98		2	>2-1F NNNNNGNNNNNATGCCACCATCAGCGTGGTATTGAAGACCAGCAATCCGAATCGTGCTTTTGGAGTTGGCGATGACGAATCAAAGGTGGCTAAGTTGACCGTAATGGTTTATAATGGAGAACAGCAGGAAGCCATCAAATCAGCCGAAAATGCGACTAAGGTTGAAGACATCAAATGTAGTGCAGGCCAACGTACGCTGGTCGTAATGGCCAATACGGGTGCAATGGAACTGGTTGGCAAGACTCTTGCAGAGGTAAAAGCATTGACAACTGAACTGACTGCAGAAAATCAAGAGGCTGCAGGTTTGATCATGACAGCAGAGCCAAAAACAATCGTTTTGAAGGCAGGCAAGAACTACATTGGATACAGTGGAAACGGAGAGGGTAATCACAT…	>2-1R, complement NNNNNNATGCCNNNNCNNTNNGNNNTGNATTNNANGNCNNNNNNNNCNNATCNNNCTTNNNAGNNNNNGATGNNGANNCNANGNNNGNNANTNNCNNNNNGNTTATNATGNNANAGCNNNAGCCATCAAATCNNNNAAAATGCGNNTNANGNNNAAGNCATCAAATGTAGTGCAGGCCNAACGTACGCTGGTCGTAATGGNCCAATACGGGTGCAATGGAACTGGTTGGNCAAGACTCTTGCAGAGGTAAAAGCATTGACAACTGAACTGACTGCAGAAAATCAAGAGGCTGCAGGTTTGATCATGACAGCAGAGCCAAAAACAATCGTTTTGAAGGCAGGCAAGAACTACANNGATACAGTGGAAACGGAGAGGGTAATC…	Ib		2	0
	2	7			TAGGGCAAAGGCTTACGCTTGCAGTCGAGGGGCAGCATGATCTTAGCTTGCTAAGGTCGATGGCGACCGGCGCACGGGTGCGTAACGCGTATGCAACTTGCCTTACAGAGGGGGATAACCCGTTGAAAGACGGACTAAAACCGCATACACTTGTATTATTGCATGATATTACAAGGAAATATTTATAGCTGTAAGATAGGCATGCGTCCCATTAGCTGGTTGGTGAGGTAACGGCTCACCAAGGCGACGATGGGTAGGGGAACTGAGAGGTTTATCCCCCACACTGGTACTGAGACACGGACCAGACTCCTACGGGAGGCAGCAGTGAGGAATATTGGTCAATGGGCGAGAGCCTGAACCAGCCAAGTCGCGTGAAGGAAGACAGTCCTAAGGATTGTA…	Porphyromonas gingivalis	0	96		TCGGGGCATCACTCAGTCACGCCCCTTGCGGTTACGCCCTTCAGGTACCCCCGACTCCCATGGCTTGACGGGCGGTGTGTACAAGGCCCGGGAACGTATTCACCGCGCCATGGCTGATGCGCGATTACTAGCGAATCCAGCTTCACGGAGTCGAGTTGCAGACTCCGATCCGAACTGGGGAAGGGTTTAGAGATTCGCATCCGGTCGCCCGGTAGCTGCCCTTTGTCCCTCCCATTGTAACACGTGTGTCGCCCCGGATGTAAGGGCCGTGCTGATTTGACGTCATCCACACCTTCCTCACGCCTTACGACGGCAGTCTCGGTAGAGTCCTCAGCGAAAACTGTTAGCAACTACCGATGTGGGTTGCGCTCGTTATGGCACTTAAGCCGACACCTCACG…	Porphyromonas gingivalis	0	98		2	>2-2F ANNNNNNNNAANGNNNGNCNCCATCAGCGTGGTATTGAAGACCAGCAATCCGAATCGTGCTTTTGGAGTTGGCGATGACGAATCAAAGGTGGCTAAGTTGACCGTAATGGTTTATAATGGAGAACAGCAGGAAGCCATCAAATCAGCCGAAAATGCGACTAAGGTTGAAGACATCAAATGTAGTGCAGGCCAACGTACGCTGGTCGTAATGGCCAATACGGGTGCAATGGAACTGGTTGGCAAGACTCTTGCAGAGGTAAAAGCATTGACAACTGAACTGACTGCAGAAAATCAAGAGGCTGCAGGTTTGATCATGACAGCAGAGCCAAAAACAATCGTTTTGAAGGCAGGCAAGAACTACATTGGATACAGTGGAAACGGAGAGGGTAATCA…	>2-2R, complement NNNNNNNNNNTNGANANAGACAACTATGAAAGTTTTTTAGTCGTTTGACGGGTCGATTACCAAGTAGCATTCTGACCAACGAGAACCCACTCAGCTACAGTGCACTGTACATTCAAGTGAGCAGACTCTGTGATAGGATTCTCTGGGTTATTCGTTCCGGGGCCTGTGATTGTCAGCTTAATATCATACTTATGGTTACGCTCAATTTTATTCTTAGGCGTATAACCATTGTCATAAGTATAGTTGTTGCTGTTGAAGTTTACCAATACAGGGTAATAGGTCTTGCCTTCTGCATCCACCCAATTGGCGGCCTGAGCAGCTGCTAAATCGGCTCCCGCCAAGTCGGCTCCGTTTTTCTGAAGTTTGCCATAAACACACAGG…	Ib		2	0
	3	7			CACGGGATGGGCCTTTACACATGCAAGTCGAGGGGCAGCATGATCTTAGCTTGCTAAGGTCGATGGCGACCGGCGCACGGGTGCGTAACGCGTATGCAACTTGCCTTACAGAGGGGGATAACCCGTTGAAAGACGGACTAAAACCGCATACACTTGTATTATTGCATGATATTACAAGGAAATATTTATAGCTGTAAGATAGGCATGCGTCCCATTAGCTGGTTGGTGAGGTAACGGCTCACCAAGGCGACGATGGGTAGGGGAACTGAGAGGTTTATCCCCCACACTGGTACTGAGACACGGACCAGACTCCTACGGGAGGCAGCAGTGAGGAATATTGGTCAATGGGCGAGAGCCTGAACCAGCCAAGTCGCGTGAAGGAAGACAGTCCTAAGGATT…	Porphyromonas gingivalis	0	97		CCGGGGGCATTACCTAGTCACGCCCCTTGCGGTTACGCCCTTCAGGTACCCCCGACTCCCATGGCTTGACGGGCGGTGTGTACAAGGCCCGGGAACGTATTCACCGCGCCATGGCTGATGCGCGATTACTAGCGAATCCAGCTTCACGGAGTCGAGTTGCAGACTCCGATCCGAACTGGGGAAGGGTTTAGAGATTCGCATCCGGTCGCCCGGTAGCTGCCCTTTGTCCCTCCCATTGTAACACGTGTGTCGCCCCGGATGTAAGGGCCGTGCTGATTTGACGTCATCCACACCTTCCTCACGCCTTACGACGGCAGTCTCGGTAGAGTCCTCAGCGAAAACTGTTAGCAACTACCGATGTGGGTTGCGCTCGTTATGGCACTTAAGCCGACACCTCAC…	Porphyromonas gingivalis	0	98		2	>2-3F NNNANNNNNNANGCCACCATCAGCGTGGTANTGAAGACCAGCAATCCGAATCGTGCTTTTGGAGTTGGCGATGACGAATCAAAGGTGGCTAAGTTGACCGTAATGGTTTATAATGGAGAACAGCAGGAAGCCATCAAATCAGCCGAAAATGCGACTAAGGTTGAAGACATCAAATGTAGTGCAGGCCAACGTACGCTGGTCGTAATGGCCAATACGGGTGCAATGGAACTGGTTGGCAAGACTCTTGCAGAGGTAAAAGCATTGACAACTGAACTGACTGCAGAAAATCAAGAGGCTGCAGGTTTGATCATGACAGCAGAGCCAAAAACAATCGTTTTGAAGGCAGGCAAGAACTACATTGGATACAGTGGAAACGGAGAGGGTAATCACATT…	>2-3R, complement GNNNNNNNNNNCANNNNNNNNNNNTCGANNNGACAACTATGAAAGTTTTTTAGTCGTTTGACGGGTCGATTACCAAGTAGCATTCTGACCAACGAGAACCCACTCAGCTACAGTGCACTGTACATTCAAGTGAGCAGACTCTGTGATAGGATTCTCTGGGTTATTCGTTCCGGGGCCTGTGATTGTCAGCTTAATATCATACTTATGGTTACGCTCAATTTTATTCTTAGGCGTATAACCATTGTCATAAGTATAGTTGTTGCTGTTGAAGTTTACCAATACAGGGTAATAGGTCTTGCCTTCTGCATCCACCCAATTGGCGGCCTGAGCAGCTGCTAAATCGGCTCCCGCCAAGTCGGCTCCGTTTTTCTGAAGTTTGCC…	Ib		2	0
3	1	7			AGGGCGGGCCTTCCATGCAGTCGTGCGGCAGCACGGTTTTCGGTCTGGTGTTCAGGACGAACGGGTGAGTAATGTAGAGTAACGTGCCTCCTCCTGCCCCATACTTGGGGAACCCCGTTTAATAACGGACACGCCCTACAGGGGAAAGCAGGGGATCGTCCGACCTTGAACTATTGTTTTCCCCGATAGGATGGTAACTCGTTGGAGGGGTAAGGGGTCAGCGCGGCGACCATCCGTAGCTGGTTTGAGAGGAGGATCAGACACGCTGGGACTGAGACATGGACCTGACTCCTACGGGAGGTCCTATGGGAAATTTTGGACAATGGGGGAAACCCTGATCCAGCCATCCCGCGTGTGCGATGAAGGCCTTCGGGTTGTAAAGCACTTTTGGTAGGAAAG…	Achromobacter sp.	0	82		TTGAATCTTGCGTGGGCACGCTCCTCGCTTGCACTAAGGTTAACTACTTCCGGTTTTCCGACTCCCATGGTGTGACGGGCGGTGTGTACAAAACCCGGGAACGTATTCTGCGCGACATGCTGATCCGCGATTACTAGCGATTCCGACTTCACGGTTGCGAGTTGCAGACTGCGAGCCGGACTACGATCGGATTGCTGGGATTGTGTCCTCCTCCGGCCTTGTGTACCCTCTGTTGCGACCATTGTGTGACCTGTGAAGCCCTGGCCGTGCTGACCATGAGGACTTGACGTCTTCCCCACCTTCCTCCGGGTTGTCGCCGGCAGACTGCTTAGAATGCCCTTACGGAAACTGTAATGAGGGGGGGCGCTCTCTATGCGAGTTATACCCACACCTCTCAGG…	Achromobacter sp.	4e-120	78		0					0	0
	2	7			TTAGTACAGGGCTATACACTTGCAAGTCGTGGGGAACGGCATTATGTGCTTGCACATTCTGGACGTCGACCGGCGCACGGGTGAGTATCGCGTATCCAACCTGCCCCTTACTTGGGGATACCCCGTTGAAAGACGGCCTAATACCCGATGTGTTTCATTGACGGCATCCGATATGAAACAAAGGTTTTCCGGTAAGGGATGGGGATGCGTCTGATTAGCTTGGTGGCGGGGCAACGGCCCACCAAGGCAACGATCAGTAGGGGTTCTGAAAGGAAGGTCCCCCACATTGGAACTGAAACACGGTCCAAACTCCTACGGGAGGCAGCAGTGAGGAATATTGGTCAATGGACGCAAGTCTGAACCAGCCAAGTAGCGTGCAGGATGACGGCCCTATGGGTT…	Prevotella nigrescens	0 0	95 95		TGACGGGCACGAACTCAGTGCTCGCTCCTCGCGGTCACGAACTTCAGGCACCCCCGGCTTTCATGGCTTGACGGGCGGTGTGTACAAGGCCCGGGAACGTATTCACCGCGCCATGGCTGATGCGCGATTACTAGCGAATCCAGCTTCGTGGGGTCGGGTTGCAGACCCCAGTCCGAACTGGGACCGGATTTCAAGATTGGATGCAACTTGCATTGCACCGTCCCTCTGTACCGGCCATTGTAACACGTGTGTAGCCCCGGACGTAAGGGCCGTGCTGATTTGACGTCATCCCCACCTTCCTCGCACCTTGCGGTGGCAGTGTCCCCAGAGTGCCCGGCATCACCCGATGGCAACTGGGAAAGGGGGTTGCGCTCGTTATGGCACTTAAGCCGACACCTC…	Prevotella nigrescens	0 0	96 96		1					1	0
	3	7			TTTGGTTCAGGCTATCCGCTTGCAGTCGTGGGGAACGGCATTATGTGCTTGCACATTCTGGACGTCGACCGGCGCACGGGTGAGTATCGCGTATCCAACCTGCCCCTTACTTGGGGATACCCCGTTGAAAGACGGCCTAATACCCGATGTGTTTCATTGACGGCATCCGATATGAAACAAAGGTTTTCCGGTAAGGGATGGGGATGCGTCTGATTAGCTTGTTGGCGGGGCAACGGCCCACCAAGGCAACGATCAGTAGGGGTTCTGAAAGGAAGGTCCCCCACATTGGAACTGAAACACGGTCCAAACTCCTACGGGAGGCAGCAGTGAGGAATATTGGTCAATGGACGCAAGTCTGAACCAGCCAAGTAGCGTGCAGGATGACGGCCCTATGGGTTG…	Prevotella nigrescens	0 0	95 95		AGGAACGGGGCATTGGACTCAGTGCACGCTCCTCGCGGTCACGAACTTCAGGCACCCCCGGCTTTCATGGCTTGACGGGCGGTGTGTACAAGGCCCGGGAACGTATTCACCGCGCCATGGCTGATGCGCGATTACTAGCGAATCCAGCTTCGTGGGGTCGGGTTGCAGACCCCAGTCCGAACTGGGACCGGATTTCAAGATTGGATGCAACTTGCATTGCACCGTCCCTCTGTACCGGCCATTGTAACACGTGTGTAGCCCCGGACGTAAGGGCCGTGCTGATTTGACGTCATCCCCACCTTCCTCGCACCTTGCGGTGGCAGTGTCCCCAGAGTGCCCGGCATCACCCGATGGCAACTGGGAAAGGGGGTTGCGCTCGTTATGGCACTTAAGCCGACA…	Prevotella nigrescens	0 0	97 97		1					1	0
4	1	7			TCCTTGTCCACGCTTTAGCTTGCAGTCGTGGGGAACGGCATTATGTGCTTGCACATTCTGGACGTCGACCGGCGCACGGGTGAGTATCGCGTATCCAACCTGCCCCTTACTTGGGGATACCCCGTTGAAAGACGGCCTAATACCCGATGTGTTTCATTGACGGCATCCGATATGAAACAAAGGTTTTTCCGGTAAGGGATGGGGATGCGTCTGATTAGCTTGTTGGCGGGGCAACGGCCCACCAAGGCGACGATCAGTAGGGGTTCTGAGAGGAAGGTCCCCCACATTGGAACTGAGACACGGTCCAAACTCCTACGGGAGGCAGCAGTGAGGAATATTGGTCAATGGACGCAAGTCTGAACCAGCCAAGTAGCGTGCAGGATGACGGCCCTATGGGTT…	Prevotella nigrescens	0 0	96 96		CGGACCGGTCATCGACCCTCCTATGCCCGCTCCTCGCGGTCACGACTTCAGGCACCCCCGGCTTTCATGGCTTGACGGGGGGGTGAACAAGGCCCGGGAACGTATTCACCGCGCCCTGGCTGATGCGCGATTACTAGCGAATCCAGCTTCGTGGGGTCGGGTTGCAGACCCCAGTCCGAACTGGGACCGGATTTCAAGATTGGATGCAACTTGCATTGCACCGTCCCTCTGTACCGGCCATTGTAACACGTGTGTAGCCCCGGACGTAAGGGCCGTGCTGATTTGACGTCATCCCCACCTTCCTCGCACCTTGCGGTGGCAGTGTCCCCAGAGTGCCCGGCATAACCCGATGGCAACTGGGAAAGGGGGTTGCGCTCGTTATGGCACTTAAGCCGACAC…	Prevotella nigrescens	0 0	94 94		0					0	0
	3	7			AAGGTACAGGCTATACGTAGCAGTCGTGGGGAACGGCATTATGTGCTTGCACATTCTGGACGTCGACCGGCGCACGGGTGAGTATCGCGTATCCAACCTGCCCCTTACTTGGGGATACCCCGTTGAAAGACGGCCTAATACCCGATGTGTTTCATTGACGGCATCCGATATGAAACAAAGGTTTTTCCGGTAAGGGATGGGGATGCGTCTGATTAGCTTGTTGGCGGGGCAACGGCCCACCAAGGCGACGATCAGTAGGGGTTCTGAGAGGAAGGTCCCCCACATTGGAACTGATACACGGTCCAAACTCCTACGGGAGGCAGCAGTGAGGAATATTGGTCAATGGACGCAAGTCTGAACCAGCCAAGTAGCGTGCAGGATGACGGCCCTATGGGTTGT…	Prevotella nigrescens	0 0	95 94		TGAACCAGTCATCGACCTCATTGCACGCTCCTCGCGGTCACGAACTTCAGGCACCCCCGGCTTTCATGGCTTGACGGGCGGTGTGTACAAGGCCCGGGAACGTATTCACCGCGCCATGGCTGATGCGCGATTACTAGCGAATCCAGCTTCGTGGGGTCGGGTTGCAAACCCCAGTCCGAACTGGGACCGGATTTCAAGATTGGATGCAACTTGCATTGCACCGTCCCTCTGTACCGGCCATTGTAACACGTGTGTAGCCCCGGACGTAAGGGCCGTGCTGATTTGACGTCATCCCCACCTTCCTCGCACCTTGCGGTGGCAGTGTCCCCAGAGTGCCCGGAATAACCCGATGGAAACTGGGAAAGGGGGTTGCGCTCGTTATGGCACTTAAGCCGACAC…	Prevotella nigrescens	0 0	95 94		0					0	0
	4	7			ATGGTCAGGGGCTATACGCTTGCAGTCGTGGGGAACGGCATTATGTGCTTGCACATTCTGGACGTCGACCGGCGCACGGGTGAGTATCGCGTATCCAACCTGCCCCTTACTTGGGGATACCCCGTTGAAAGACGGCCTAATACCCGATGTGTTTCATTGACGGCATCCGATATGAAACAAAGGTTTTTCCGGTAAGGGATGGGGATGCGTCTGATTAGCTTGTTGGCGGGGCAACGGCCCACCAAGGCGACGATCAGTAGGGGTTCTGAGAGGAAGGTCCCCCACATTGGAACTGAGACACGGTCCAAACTCCTACGGGAGGCAGCAGTGAGGAATATTGGTCAATGGACGCAAGTCTGAACCAGCCAAGTAGCGTGCAGGATGACGGCCCTATGGGTT…	Prevotella nigrescens	0 0	97 96		CGGGGGCTTGACTAGTGCACGCTCCTCGCGGTCACGAACTTCAGGCACCCCCGGCTTTCATGGCTTGACGGGCGGTGTGTACAAGGCCCGGGAACGTATTCACCGCGCCATGGCTGATGCGCGATTACTAGCGAATCCAGCTTCGTGGGGTCGGGTTGCAGACCCCAGTCCGAACTGGGACCGGATTTCAAGATTGGATGCAACTTGCATTGCACCGTCCCTCTGTACCGGCCATTGTAACACGTGTGTAGCCCCGGACGTAAGGGCCGTGCTGATTTGACGTCATCCCCACCTTCCTCGCACCTTGCGGTGGCAGTGTCCCCAGAGTGCCCGGCATAACCCGATGGCAACTGGGAAAGGGGGTTGCGCTCGTTATGGCACTTAAGCCGACACCTCACG…	Prevotella nigrescens	0 0	97 97		0					1	0
	5	7			AATTGCTAAGGGGCTATCAGCTAAGCAAGTCGTGGGGAACGGCATTATGTGCTTGCACATTCTGGACGTCGACCGGCGCACGGGTGAGTATCGCGTATCCAACCTGCCCCTTACTTGGGGATACCCCGTTGAAAGACGGCCTAATACCCGATGTGTTTCATTGACGGCATCCGATATGAAACAAAGGTTTTTCCGGTAAGGGATGGGGATGCGTCTGATTAGCTTGTTGGCGGGGCAACGGCCCACCAAGGCGACGATCAGTAGGGGTTCTGAGAGGAAGGTCCCCCACATTGGAACTGAGACACGGTCCAAACTCCTACGGGAGGCAGCAGTGAGGAATATTGGTCAATGGACGCAAGTCTGAACCAGCCAAGTAGCGTGCAGGATGACGGCCCTATG…	Prevotella nigrescens	0 0	97 97		TGGGGGCATGCTTCAGTGCACGCTCCTCGCGGTCACGAACTTCAGGCACCCCCGGCTTTCATGGCTTGACGGGCGGTGTGTACAAGGCCCGGGAACGTATTCACCGCGCCATGGCTGATGCGCGATTACTAGCGAATCCAGCTTCGTGGGGTCGGGTTGCAGACCCCAGTCCGAACTGGGACCGGATTTCAAGATTGGATGCAACTTGCATTGCACCGTCCCTCTGTACCGGCCATTGTAACACGTGTGTAGCCCCGGACGTAAGGGCCGTGCTGATTTGACGTCATCCCCACCTTCCTCGCACCTTGCGGTGGCAGTGTCCCCAGAGTGCCCGGCATAACCCGATGGCAACTGGGAAAGGGGGTTGCGCTCGTTATGGCACTTAAGCCGACACCTCAC…	Prevotella nigrescens	0 0	97 97		0					0	0
5	1	7			TATTGTTCAGCTATAGCTTGCAAGTCGAGGGGAACGGCATTGAGTGCTTGCACTGAATGGACGTCGACCGGCGCACGGGTGAGTAACGCGTATCCAACCTTCCCGTTACTGCGGGATAACCTGCCGAAAGGCAGACTAATACCGCATGTTCTTCGATGACGGCATCAGATTCGAAGCAAAGATCCGTCGGTAACGGAGGGGGATGCGTCTGATTAGCTAGTTGGCGGGGCGACGGCCCACCAAGGCGACGATCAGTAGGGGTTCTGAGAGGAAGGTCCCCCACATTGGAACTGAGACACGGTCCAAACTCCTACGGGAGGCAGCAGTGAGGAATATTGGTCAATGGGCGGAAGCCTGAACCAGCCAAGTAGCGTGCAGGAGGACGGCCCTACGGGTTGT…	Prevotella denticola	0 0	97 97		TGGCAGTATGACTCTTCAGATCCTCGCGGTCACGGACTTCAGGCACCCCCGGCTTTCATGGCTTGACGGGCGGTGTGTACAAGGCCCGGGAACGTATTCACCGCGCCGTGGCTGATGCGCGATTACTAGCGAATCCAGCTTCGTGGGGTCGGGTTGCAGACCCCAGTCCGAACTGAGACCGGTTTTCAAGATTGGATGCGGCTCGCGCCGCACCGGCACTCTGTGCCGGCCATTGTAACACGTGTGTAGCCCCGGACGTAAGGGCCGTGCTGATTTGACGTCATCCCCGCCTTCCTCGCACCTTGCGGCGGCAGTGTCCCCGGAGTGCCCGGCATCACCCGATGGCAACTGGGGAGAGGGGTTGCGCTCGTTATGGCACTTAAGCCGACACCTCACGGC…	Prevotella denticola	0 0	97 97		1					1	0
	2	7			GGCTGTCACGTATCGATTGCAGTCGAGCGGTAACGGGATTGAGCTGCGTGTCTTGGCTGAACATCGACCGACGGATGAGTGATGTCTGGGAATCTGCCTGTCCCGTTACTGATAACTTAACCTGCCGAAAGGTAAACTAATACCGCATGTTCTTCCATGACAGGGGGACATTCGAAGCCTCTTGCCATCGGTGTGCCCAGATGATGTTACTGATTAGGTGGTTGGACGGGTCACCGCCCCCCCAATCCATAATTGGTCTGAGTTCTGAAACGAACGCCCTGCAATTGGAACTGATACACGACTCCTACTCCTAGGGGAGGGGGGAAGTTGAATATTGGTCAATGGCCTGATGCTGAATGCCCGTGTATGAGCAGGACTTGGCCCTGCGGGTTGTTTCTG…	Prevotella denticola	6E-67 3e-65	73		AGGGACAGCATCAGCTCTGCGCATCCTCGCGGTCGGGACTTACCGACTCCCCGTTGTTTCCCGGTCTGACGGCGGGAGGGGAGGTGTGTACGAGGCCCATTCAACGTATTCGCGGCGGAATTCTGATTAACAATTACTACAGCTTCCGACTTCCTGGATGCAAACCCCAGACTCAACTGAGACCGGCTTTCAAGATTGGAAGCGGCTCTTGCTCTCCGGGGTCTGTCTCTTTGTTGCAACATTGTAGTACGTGTGTACCCCTGGCCGTGCTGATTTGATGACTTGCCGCCTTCCCCACCTTCTGCCAGTTTATCGTGGCGGATCCTTTGAGTTCCCCGATGGACCGTGGGGAGAGGGGGAGCGCTCGTGATGTCGCTGAGGGACATACCCCACGGTTTC…	No significant similarity found				1					1	0
	3	7			AGGTGTAAAGGCTAACACTTGCAGTCGAGGGGAAACGGCATTAAGTGCTTGCACTTTTTGGACGTCGACCGGCGCACGGGTGAGTAACGCGTATCCAACCTTCCCATGACTAAGGGATAACCTGCCGAAAGGCAGACTAATACCTTATGGTCTTCACTGACGGCATCAGATGTGAAGTAAAGATTTATCGGTTATGGATGGGGATGCGTCTGATTAGCTTGTTGGCGGGGTAACGGCCCACCAAGGCAACGATCAGTAGGGGTTCTGAGAGGAAGGTCCCCCACATTGGAACTGAGACACGGTCCAAACTCCTACGGGAGGCAGCAGTGAGGAATATTGGTCAATGGGCGAGAGCCTGAACCAGCCAAGTAGCGTGCAGGATGACGGCCCTATGGGTTG…	Prevotella histicola	0 0	97 97		TGGCGGTTTGAACTCTGCCGATCCTTGCGGTCACGGACTTCAGGCACCCCCGGCTTTCATGGCTTGACGGGCGGTGTGTACAAGGCCCGGGAACGTATTCACCGCGCCATGGCTGATGCGCGATTACTAGCGAATCCAGCTTCGTGGGGTCGGGTTGCAGACCCCAGTCCGAACTGGGACCGGCTTTCAAGATTGGATGCAATTTACATTACACCGTCCCTCTGTACCGGCCATTGTAACACGTGTGTAGCCCCGGACGTAAGGGCCGTGCTGATTTGACGTCATCCCCACCTTCCTCACACCTTACGGTGGCAGTATCTCCAGAGTGCCCAGCTTAACCTGATGGCAACTAAAGACAGGGGTTGCGCTCGTTATGGCACTTAAGCCGACACCTCACGG…	Prevotella histicola	0	97		0					1	0
6	1	7			CTCCCGAAGGGGCTTACACATAGCAAGTCGAGGGGCAGCATGATCTTAGCTTGCTAAGGTCGATGGCGACCGGCGCACGGGTGCGTAACGCGTATGCAACTTGCCTTACAGAGGGGGATAACCCGTTGAAAGACGGACTAAAACCGCATACACTTGTATTATTGCATGATATTACAAGGAAATATTTATAGCTGTAAGATAGGCATGCGTCCCATTAGCTGGTTGGTGAGGTAACGGCTCACCAAGGCGACGATGGGTAGGGGAACTGAGAGGTTTATCCCCCACACTGGTACTGAGACACGGACCAGACTCCTACGGGAGGCAGCAGTGAGGAATATTGGTCAATGGGCGAGAGCCTGAACCAGCCAAGTCGCGTGAAGGAAGACTGTCCTAAGGATT…	Porphyromonas gingivalis	0	97		ACGGGAAATACCCTAGTGCGCCCCTTGCGGTTACGCCCTTCAGGTACCCCCGACTCCCATGGCTTGACGGGCGGTGTGTACAAGGCCCGGGAACGTATTCACCGCGCCATGGCTGATGCGCGATTACTAGCGAATCCAGCTTCACGGAGTCGAGTTGCAGACTCCGATCCGAACTGGGGAAGGGTTTAGAGATTCGCATCCGGTCGCCCGGTAGCTGCCCTTTGTCCCTCCCATTGTAACACGTGTGTCGCCCCGGATGTAAGGGCCGTGCTGATTTGACGTCATCCACACCTTCCTCGCGCCTTACGACGGCAGTCTCGGTAGAGTCCTCAGCGAAAACTGTTAGCAACTACCGATGTGGGTTGCGCTCGTTATGGCACTTAAGCCGACACCTCACGG…	Porphyromonas gingivalis	0	98		2	>6-1F NNNNNNNNNNNNNNGCCACCATCAGCGTGGTATTGAAGACCAGCAATCCGAATCGTGCTTTTGGAGTTGGCGATGACGAATCAAAGGTGGCTAAGTTGACCGTAATGGTTTATAATGGAGAACAGCAGGAAGCCATCAAATCAGCCGAAAATGCGACTAAGGTTGAAGACATCAAATGTAGTGCAGGCCAACGTACGCTGGTCGTAATGGCCAATACGGGTGCAATGGAACTGGTTGGCAAGACTCTTGCAGAGGTAAAAGCATTGACAACTGAACTGACTGCAGAAAATCAAGAGGCTGCAGGTTTGATCATGACAGCAGAGCCAAAAACAATCGTTTTGAAGGCAGGCAAGAACTACATTGGATACAGTGGAAACGGAGAGGGTAATCACA…	>6-1R, complement NNNNGNNNANNNCNNNANNNCTNNNNCNANTAGACAACTATGANGTTTTTTAGTCGTTTGACGGGTCGATTACCAAGTAGCATTCTGACCAACGAGAACCCACTCAGCTACAGTGCACTGTACATTCAAGTGAGCAGACTCTGTGATAGGATTCTCTGGGTTATTCGTTCCGGGGCCTGTGATTGTCAGCTTAATATCATACTTATGGTTACGCTCAATTTTATTCTTAGGCGTATAACCATTGTCATAAGTATAGTTGTTGCTGTTGAAGTTTACCAATACAGGGTAATAGGTCTTGCCTTCTGCATCCACCCAATTGGCGGCCTGAGCAGCTGCTAAATCGGCTCCCGCCAAGTCGGCTCCGTTTTTCTGAAGTTTGCC…	Ib		2	0
	2	7			ATCGGAAAAGGCCTTACACATAGCAAGTCGAGGGGCAGCATGATCTTAGCTTGCTAAGGTCGATGGCGACCGGCGCACGGGTGCGTAACGCGTATGCAACTTGCCTTACAGAGGGGGATAACCCGTTGAAAGACGGACTAAAACCGCATACACTTGTATTATTGCATGATATTACAAGGAAATATTTATAGCTGTAAGATAGGCATGCGTCCCATTAGCTGGTTGGTGAGGTAACGGCTCACCAAGGCGACGATGGGTAGGGGAACTGAGAGGTTTATCCCCCACACTGGTACTGAGACACGGACCAGACTCCTACGGGAGGCAGCAGTGAGGAATATTGGTCAATGGGCGAGAGCCTGAACCAGCCAAGTCGCGTGAAGGAAGACTGTCCTAAGGATT…	Porphyromonas gingivalis	0	97		CGGGGATTACCTAGTCACGCCCCTTGCGGTTACGCCCTTCAGGTACCCCCGACTCCCATGGCTTGACGGGCGGTGTGTACAAGGCCCGGGAACGTATTCACCGCGCCATGGCTGATGCGCGATTACTAGCGAATCCAGCTTCACGGAGTCGAGTTGCAGACTCCGATCCGAACTGGGGAAGGGTTTAGAGATTCGCATCCGGTCGCCCGGTAGCTGCCCTTTGTCCCTCCCATTGTAACACGTGTGTCGCCCCGGATGTAAGGGCCGTGCTGATTTGACGTCATCCACACCTTCCTCGCGCCTTACGACGGCAGTCTCGGTAGAGTCCTCAGCGAAAACTGTTAGCAACTACCGATGTGGGTTGCGCTCGTTATGGCACTTAAGCCGACACCTCACGGC…	Porphyromonas gingivalis	0	97		2	>6-2F NNTNANNNNGTATGCCACCATCAGCGTGGTATTGAAGACCAGCAATCCGAATCGTGCTTTTGGAGTTGGCGATGACGAATCAAAGGTGGCTAAGTTGACCGTAATGGTTTATAATGGAGAACAGCAGGAAGCCATCAAATCAGCCGAAAATGCGACTAAGGTTGAAGACATCAAATGTAGTGCAGGCCAACGTACGCTGGTCGTAATGGCCAATACGGGTGCAATGGAACTGGTTGGCAAGACTCTTGCAGAGGTAAAAGCATTGACAACTGAACTGACTGCAGAAAATCAAGAGGCTGCAGGTTTGATCATGACAGCAGAGCCAAAAACAATCGTTTTGAAGGCAGGCAAGAACTACATTGGATACAGTGGAAACGGAGAGGGTAATCACAT…		Ib		2	0
	3	7			AACCGATAGGCCTTAAAACATGCAAGTCGAGGGGCAGCATGATCTTAGCTTGCTAAGGTCGATGGCGACCGGCGCACGGGTGCGTAACGCGTATGCAACTTGCCTTACAGAGGGGGATAACCCGTTGAAAGACGGACTAAAACCGCATACACTTGTATTATTGCATGATATTACAAGGAAATATTTATAGCTGTAAGATAGGCATGCGTCCCATTAGCTGGTTGGTGAGGTAACGGCTCACCAAGGCGACGATGGGTAGGGGAACTGAGAGGTTTATCCCCCACACTGGTACTGAGACACGGACCAGACTCCTACGGGAGGCAGCAGTGAGGAATATTGGTCAATGGGCGAGAGCCTGAACCAGCCAAGTCGCGTGAAGGAAGACTGTCCTAAGGATTG…	Porphyromonas gingivalis	0	97		CCGGGGACATACCTAGTCACGCCCCTTGCGGTTACGCCCTTCAGGTACCCCCGACTCCCATGGCTTGACGGGCGGTGTGTACAAGGCCCGGGAACGTATTCACCGCGCCATGGCTGATGCGCGATTACTAGCGAATCCAGCTTCACGGAGTCGAGTTGCAGACTCCGATCCGAACTGGGGAAGGGTTTAGAGATTCGCATCCGGTCGCCCGGTAGCTGCCCTTTGTCCCTCCCATTGTAACACGTGTGTCGCCCCGGATGTAAGGGCCGTGCTGATTTGACGTCATCCACACCTTCCTCGCGCCTTACGACGGCAGTCTCGGTAGAGTCCTCAGCGAAAACTGTTAGCAACTACCGATGTGGGTTGCGCTCGTTATGGCACTTAAGCCGACACCTCACG…	Porphyromonas gingivalis	0	97		2	>6-3F NNNANNNNNNATGCCACCATCAGCGTGGTATTGAAGACCAGCAATCCGAATCGTGCTTTTGGAGTTGGCGATGACGAATCAAAGGTGGCTAAGTTGACCGTAATGGTTTATAATGGAGAACAGCAGGAAGCCATCAAATCAGCCGAAAATGCGACTAAGGTTGAAGACATCAAATGTAGTGCAGGCCAACGTACGCTGGTCGTAATGGCCAATACGGGTGCAATGGAACTGGTTGGCAAGACTCTTGCAGAGGTAAAAGCATTGACAACTGAACTGACTGCAGAAAATCAAGAGGCTGCAGGTTTGATCATGACAGCAGAGCCAAAAACAATCGTTTTGAAGGCAGGCAAGAACTACATTGGATACAGTGGAAACGGAGAGGGTAATCACATT…	>6-3R, complement NNNNNNNNNNTNGANANAGACAACTATGAAAGTTTTTTAGTCGTTTGACGGGTCGATTACCAAGTAGCATTCTGACCAACGAGAACCCACTCAGCTACAGTGCACTGTACATTCAAGTGAGCAGACTCTGTGATAGGATTCTCTGGGTTATTCGTTCCGGGGCCTGTGATTGTCAGCTTAATATCATACTTATGGTTACGCTCAATTTTATTCTTAGGCGTATAACCATTGTCATAAGTATAGTTGTTGCTGTTGAAGTTTACCAATACAGGGTAATAGGTCTTGCCTTCTGCATCCACCCAATTGGCGGCCTGAGCAGCTGCTAAATCGGCTCCCGCCAAGTCGGCTCCGTTTTTCTGAAGTTTGCCATAAACACACAGG…	Ib		2	0
7	3				CGTGCCAGGCTTACACATGCAGTCGAGGGGAACGGCATTGAGTGCTTGCACTGAATGGACGTCGACCGGCGCACGGGTGAGTAACGCGTATCCAACCTTCCCGTTACTGCGGGATAACCTGCCGAAAGGCAGACTAATACCGCATGTTCTTCGATGACGGCATCAGATTCGAAGCAAAGATTCGTCGGTAACGGAGGGGGATGCGTCTGATTAGCTGGTTGGCGGGGCGACGGCCCACCAAGGCGACGATCAGTAGGGGTTCTGAGAGGAAGGTCCCCCACATTGGAACTGAGACACGGTCCAAACTCCTACGGGAGGCAGCAGTGAGGAATATTGGTCAATGGGCGGAAGCCTGAACCAGCCAAGTAGCGTGCAGGATGACGGCCCTACGGGTTGTAA…	Prevotella denticola	0	95
8	1				CATGCCAGGGCTTACACATGCAGTCGTGGGGAACGGCATTATGTGCTTGCACATTCTGGACGTCGACCGGCGCACGGGTGAGTATCGCGTATCCAACCTGCCCCTTACTTGGGGATACCCCGTTGAAAGACGGCCTAATACCCGATGTGTTTCATTGACGGCATCCGATATGAAACAAAGGTTTTTCCGGTAAGGGAGGGGGATGCGTCTGATTAGCTGGTTGGCGGGGCAACGGCCCACCAAGGCGACAATCAGTAGGGGTTCTGAAAGGAAGGTCCCCCACATTGGAACTGAAACACGGTCCAAACTCCTACGGGAGGCAGCAGTGAGGAATATTGGTCAATGGACGCAAGTCTGAACCAGCCAAGTAGCGGGCAGGATGACGGCCCTATGGGTTGT…	Prevotella nigrescens	0	95							*Faint positive bands (score 0) were further analyzed by DNA sequencing
	2				AATTGCCCTAGGCTTACACATGCAGTCGTGGGGAACGGCATTATGTGCTTGCACATTCTGGACGTCGACCGGCGCACGGGTGAGTATCGCGTATCCAACCTGCCCCTTACTTGGGGATACCCCGTTGAAAGACGGCCTAATACCCGATGTGTTTCATTGACGGCATCCGATATGAAACAAAGGTTTTTCCGGTAAGGGAGGGGGATGCGTCTGATTAGTTTGTTGGGGGGGCAACGGCCCACCAAGGCAACAATCAGTAGGGGTTCTGAAAGGAAGGTCCCCCACTTTGAAACTGAAACACGGCCCAAACTCCTACGGGAGGCAGCAGGGAGGAATATTGGTCAAGGGACGCAAGTCTGAACCACCCAAGTAGCGGGCAGGATGACGGCCCTATGGGTT…	Prevotella nigrescens	0	93
	3				CCGCGGTCCAGGCTATACGCTTGCAGTCGTGGGGAAACGGCATTATGTGCTTGCACATTCTGGACGTCGACCGGCGCACGGGTGAGTATCGCGTATCCAACCTGCCCCTTACTTGGGGATACCCCGTTGAAAGACGGCCTAATACCCGATGTGTTTCATTGACGGCATCCGATATGAAACAAAGGTTTTTCCGGTAAGGGATGGGGATGCGTCTGATTAGCTTGTTGGCGGGGCAACGGCCCACCAAGGCGACAATCAGTAGGGGTTCTGAAAGGAAGGTCCCCCACTTTGGAACTGAAACACGGTCCAAACTCCTACGGGAGGCAGCAGTGAGGAATATTGGTCAATGGACGCAAGTCTGAACCACCCAAGTAGCGGGCAGGATGACGGCCCTATGGG…	Prevotella nigrescens	0	94
9	2				CGTGCCCAGGGCTTACACATGCAGTCGAGGGGAACGGCATTTGGTGCTTGCACCGAATGGACGTCGACCGGCGCACGGGTGAGTAACGCGTATCCAACCTTCCCGTTACTGCGGGATAACCTGCCGAAAGGCAGACTAATACCGCATGTTCTTCGATGACGGCATCAGATTCGAAGCAAAGATCCGTCGGTAACGGAGGGGGATGCGTCTGATTAGCTGGTTGGCGGGGCGACGGCCCACCAAGGCGACGATCAGTAGGGGTTCTGAGAGGAAGGTCCCCCACATTGGAACTGAGACACGGTCCAAACTCCTACGGGAGGCAGCAGTGAGGAATATTGGTCAATGGGCGGAAGCCTGAACCAGCCAAGTAGCGTGCAGGATGACGGCCCTACGGGTTGT…	Prevotella denticola	0	98
	4				AATGATCAGGCATACACTTGCAAGTCGAGGGGAACGGCATTTGGTGCTTGCACCGAATGGACGTCGACCGGCGCACGGGTGAGTAACGCGTATCCAACCTTCCCGTTACTGCGGGATAACCTGCCGAAAGGCAGACTAATACCGCATGTTCTTCGATGACGGCATCAGATTCGAAGCAAAGATCCGTCGGTAACGGAGGGGGATGCGTCTGATTAGCTGGTTGGCGGGGCGACGGCCCACCAAGGCGACGATCAGTAGGGGTTCTGAGAGGAAGGTCCCCCACATTGGAACTGAGACACGGTCCAAACTCCTACGGGAGGCAGCAGTGAGGAATATTGGTCAATGGGCGGAAGCCTGAACCAGCCAAGTAGCGTGCAGGATGACGGCCCTACGGGTTGT…	Prevotella denticola	0	97
	5				AATGCCAGCTACACATGCAAGTCGAGGGGAACGGCATTTGGTGCTTGCACCGAATGGACGTCGACCGGCGCACGGGTGAGTAACGCGTATCCAACCTTCCCGTTACTGCGGGATAACCTGCCGAAAGGCAGACTAATACCGCATGTTCTTCGATGACGGCATCAGATTCGAAGCAAAGATCCGTCGGTAACGGAGGGGGATGCGTCTGATTAGCTGGTTGGCGGGGCGACGGCCCACCAAGGCGACGATCAGTAGGGGTTCTGAGAGGAAGGTCCCCCACATTGGAACTGAGACACGGTCCAAACTCCTACGGGAGGCAGCAGTGAGGAATATTGGTCAATGGGCGGAAGCCTGAACCAGCCAAGTAGCGTGCAGGATGACGGCCCTACGGGTTGTAAA…	Prevotella denticola	0	98
	6				AATGCCCAGGCTAACACTTGCAGTCGAGGGGAACGGCATTTGGTGCTTGCACCGAATGGACGTCGACCGGCGCACGGGTGAGTAACGCGTATCCAACCTTCCCGTTACTGCGGGATAACCTGCCGAAAGGCAGACTAATACCGCATGTTCTTCGATGACGGCATCAGATTCGAAGCAAAGATCCGTCGGTAACGGAGGGGGATGCGTCTGATTAGCTGGTTGGCGGGGCGACGGCCCACCAAGGCGACGATCAGTAGGGGTTCTGAGAGGAAGGTCCCCCACATTGGAACTGAGACACGGTCCAAACTCCTACGGGAGGCAGCAGTGAGGAATATTGGTCAATGGGCGGAAGCCTGAACCAGCCAAGTAGCGTGCAGGATGACGGCCCTACGGGTTGTA…	Prevotella denticola	0	98
10	1				AATTGCAAGGCTTACACAAAGCAGTCGTGGGGAACGGCATTATGTGCTTGCACATTCTGGACGTCGACCGGCGCACGGGTGAGTATCGCGTATCCAACCTGCCCCTTACTTGGGGATACCCCGTCGAAAGACGGCCTAATACCCGATGTGTTTCATTGACGGCATCCGATATGAAACAAAGGTTTTCCGGTAAGGGATGGGGATGCGTCTGATTAGCTTGTTGGCGGGGCAACGGCCCACCAAGGCGACGATCAGTAGGGGTTCTGAGAGGAAGGTCCCCCACATTGGAACTGAGACACGGTCCAAACTCCTACGGGAGGCAGCAGTGAGGAATATTGGTCAATGGACGCAAGTCTGAACCAGCCAAGTAGCGTGCAGGATGACGGCCCTATGGGTTGT…	Prevotella nigrescens	0	97
	2				AATGCCAGGCTTACACATGCAAGTCGTGGGGAACGGCATTATGTGCTTGCACATTCTGGACGTCGACCGGCGCACGGGTGAGTATCGCGTATCCAACCTGCCCCTTACTTGGGGATACCCCGTCGAAAGACGGCCTAATACCCGATGTGTTTCATTGACGGCATCCGATATGAAACAAAGGTTTTCCGGTAAGGGATGGGGATGCGTCTGATTAGCTTGTTGGCGGGGCAACGGCCCACCAAGGCGACGATCAGTAGGGGTTCTGAGAGGAAGGTCCCCCACATTGGAACTGAGACACGGTCCAAACTCCTACGGGAGGCAGCAGTGAGGAATATTGGTCAATGGACGCAAGTCTGAACCAGCCAAGTAGCGTGCAGGATGACGGCCCTATGGGTTGTA…	Prevotella nigrescens	0	97
	3				CGTCTATGCTTACACATGCAGTCGAGGGGAACGGCATTGAGTGCTTGCACTCTTTGGACGTCGACCGGCGCACGGGTGAGTAACGCGTATCCAACCTTCCCATTACTGTGGGATAACCTGCCGAAAGGCAGACTAATACCGCATAGTCTTCGATGACGGCATCAGATTTGAAGTAAAGATTTATCGGTAATGGATGGGGATGCGTCTGATTAGCTTGTTGGCGGGGTAACGGCCCACCAAGGCGACGATCAGTAGGGGTTCTGAGAGGAAGGTCCCCCACATTGGAACTGAGACACGGTCCAAACTCCTACGGGAGGCAGCAGTGAGGAATATTGGTCAATGGACGTAAGTCTGAACCAGCCAAGTAGCGTGCAGGATGACGGCCCTATGGGTTGTAAA…	Prevotella melaninogenica	0	97
11	1				AGTCGTGGGGAACGGCATTATGTGCTTGCACATTCTGGACGTCGACCGGCGCACGGGTGAGTATCGCGTATCCAACCTGCCCCTTACTTGGGGATACCCCGTTGAAAGACGGCCTAATACCCGATGTGTTTCATTGACGGCATCCGATATGAAACAAAGGTTTTCCGGGAAGGGATGGGGATGCGTCTGATTAGCTTGTTGGGGGGGCAACGGCCCACCAAGGGGACGATCAGTAGGGGTTCTGAAAGGAAGGTCCCCCACATTGGAACTGAAACACGGTCCAAACTCCTACGGGAGGCAGCAGTGAGGAATATTGGTCAATGGACGCAAGTCTGAACCAGCCAAGTAGCGTGGAGGATGACGGCCCTATGGGTTGTAAACTGCTTTTATGTGGGAATA…	Prevotella nigrescens	0	100
	2				AGTCGTGGGGAACGGCATTATGTGCTTGCACATTCTGGACGTCGACCGGCGCACGGGTGAGTATCGCGTATCCAACCTGCCCCTTACTTGGGGATACCCCGTTGAAAGACGGCCTAATACCCGATGTGTTTCATTGACGGCATCCGATATGAAACAAAGGTTTTTCGGGAAGGGAAGGG	Prevotella nigrescens	4e-81	98
	3				AGTCGAGGGGAACGGCATTGAGTGCTTGCACTGAATGGACGTCGACCGGCGCACGGGTGAGTAACGCGTATCCAACCTTCCCGTTACTGCGGGATAACCTGCCGAAAGGCAGACTAATACCGCATGTTCTTCGATGACGGCATCAGATTCGAAGCAAAGACCCGTCGGTAACGGAGGGGGATGCGTCTGATTAGCTAGTTGGCGGGGCGACGGCCCACCAAGGCGACGATCAGTAGGGGTTCTGAGAGGAAGGTCCCCCACATTGGAACTGAGACACGGTCCAAACTCCTACGGGAGGCAGCAGTGAGGAATATTGGTCAATGGGCGGAAGCCTGAACCAGCCAAGTAGCGTGCAGGACGACGGCCCTACGGGTTGTAAACTGCTTTTATGCGGGGATA…	Prevotella denticola	0	99
12	1				CGTGCCAGCTTACACATGCAGTCGTGGGGAACGGCATTATGTGCTTGCACATTCTGGACGTCGACCGGCGCACGGGTGAGTATCGCGTATCCAACCTGCCCCTTACTTGGGGATACCCCGTTGAAAGACGGCCTAATACCCGATGTGTTTCATTGACGGCATCCGATATGAAACAAAGGTTTTTTCCGGTAAGGGATGGGGATGCGTCTGATTAGCTTGTTGGCGGGGCAACGGCCCACCAAGGCGACAATCAGTAGGGGTTCTGAGAGGAAGGTCCCCCACATTGGAACTGAAACACGGTCCAAACTCCTACGGGAGGCAGCAGTGAGGAATATTGGTCAATGGACGCAAGTCTGAACCAGCCAAGTAGCGTGCAGGATGACGGCCCTATGGGTTGTA…	Prevotella nigrescens	0	97
	2				AATGCCCGGCTTACACATGCAAGTCGTGGGGAACGGCATTATGTGCTTGCACATTCTGGACGTCGACCGGCGCACGGGTGAGTATCGCGTATCCAACCTGCCCCTTACTTGGGGATACCCCGTTGAAAGACGGCCTAATACCCGATGTGTTTCATTGACGGCATCCGATATGAAACAAAGGTTTTTTCCGGTAAGGGATGGGGATGCGTCTGATTAGCTTGTTGGCGGGGCAACGGCCCACCAAGGCGACAATCAGTAGGGGTTCTGAGAGGAAGGTCCCCCACATTGGAACTGAAACACGGTCCAAACTCCTACGGGAGGCAGCAGTGAGGAATATTGGTCAATGGACGCAAGTCTGAACCAGCCAAGTAGCGTGCAGGATGACGGCCCTATGGGTTG…	Prevotella nigrescens	0	97
	3				CGTCTATGCTTACACATGCAGTCGAGGGGAACGGCATTGAGTGCTTGCACTCTTTGGACGTCGACCGGCGCACGGGTGAGTAACGCGTATCCAACCTTCCCATTACTGTGGGATAACCTGCCGAAAGGCAGACTAATACCGCATAGTCTTCGATGACGGCATCAGATTTGAAGTAAAGATTTATCGGTAATGGATGGGGATGCGTCTGATTAGCTTGTTGGCGGGGTAACGGCCCACCAAGGCGACGATCAGTAGGGGTTCTGAGAGGAAGGTCCCCCACATTGGAACTGAGACACGGTCCAAACTCCTACGGGAGGCAGCAGTGAGGAATATTGGTCAATGGACGTAAGTCTGAACCAGCCAAGTAGCGTGCAGGATGACGGCCCTATGGGTTGTAAA…	Prevotella melaninogenica	0	97
13	1				AGTCGTGGGGAACGGCATTATGTGCTTGCACATTCTGGACGTCGACCGGCGCACGGGTGAGTATCGCGTATCCAACCTGCCCCTTACTTGGGGATACCCCGTTGAAAGACGGCCTAATACCCGATGTGTTTCATTGACGGCATCCGATATGAAACAAAGGTTTTCCGGTAAGGGATGGGGATGCGTCTGATTAGCTTGTTGGCGGGGCAACGGCCCACCAAGGCGACGATCAGTAGGGGTTCTGAGAGGAAGGTCCCCCACATTGGAACTGAGACACGGTCCAAACTCCTACGGGAGGCAGCAGTGAGGAATATTGGTCAATGGACGCAAGTCTGAACCAGCCAAGTAGCGTGCAGGATGACGGCCCTATGGGTTGTAAACTGCTTTTATGTGGGAATA…	Prevotella nigrescens	0	99
	3				AGTCGTGGGGAACGGCATTATGTGCTTGCACATTCTGGACGTCGACCGGCGCACGGGTGAGTATCGCGTATCCAACCTGCCCCTTACTTGGGGATACCCCGTTGAAAGACGGCCTAATACCCGATGTGTTTCATTGACGGCATCCGATATGAAACAAAGGTTTTCCGGTAAGGGATGGGGATGCGTCTGATTAGCTTGTTGGCGGGGCAACGGCCCACCAAGGCGACGATCAGTAGGGGTTCTGAGAGGAAGGTCCCCCACATTGGAACTGAGACACGGTCCAAACTCCTACGGGAGGCAGCAGTGAGGAATATTGGTCAATGGACGCAAGTCTGAACCAGCCAAGTAGCGTGCAGGATGACGGCCCTATGGGTTGTAAACTGCTTTTATGTGGGAATA…	Prevotella nigrescens	0	99
14	1				AATCCAAAGGCCTTACACATGCAAGTCGAGGGGAACGGCATTATGTGCTTGCACATTCTGGACGTCGACCGGCGCACGGGTGAGTATCGCGTATCCAACCTTCCCTCCACTCGGGGATACCCCGTTGAAAGACGGCCTAATACCCGATGTTGTCCACATATGGCATCTGACGTGGACCAAAGATTCATCGGTGGAGGATGGGGATGCGTCTGATTAGCTTGTTGGTGCGGGTAACGGCCCACCAAGGCAACGATCAGTAGGGGTTCTGAGAGGAAGGTCCCCCACATTGGAACTGAGACACGGTCCAAACTCCTACGGGAGGCAGCAGTGAGGAATATTGGTCAATGGACGGAAGTCTGAACCAGCCAAGTAGCGTGCAGGATTGACGGCCCTATGGGT…	Prevotella intermedia	0	96
	2				CGGCGTCGCTTACACATGCAGTCGAGGGGAACGGCATTATGTGCTTGCACATTCTGGACGTCGACCGGCGCACGGGTGAGTATCGCGTATCCAACCTTCCCTCCACTCGGGGATACCCCGTTGAAAGACGGCCTAATACCCGATGTTGTCCACATATGGCATCTGACGTGGACCAAAGATTCATCGGTGGAGGATGGGGATGCGTCTGATTAGCTTGTTGGTGCGGGTAACGGCCCACCAAGGCAACGATCAGTAGGGGTTCTGAGAGGAAGGTCCCCCACATTGGAACTGAGACACGGTCCAAACTCCTACGGGAGGCAGCAGTGAGGAATATTGGTCAATGGACGGAAGTCTGAACCAGCCAAGTAGCGTGCAGGATTGACGGCCCTATGGGTTGTA…	Prevotella intermedia	0	98
	3				CATCCCACGCTTACACATGCAGTCGAGGGGAACGGCATTATGTGCTTGCACATTCTGGACGTCGACCGGCGCACGGGTGAGTATCGCGTATCCAACCTTCCCTCCACTCGGGGATACCCCGTTGAAAGACGGCCTAATACCCGATGTTGTCCACATATGGCATCTGACGTGGACCAAAGATTCATCGGTGGAGGATGGGGATGCGTCTGATTAGCTTGTTGGTGCGGGTAACGGCCCACCAAGGCAACGATCAGTAGGGGTTCTGAGAGGAAGGTCCCCCACATTGGAACTGAGACACGGTCCAAACTCCTACGGGAGGCAGCAGTGAGGAATATTGGTCAATGGACGGAAGTCTGAACCAGCCAAGTAGCGTGCAGGATTGACGGCCCTATGGGTTGT…	Prevotella intermedia	0	97
15	1				CGTGCGATGGCTACACATGCAGTCGAGGGGCAGCATGATCTTAGCTTGCTAAGGTCGATGGCGACCGGCGCACGGGTGCGTAACGCGTATGCAACTTGCCTTACAGAGGGGGATAACCCGTTGAAAGACGGACTAAAACCGCATACACTTGTATTATTGCATGATATTACAAGGAAATATTTATAGCTGTAAGATAGGCATGCGTCCCATTAGCTTGTTGGTGAGGTAACGGCTCACCAAGGCGACGATGGGTAGGGGAACTGAGAGGTTTATCCCCCACACTGGTACTGAGACACGGACCAGACTCCTACGGGAGGCAGCAGTGAGGAATATTGGTCAATGGGCGAGAGCCTGAACCAGCCAAGTCGCGTGAAGGAAGACAGTCCTAAGGATTGTAAA…	Porphyromonas gingivalis	0	97
	2				CATCCGATGCTTCCACATGCAGTCGAGGGGCAGCATGATCTTAGCTTGCTAAGGTCGATGGCGACCGGCGCACGGGTGCGTAACGCGTATGCAACTTGCCTTACAGAGGGGGATAACCCGTTGAAAGACGGACTAAAACCGCATACACTTGTATTATTGCATGATATTACAAGGAAATATTTATAGCTGTAAGATAGGCATGCGTCCCATTAGCTTGTTGGTGAGGTAACGGCTCACCAAGGCGACGATGGGTAGGGGAACTGAGAGGTTTATCCCCCACACTGGTACTGAGACACGGACCAGACTCCTACGGGAGGCAGCAGTGAGGAATATTGGTCAATGGGCGAGAGCCTGAACCAGCCAAGTCGCGTGAAGGAAGACAGTCCTAAGGATTGTAAA…	Porphyromonas gingivalis	0	98
	3				GTCGAGGGGCAGCATGATCTTAGCTTGCTAAGGTCGATGGCGACCGGCGCACGGGTGCGTAACGCGTATGCAACTTGCCTTACAGAGGGGGATAACCCGTTGAAAGACGGACTAAAACCGCATACACTTGTATTATTGCATGATATTACAAGGAAATATTTATAGCTGTAAGATAGGCATGCGTCCCATTAGCTTGTTGGTGAGGTAACGGCTCACCAAGGCGACGATGGGTAGGGGAACTGAGAGGTTTATCCCCCACACTGGTACTGAGACACGGACCAGACTCCTACGGGAGGCAGCAGTGAGGAATATTGGTCAATGGGCGAGAGCCTGAACCAGCCAAGTCGCGTGAAGGAAGACAGTCCTAAGGATTGTAAACTTCTTTTATACGGGAATAAC…	Porphyromonas gingivalis	0	99
16	1				GTCGAGGGGAACGGCATTATGTGCTTGCACATTCTGGACGTCGACCGGCGCACGGGTGAGTATCGCGTATCCAACCTTCCCTCCACTCGGGGATACCCCGTTGAAAGACGGCCTAATACCCGATGTTGTCCACATATGGCATCTGACGTGGACCAAAGATTCATCGGTGGAGGATGGGGATGCGTCTGATTAGCTTGTTGGTGCGGGTAACGGCCCACCAAGGCGACGATCAGTAGGGGTTCTGAGAGGAAGGTCCCCCACATTGGAACTGAGACACGGTCCAAACTCCTACGGGAGGCAGCAGTGAGGAATATTGGTCAATGGACGTAAGTCTGAACCAGCCAAGTAGCGTGCAGGATTGACGGCCCTATGGGTTGTAAACTGCTTTTGTTGGGGAGT…	Prevotella intermedia	0	99
17	1				AGTCGTGGGGAACGGCATTATGTGCTTGCACATTCTGGACGTCGACCGGCGCACGGGTGAGTATCGCGTATCCAACCTGCCCCTTACTTGGGGATACCCCGTTGAAAGACGGCCTAATACCCGATGTGTTTCATTGACGGCATCCGATATGAAACAAAGGTTTTTCCGGTAAGGGATGGGGATGCGTCTGATTAGCTTGTTGGCGGGGCAACGGCCCACCAAGGCAACGATCAGTAGGGGTTCTGAAAGGAAGGTCCCCCACATTGGAACTGAAACACGGTCCAAACTCCTACGGGAGGCAGCAGTGAGGAATATTGGTCAATGGACGCAAGTCTGAACCAGCCAAGTAGCGTGCAGGATGACGGCCCTATGGGTTGTAAACTGCTTTTATGTGGGAAT…	Prevotella nigrescens	0	99
	2				CGTCCAGGCTTACACATGCAGTCGTGGGGAACGGCATTATGTGCTTGCACATTCTGGACGTCGACCGGCGCACGGGTGAGTATCGCGTATCCAACCTGCCCCTTACTTGGGGATACCCCGTTGAAAGACGGCCTAATACCCGATGTGTTTCATTGACGGCATCCGATATGAAACAAAGGTTTTTCCGGTAAGGGATGGGGATGCGTCTGATTAGCTTGTTGGCGGGGCAACGGCCCACCAAGGCAACGATCAGTAGGGGTTCTGAGAGGAAGGTCCCCCACATTGGAACTGAAACACGGTCCAAACTCCTACGGGAGGCAGCAGTGAGGAATATTGGTCAATGGACGCAAGTCTGAACCAGCCAAGTAGCGTGCAGGATGACGGCCCTATGGGTTGTAA…	Prevotella nigrescens	0	96
	3				CGTCCAGGCTTACACATGCAGTCGTGGGGAACGGCATTATGTGCTTGCACATTCTGGACGTCGACCGGCGCACGGGTGAGTATCGCGTATCCAACCTGCCCCTTACTTGGGGATACCCCGTTGAAAGACGGCCTAATACCCGATGTGTTTCATTGACGGCATCCGATATGAAACAAAGGTTTTTCCGGTAAGGGATGGGGATGCGTCTGATTAGCTTGTTGGCGGGGCAACGGCCCACCAAGGCAACGATCAGTAGGGGTTCTGAAAGGAAGGTCCCCCACATTGGAACTGAAACACGGTCCAAACTCCTACGGGAGGCAGCAGTGAGGAATATTGGTCAATGGACGCAAGTCTGAACCAGCCAAGTAGCGTGCAGGATGACGGCCCTATGGGTTGTAA…	Prevotella nigrescens	0	97
18	2				AAGTCGTGGGGAACGGCATTATGTGCTTGCACATTCTGGACGTCGACCGGCGCACGGGTGAGTATCGCGTATCCAACCTGCCCCTTACTTGGGGATACCCCGTTGAAAGACGGCCTAATACCCGATGTGTTTCATTGACGGCATCCGATATGAAACAAAGGTTTTCCGGGAAGGGGAGGG	Prevotella nigrescens	8e-83	98
	3				CGTGGGGAACGGCATTATGTGCTTGCACATTCTGGACGTCGACCGGCGCACGGGTGAGTATCGCGTATCCAACCTGCCCCTTACTTGGGGATACCCCGTTGAAAGACGGCCTAATACCCGATGTGTTTCATTGACGGCATCCGATATGAAACAAAGGTTTTTCGGGAAGGGGAGGGGAAGGCTCCGAATTACTTGGTGGGGGGGCCACCGCCCCCCCAGGGCAACAATCATAAGGGTTCCGAAAAGAAAGGCCCCC	Prevotella nigrescens	3e-88	90
19	1				TCGTGGGGAACGGCATTATGTGCTTGCACATTCTGGACGTCGACCGGGAGGGGGGGTATCGCGTATCCAACCTGCCCCTTACTTGGGGATACCCGTTGAAAGACGGCCTAATACCCGATGTGTTTCATTGACGGCATCCGATATGAAACAAAGGTTTTTCGG	Prevotella nigrescens	3e-66	96
	2				CGTGGGGAACGGCATTATGTGCTTGCACATTCTGGACGTCGACCGGCGCACGGGTGAGTATCGCGTATCCAACCTGCCCCTTACTTGGGGATACCCCGTTGAAAGACGGCCTAATACCCGATGTGTTTCATTGACGGCATCCGATATGAAACAAAGGTTTTTCGGGAAGGGAAGGGGAAGGCTTTGAATTACTTGGTGGGGGGGCCACCGCCCCCCCAGGGCGACAACCATAGGGGGTCCGAAAAGAAGGGCCCCCCC	Prevotella nigrescens	9e-89	90
	3				GTCGTGGGGAACGGCAATTATGTGCTTGCACATTCTGGACGTCGACCGGCGTAGGGAGAGTATCGCGTATCCAACCTGCCCCTTACTTGGGGATACCCCGTTGAAAGACGGCCTAATACCCGATGTGTTTCATTGACGGCATCCGATATGAAACAAAGGTTTTTCGGGAAGGGGTGGGGAAGGCTCTGAATTACTTGGTGGGGGGGGCACCGGCCCCCCAGGGCAACAATCATAAGGGTTCCGAAAAGAAAGGCCCCCCCCTTGGAACTGAAAACCCGGCCCAACTCCTACCGGAAGGAACAATGGAGAATATTGGTCCATGGAACCCAGGCTTAACCCACCCAATAACGGGGC	Prevotella nigrescens	1e-99	88
20	1				AATGCCAGGCTTACACATGCAGTCGTGGGGAACGGCATTATGTGCTTGCACATTCTGGACGTCGACCGGCGCACGGGTGAGTATCGCGTATCCAACCTGCCCCTTACTTGGGGATACCCCGTTGAAAGACGGCCTAATACCCGATGTGTTTCATTGACGGCATCCGATATGAAACAAAGGTTTTTCCGGTAAGGGATGGGGATGCGTCTGATTAGCTTGTTGGCGGGGCAACGGCCCACCAAGGCGACGATCAGTAGGGGTTCTGAGAGGAAGGTCCCCCACATTGGAACTGAGACACGGTCCAAACTCCTACGGGAGGCAGCAGTGAGGAATATTGGTCAATGGACGCAAGTCTGAACCAGCCAAGTAGCGTGCAGGATGACGGCCCTATGGGTTGTA…	Prevotella nigrescens	0	97
	2				AGTCGTGGGGAACGGCATTATGTGCTTGCACATTCTGGACGTCGACCGGCGCACGGGTGAGTATCGCGTATCCAACCTGCCCCTTACTTGGGGATACCCCGTTGAAAGACGGCCTAATACCCGATGTGTTTCATTGACGGCATCCGATATGAAACAAAGGTTTTTCCGGTAAGGGATGGGGATGCGTCTGATTAGCTTGTTGGCGGGGCAACGGCCCACCAAGGCGACGATCAGTAGGGGTTCTGAGAGGAAGGTCCCCCACATTGGAACTGAGACACGGTCCAAACTCCTACGGGAGGCAGCAGTGAGGAATATTGGTCAATGGACGCAAGTCTGAACCAGCCAAGTAGCGTGCAGGATGACGGCCCTATGGGTTGTAAACTGCTTTTATGTGGGAAT…	Prevotella nigrescens	0	99
	3				CAGTCGTGGGGAACGGCATTATGTGCTTGCACATTCTGGACGTCGACCGGCGCACGGGTGAGTATCGCGTATCCAACCTGCCCCTTACTTGGGGATACCCCGTTGAAAGACGGCCTAATACCCGATGTGTTTCATTGACGGCATCCGATATGAAACAAAGGTTTTTCCGGTAAGGGATGGGGATGCGTCTGATTAGCTTGTTGGCGGGGCAACGGCCCACCAAGGCGACGATCAGTAGGGGTTCTGAGAGGAAGGTCCCCCACATTGGAACTGAGACACGGTCCAAACTCCTACGGGAGGCAGCAGTGAGGAATATTGGTCAATGGACGCAAGTCTGAACCAGCCAAGTAGCGTGCAGGATGACGGCCCTATGGGTTGTAAACTGCTTTTATGTGGGAA…	Prevotella nigrescens	0	99
21	No black-pigmented colony
22	2				CGGCCAGGCTTACACATGCAGTCGTGGGGAACGGCATTATGTGCTTGCACATTCTGGACGTCGACCGGCGCACGGGTGAGTATCGCGTATCCAACCTGCCCCTTACTTGGGGATACCCCGTCGAAAGACGGCCTAATACCCGATGTGTTTCATTGACGGCATCCGATATGAAACAAAGGTTTTCCGGTAAGGGATGGGGATGCGTCTGATTAGCTTGTTGGCGGGGCAACGGCCCACCAAGGCGACGATCAGTAGGGGTTCTGAGAGGAAGGTCCCCCACATTGGAACTGAGACACGGTCCAAACTCCTACGGGAGGCAGCAGTGAGGAATATTGGTCAATGGACGCAAGTCTGAACCAGCCAAGTAGCGTGCAGGATGACGGCCCTATGGGTTGTAAA…	Prevotella nigrescens	0	97
23	1				AGTCGAGGGGAACGGCATTATGTGCTTGCACATTCTGGACGTCGACCGGCGCACGGGTGAGTATCGCGTATCCAACCTTCCCTCCACTCGGGGATACCCCGTTGAAAGACGGCCTAATACCCGATGTTGTCCACATATGGCATCTGACGTGGACCAAAGGTTCATCGGTGGAGGATGGGGATGCGTCTGATTAGCTTGTTGGTGCGGGTAACGGCCCACCAAGGCGACGATCAGTAGGGGTTCTGAGAGGAAGGTCCCCCACATTGGAACTGAGACACGGTCCAAACTCCTACGGGAGGCAGCAGTGAGGAATATTGGTCAATGGACGGAAGTCTGAACCAGCCAAGTAGCGTGCAGGATTGACGGCCCTATGGGTTGTAAACTGCTTTTGTTGGGGAG…	Prevotella intermedia	0	99
	2				AGTCGAGGGGAACGGCATTATGTGCTTGCACATTCTGGACGTCGACCGGCGCACGGGTGAGTATCGCGTATCCAACCTTCCCTCCACTCGGGGATACCCCGTTGAAAGACGGTCTAATACCCGATGTTGTCCACATATGGCATCTGACGTGGACCAAAGGTTCATCGGTGGAGGATGGGGATGCGTCTGATTAGCTTGTTGGTGCGGGTAACGGCCCACCAAGGCGACGATCAGTAGGGGTTCTGAGAGGAAGGTCCCCCACATTGGAACTGAGACACGGTCCAAACTCCTACGGGAGGCAGCAGTGAGGAATATTGGTCAATGGACGGAAGTCTGAACCAGCCAAGTAGCGTGCAGGATTGACGGCCCTATGGGTTGTAAACTGCTTTTGTTGGGGAG…	Prevotella intermedia	0	99
	3				AGTCGAGGGGAACGGCATTATGTGCTTGCACATTCTGGACGTCGACCGGCGCACGGGTGAGTATCGCGTATCCAACCTTCCCTCCACTCGGGGATACCCCGTTGAAAGACGGTCTAATACCCGATGTTGTCCACATATGGCATCTGACGTGGACCAAAGGTTCATCGGTGGAGGATGGGGATGCGTCTGATTAGCTTGTTGGTGCGGGTAACGGCCCACCAAGGCGACGATCAGTAGGGGTTCTGAGAGGAAGGTCCCCCACATTGGAACTGAGACACGGTCCAAACTCCTACGGGAGGCAGCAGTGAGGAATATTGGTCAATGGACGGAAGTCTGAACCAGCCAAGTAGCGTGCAGGATTGACGGCCCTATGGGTTGTAAACTGCTTTTGTTGGGGAG…	Prevotella intermedia	0	99
24	1				GTCGTGGGGAACGGCATTATGTGCTTGCACATTCTGGACGTCGACCGGCGCACGGGTGAGTATCGCGTATCCAACCTGCCCCTTACTTGGGGATACCCCGTTGAAAGACGGCCTAATACCCGATGTGTTTCATTGACGGCATCCGATATGAAACAAAGGTTTTCCGGTAAGGGATGGGGATGCGTCTGATTAGCTTGTTGGCGGGGCAACGGCCCACCAAGGCGACGATCAGTAGGGGTTCTGAGAGGAAGGTCCCCCACATTGGAACTGAGACACGGTCCAAACTCCTACGGGAGGCAGCAGTGAGGAATATTGGTCAATGGACGCAAGTCTGAACCAGCCAAGTAGCGTGCAGGATGACGGCCCTATGGGTTGTAAACTGCTTTTATGTGGGAATAA…	Prevotella nigrescens	0	99
	2				AGTCGTGGGGAACGGCATTATGTGCTTGCACATTCTGGACGTCGACCGGCGCACGGGTGAGTATCGCGTATCCAACCTGCCCCTTACTTGGGGATACCCCGTTGAAAGACGGCCTAATACCCGATGTGTTTCATTGACGGCATCCGATATGAAACAAAGGTTTTCCGGTAAGGGATGGGGATGCGTCTGATTAGCTTGTTGGCGGGGCAACGGCCCACCAAGGCGACGATCAGTAGGGGTTCTGAGAGGAAGGTCCCCCACATTGGAACTGAGACACGGTCCAAACTCCTACGGGAGGCAGCAGTGAGGAATATTGGTCAATGGACGCAAGTCTGAACCAGCCAAGTAGCGTGCAGGATGACGGCCCTATGGGTTGTAAACTGCTTTTATGTGGGAATA…	Prevotella nigrescens	0	99
	3				AGTCGTGGGGAACGGCATTATGTGCTTGCACATTCTGGACGTCGACCGGCGCACGGGTGAGTATCGCGTATCCAACCTGCCCCTTACTTGGGGATACCCCGTTGAAAGACGGCCTAATACCCGATGTGTTTCATTGACGGCATCCGATATGAAACAAAGGTTTTCCGGTAAGGGATGGGGATGCGTCTGATTAGCTTGTTGGCGGGGCAACGGCCCACCAAGGCGACGATCAGTAGGGGTTCTGAGAGGAAGGTCCCCCACATTGGAACTGAGACACGGTCCAAACTCCTACGGGAGGCAGCAGTGAGGAATATTGGTCAATGGACGCAAGTCTGAACCAGCCAAGTAGCGTGCAGGATGACGGCCCTATGGGTTGTAAACTGCTTTTATGTGGGAATA…	Prevotella nigrescens	0	99
25	1				CTCTGCCTCTGCTACAGCTTGCAGTCGTGGGGAACGGCATTATGTGCTTGCACATTCTGGACGTCGACCGGCGCACGGGTGAGTATCGCGTATCCAACCTGCCCCTTACTTGGGGATACCCCGTTGAAAGACGGCCTAATACCCGATGTGTTTCATTGACGGCATCCGATATGAAACAAAGGTTTTTCCGGTAAGGGATGGGGATGCGTCTGATTAGCTTGTTGGCGGGGCAACGGCCCACCAAGGCGACGATCAGTAGGGGTTCTGAGAGGAAGGTCCCCCACATTGGAACTGAGACACGGTCCAAACTCCTACGGGAGGCAGCAGTGAGGAATATTGGTCAATGGACGCAAGTCTGAACCAGCCAAGTAGCGTGCAGGATGACGGCCCTATGGGTTG…	Prevotella nigrescens	0	97
	2				AGTCGTGGGGAACGGCATTATGTGCTTGCACATTCTGGACGTCGACCGGCGCACGGGTGAGTATCGCGTATCCAACCTGCCCCTTACTTGGGGATACCCCGTTGAAAGACGGCCTAATACCCGATGTGTTTCATTGACGGCATCCGATATGAAACAAAGGTTTTTCCGGTAAGGGATGGGGATGCGTCTGATTAGCTTGTTGGCGGGGCAACGGCCCACCAAGGCGACGATCAGTAGGGGTTCTGAGAGGAAGGTCCCCCACATTGGAACTGAGACACGGTCCAAACTCCTACGGGAGGCAGCAGTGAGGAATATTGGTCAATGGACGCAAGTCTGAACCAGCCAAGTAGCGTGCAGGATGACGGCCCTATGGGTTGTAAACTGCTTTTATGTGGGAAT…	Prevotella nigrescens	0	99
	3				AGTCGTGGGGAACGGCATTATGTGCTTGCACATTCTGGACGTCGACCGGCGCACGGGTGAGTATCGCGTATCCAACCTGCCCCTTACTTGGGGATACCCCGTTGAAAGACGGCCTAATACCCGATGTGTTTCATTGACGGCATCCGATATGAAACAAAGGTTTTTCCGGTAAGGGATGGGGATGCGTCTGATTAGCTTGTTGGCGGGGCAACGGCCCACCAAGGCGACGATCAGTAGGGGTTCTGAGAGGAAGGTCCCCCACATTGGAACTGAGACACGGTCCAAACTCCTACGGGAGGCAGCAGTGAGGAATATTGGTCAATGGACGCAAGTCTGAACCAGCCAAGTAGCGTGCAGGATGACGGCCCTATGGGTTGTAAACTGCTTTTATGTGGGAAT…	Prevotella nigrescens	0	99
26	1				AGTCGTGGGGAACGGCATTATGTGCTTGCACATTCTGGACGTCGACCGGCGCACGGGTGAGTATCGCGTATCCAACCTGCCCCTTACTTGGGGATACCCCGTTGAAAGACGGCCTAATACCCGATGTGTTTCATTGACGGCATCCGATATGAAACAAAGGTTTTCCGGTAAGGGATGGGGATGCGTCTGATTAGCTTGGTGGCGGGGCAACGGCCCACCAAGGCGACGATCAGTAGGGGTTCTGAAAGGAAGGTCCCCCACATTGGAACTGAAACACGGTCCAAACTCCTACGGGAGGCAGCAGTGAGGAATATTGGTCAATGGACGCAAGTCTGAACCAGCCAAGTAGCGTGCAGGATGACGGCCCTATGGGTTGTAAACTGCTTTTATGTGGGAATA…	Prevotella nigrescens	0	99
	2				AGTCGTGGGGAACGGCATTATGTGCTTGCACATTCTGGACGTCGACCGGCGCACGGGTGAGTATCGCGTATCCAACCTGCCCCTTACTTGGGGATACCCCGTCGAAAGACGGCCTAATACCCGATGTGTTTCATTGACGGCATCCGATATGAAACAAAGGTTTTCCGGTAAGGGATGGGGATGCGTCTGATTAGCTTGTTGGCGGGGCAACGGCCCACCAAGGCGACGATCAGTAGGGGTTCTGAAAGGAAGGTCCCCCACATTGGAACTGAAACACGGTCCAAACTCCTACGGGAGGCAGCAGTGAGGAATATTGGTCAATGGACGCAAGTCTGAACCAGCCAAGTAGCGTGCAGGATGACGGCCCTATGGGTTGTAAACTGCTTTTATGTGGGAATA…	Prevotella nigrescens	0	99
	3				AGTCGTGGGGAACGGCATTATGTGCTTGCACATTCTGGACGTCGACCGGCGCACGGGTGAGTATCGCGTATCCAACCTGCCCCTTACTTGGGGATACCCCGTTGAAAGACGGCCTAATACCCGATGTGTTTCATTGACGGCATCCGATATGAAACAAAGGTTTTCCGGTAAGGGATGGGGATGCGTCTGATTAGCTTGTTGGCGGGGCAACGGCCCACCAAGGGGACGATCAGTAGGGGTTCTGAAAGGAAGGTCCCCCACATTGGAACTGAAACACGGTCCAAACTCCTACGGGAGGCAGCAGTGAGGAATATTGGTCAATGGACGCAAGTCTGAACCAGCCAAGTAGCGTGCAGGATGACGGCCCTATGGGTTGTAAACTGCTTTTATGTGGGAATA…	Prevotella nigrescens	0	99
	4				CGTGGGGAAACGGCATTATGTGCTTGCACATTCTGGACGTCGACCGGCGCACGGGTGAGTATCGCGTATCCAACCTGCCCCTTACTTGGGGATACCCCGTTGAAAGACGGCCTAATACCCGATGTGTTTCATTGACGGCATCCGATATGAAACAAAGGTTTTCCGGTAAGGGATGGGGATGCGTCTGATTAGCTAGTTGGCGGGGCAACGGCCCACCAAGGCGACGATCAGTAGGGGTTCTGAGAGGAAGGTCCCCCACATTGGAACTGAGACACGGTCCAAACTCCTACGGGAGGCAGCAGTGAGGAATATTGGTCAATGGACGCAAGTCTGAACCAGCCAAGTAGCGTGCAGGATGACGGCCCTATGGGTTGTAAACTGCTTTTATGTGGGAATAAA…	Prevotella nigrescens	0	99
27	1				CGCGTATCCAACCTGCCCCTTACTTGGGCATACCCCGTTGAAAGACGGCCTAATACCCGATGTGTTTCATTGACGGCATCCGATATGAAACAAAGGTTTTCCGGTAAGGGATGGGGATGCGTCTGATTAGCTTGTTGGCGGGGCAACGGCCCACCAAGGCGACGATCAGTAGGGGTTCTGAAAGGAAGGTCCCCCACATTGGAACTGAAACACGGTCCAAACTCCTACGGGAGGCAGCAGTGAGGAATATTGGTCAATGGACGCAAGTCTGAACCAGCCAAGTAGCGTGCAGGATGACGGCCCTATGGGTTGTAAACTGCTTTTATGTGGGAATAAAGTGGCGCACGTGTGCGCCATTGCATGTACCTCATGAATAAGGACCGGCTAATTCCGTGCCAG…	Prevotella nigrescens	0	99
28	1				TGCTTGCACATTCTGGACGTCGACCGGCGCACGGGTGAGTATCGCGTATCCAACCTGCCCCTTACTTGGGGATACCCCGTTGAAAGACGGCCTAATACCCGATGTGTTTCATTGACGGCATCCGATATGAAACAAAGGTTTTCCGGTGGAGGATGGGGATGCGTCTGATTAGCTTGTTGGCGGGGCAACGGCCCCCCCAGGG	Prevotella nigrescens	4e-91	99
	2				CAGTCGAGGGGAACGGCATTAAGTGCTTGCACTTTTTGGACGTCGACCGGCGCACGGGTGAGTAACGCGTATCCAACCTTCCCATGACTAAGGGATAACCTGCCGAAAGGCAGACTAATACCTTATGGTCTTCACTGACGGCATCAGATGTGAAGTAAAGATTTATCGGTTATGGATGGGGATGCGTCTGATTAGCTTGTTGGCGGGGTAACGGCCCACCAAGGCAACGATCAGTAGGGGTTCTGAGAGGAAGGTCCCCCACATTGGAACTGAGACACGGTCCAAACTCCTACGGGAGGCAGCAGTGAGGAATATTGGTCAATGGGCGAGAGCCTGAACCAGCCAAGTAGCGTGCAGGATGACGGCCCTATGGGTTGTAAACTGCTTTTGTATGGGGAT…	Prevotella histicola	0	99
29	1				AGTCGTGGGGAACGGCATTATGTGCTTGCACATTCTGGACGTCGACCGGCGCACGGGTGAGTATCGCGTATCCAACCTGCCCCTTACTTGGGGATACCCCGTTGAAAGACGGCCTAATACCCGATGTTTTTCATTGACGGCATCCGATATGAAACAAAGGTTTTCCGGTAAGGGATGGGGATGCGTCTGATTATCTTGTTGGGGGGGCAACGGCCCACCAAGGCGACGATCAGTAGGGGTTCTGAGAGGAAGGTCCCCCACATTGGAACTGAGACACGGTCCAAACTCCTACGGGAGGCAGCAGTGAGGAATATTGGTCAATGGACGCAAGTCTGAACCACCCAAGTAGCGTGCAGGATGACGGCCCTATGGGTTGTAAACTGCTTTTATGTGGGAATA…	Prevotella nigrescens	0	98
30	No black-pigmented colony
31	No black-pigmented colony
32	No black-pigmented colony
33	1				AGTCGTGGGGAACGGCATTATGTGCTTGCACATTCTGGACGTCGACCGGCGCACGGGTGAGTATCGCGTATCCAACCTGCCCCTTACTTGGGGATACCCCGTTGAAAGACGGCCTAATACCCGATGTGTTTCATTGACGGCATCCGATATGAAACAAAGGTTTTCCGGTAAGGGATGGGGATGCGTCTGATTAGCTTGTTGGCGGGGCAACGGCCCACCAAGGCGACGATCAGTAGGGGTTCTGAGAGGAAGGTCCCCCACATTGGAACTGAGACACGGTCCAAACTCCTACGGGAGGCAGCAGTGAGGAATATTGGTCAATGGACGCAAGTCTGAACCAGCCAAGTAGCGTGCAGGATGACGGCCCTATGGGTTGTAAACTGCTTTTATGTGGGAATA…	Prevotella nigrescens	0	99
	2				GTCGTGGGGAACGGCATTATGTGCTTGCACATTCTGGACGTCGACCGGCGCACGGGTGAGTATCGCGTATCCAACCTGCCCCTTACTTGGGGATACCCCGTTGAAAGACGGCCTAATACCCGATGTGTTTCATTGACGGCATCCGATATGAAACAAAGGTTTTCCGGTAAGGGATGGGGATGCGTCTGATTAGCTTGTTGGCGGGGCAACGGCCCACCAAGGCGACGATCAGTAGGGGTTCTGAGAGGAAGGTCCCCCACATTGGAACTGAGACACGGTCCAAACTCCTACGGGAGGCAGCAGTGAGGAATATTGGTCAATGGACGCAAGTCTGAACCAGCCAAGTAGCGTGCAGGATGACGGCCCTATGGGTTGTAAACTGCTTTTATGTGGGAATAA…	Prevotella nigrescens	0	99
34	1				GTCGTGGGGAACGGCATTATGTGCTTGCACATTCTGGACGTCGACCGGCGCACGGGTGAGTATCGCGTATCCAACCTGCCCCTTACTTGGGGATACCCCGTTGAAAGACGGCCTAATACCCGATGTGTTTCATTGACGGCATCCGATATGAAACAAAGGTTTTCCGGTAAGGGATGGGGATGCGTCTGATTAGCTAGTTGGCGGGGCAACGGCCCACCAAGGCGACGATCAGTAGGGGTTCTGAGAGGAAGGTCCCCCACATTGGAACTGAGACACGGTCCAAACTCCTACGGGAGGCAGCAGTGAGGAATATTGGTCAATGGACGCAAGTCTGAACCAGCCAAGTAGCGTGCAGGATGACGGCCCTATGGGTTGTAAACTGCTTTTATGTGGGAATAA…	Prevotella nigrescens	0	99
	2				AGTCGTGGGGAACGGCATTATGTGCTTGCACATTCTGGACGTCGACCGGCGCACGGGTGAGTATCGCGTATCCAACCTGCCCCTTACTTGGGGATACCCCGTTGAAAGACGGCCTAATACCCGATGTGTTTCATTGACGGCATCCGATATGAAACAAAGGTTTTCCGGTAAGGGATGGGGATGCGTCTGATTAGCTAGTTGGCGGGGCAACGGCCCACCAAGGCGACGATCAGTAGGGGTTCTGAGAGGAAGGTCCCCCACATTGGAACTGAGACACGGTCCAAACTCCTACGGGAGGCAGCAGTGAGGAATATTGGTCAATGGACGCAAGTCTGAACCAGCCAAGTAGCGTGCAGGATGACGGCCCTATGGGTTGTAAACTGCTTTTATGTGGGAATA…	Prevotella nigrescens	0	99
	3				AGTCGTGGGGAACGGCATTATGTGCTTGCACATTCTGGACGTCGACCGGCGCACGGGTGAGTATCGCGTATCCAACCTGCCCCTTACTTGGGGATACCCCGTTGAAAGACGGCCTAATACCCGATGTGTTTCATTGACGGCATCCGATATGAAACAAAGGTTTTCCGGTAAGGGATGGGGATGCGTCTGATTAGCTAGTTGGCGGGGCAACGGCCCACCAAGGCGACGATCAGTAGGGGTTCTGAGAGGAAGGTCCCCCACATTGGAACTGAGACACGGTCCAAACTCCTACGGGAGGCAGCAGTGAGGAATATTGGTCAATGGACGCAAGTCTGAACCAGCCAAGTAGCGTGCAGGATGACGGCCCTATGGGTTGTAAACTGCTTTTATGTGGGAATA…	Prevotella nigrescens	0	99
35	No black-pigmented colony
36	No black-pigmented colony
37	1				GTCGAGGGGAACGGCATTAAGTGCTTGCACTTTTTGGACGTCGACCGGCGCACGGGTGAGTAACGCGTATCCAACCTTCCCATGACTAAGGGATAACCTGCCGAAAGGCAGACTAATACCTTATGGTCTTCACTGACGGCATCAGATGTGAAGTAAAGATTTATCGGTTATGGATGGGGATGCGTCTGATTAGTTTGTTGGCGGGGTAACGGCCCACCAAGGCAACGATCAGTAGGGGTTCTGAGAGGAAGGTCCCCCACATTGGAACTGAGACACGGTCCAAACTCCTACGGGAGGCAGCAGTGAGGAATATTGGTCAATGGGCGAGAGCCTGAACCAGCCAAGTAGCGTGCAGGACGACGGCCCTATGGGTTGTAAACTGCTTTTGTATGGGGATAA…	Prevotella histicola	0	99
	2				GTCGAGGGGAACGGCATTAAGTGCTTGCACTTTTTGGACGTCGACCGGCGCACGGGTGAGTAACGCGTATCCAACCTTCCCATGACTAAGGGATAACCTGCCGAAAGGCAGACTAATACCTTATGGTCTTCACTGACGGCATCAGATGTGAAGTAAAGATTTATCGGTTATGGATGGGGATGCGTCTGATTAGTTTGTTGGCGGGGTAACGGCCCACCAAGGCAACGATCAGTAGGGGTTCTGAGAGGAAGGTCCCCCACATTGGAACTGAGACACGGTCCAAACTCCTACGGGAGGCAGCAGTGAGGAATATTGGTCAATGGGCGAGAGCCTGAACCAGCCAAGTAGCGTGCAGGACGACGGCCCTATGGGTTGTAAACTGCTTTTGTATGGGGATAA…	Prevotella histicola	0	99
	3				GTCGAGGGGAACGGCATTAAGTGCTTGCACTTTTTGGACGTCGACCGGCGCACGGGTGAGTAACGCGTATCCAACCTTCCCATGACTAAGGGATAACCTGCCGAAAGGCAGACTAATACCTTATGGTCTTCACTGACGGCATCAGATGTGAAGTAAAGATTTATCGGTTATGGATGGGGATGCGTCTGATTAGTTTGTTGGCGGGGTAACGGCCCACCAAGGCAACGATCAGTAGGGGTTCTGAGAGGAAGGTCCCCCACATTGGAACTGAGACACGGTCCAAACTCCTACGGGAGGCAGCAGTGAGGAATATTGGTCAATGGGCGAGAGCCTGAACCAGCCAAGTAGCGTGCAGGACGACGGCCCTATGGGTTGTAAACTGCTTTTGTATGGGGATAA…	Prevotella histicola	0	99
38	No black-pigmented colony
39	1				AGTCGTGGGGAACGGCATTATGTGCTTGCACATTCTGGACGTCGACCGGCGCACGGGTGAGTATCGCGTATCCAACCTGCCCCTTACTTGGGGATACCCCGTTGAAAGACGGCCTAATACCCGATGTGTTTCATTGACGGCATCCGATATGAAACAAAGGTTTTCCGGTAAGGGATGGGGATGCGTCTGATTAGCTTGTTGGCGGGGCAACGGCCCACCAAGGCGACGATCAGTAGGGGTTCTGAGAGGAAGGTCCCCCACATTGGAACTGAGACACGGTCCAAACTCCTACGGGAGGCAGCAGTGAGGAATATTGGTCAATGGACGCAAGTCTGAACCAGCCAAGTAGCGTGCAGGATGACGGCCCTATGGGTTGTAAACTGCTTTTATGTGGGAATA…	Prevotella nigrescens	0	99
	2				AGTCGTGGGGAACGGCATTATGTGCTTGCACATTCTGGACGTCGACCGGCGCACGGGTGAGTATCGCGTATCCAACCTGCCCCTTACTTGGGGATACCCCGTTGAAAGACGGCCTAATACCCGATGTGTTTCATTGACGGCATCCGATATGAAACAAAGGTTTTCCGGTAAGGGATGGGGATGCGTCTGATTAGCTTGTTGGCGGGGCAACGGCCCACCAAGGCGACGATCAGTAGGGGTTCTGAGAGGAAGGTCCCCCACATTGGAACTGAGACACGGTCCAAACTCCTACGGGAGGCAGCAGTGAGGAATATTGGTCAATGGACGCAAGTCTGAACCAGCCAAGTAGCGTGCAGGATGACGGCCCTATGGGTTGTAAACTGCTTTTATGTGGGAATA…	Prevotella nigrescens	0	99
	3				AGTCGTGGGGAACGGCATTATGTGCTTGCACATTCTGGACGTCGACCGGCGCACGGGTGAGTATCGCGTATCCAACCTGCCCCTTACTTGGGGATACCCCGTTGAAAGACGGCCTAATACCCGATGTGTTTCATTGACGGCATCCGATATGAAACAAAGGTTTTCCGGTAAGGGATGGGGATGCGTCTGATTAGCTTGTTGGCGGGGCAACGGCCCACCAAGGCGACGATCAGTAGGGGTTCTGAGAGGAAGGTCCCCCACATTGGAACTGAGACACGGTCCAAACTCCTACGGGAGGCAGCAGTGAGGAATATTGGTCAATGGACGCAAGTCTGAACCAGCCAAGTAGCGTGCAGGATGACGGCCCTATGGGTTGTAAACTGCTTTTATGTGGGAATA…	Prevotella nigrescens	0	99
40	1				AGTCGAGGGGAACGGCATTATGTGCTTGCACATTCTGGACGTCGACCGGCGCACGGGTGAGTATCGCGTATCCAACCTTCCCTCCACTCGGGGATACCCCGTTGAAAGACGGCCTAATACCCGATGTTGTCCACAGATGGCATCTGACGTGGACCAAAGATTCATCGGTGGAGGATGGGGATGCGTCTGATTAGCTTGTTGGTGCGGGTAACGGCCCACCAAGGCAACGATCAGTAGGGGTTCTGAGAGGAAGGTCCCCCACATTGGAACTGAGACACGGTCCAAACTCCTACGGGAGGCAGCAGTGAGGAATATTGGTCAATGGACGTAAGTCTGAACCAGCCAAGTAGCGTGCAGGATTGACGGCCCTATGGGTTGTAAACTGCTTTTGTTGGGGAG…	Prevotella intermedia	0	99
	2				AGTCGAGGGGAACGGCATTATGTGCTTGCACATTCTGGACGTCGACCGGCGCACGGGTGAGTATCGCGTATCCAACCTTCCCTCCACTCGGGGATACCCCGTTGAAAGACGGCCTAATACCCGATGTTGTCCACAGATGGCATCTGACGTGGACCAAAGATTCATCGGTGGAGGATGGGGATGCGTCTGATTAGCTTGTTGGTGCGGGTAACGGCCCACCAAGGCAACGATCAGTAGGGGTTCTGAGAGGAAGGTCCCCCACATTGGAACTGAGACACGGTCCAAACTCCTACGGGAGGCAGCAGTGAGGAATATTGGTCAATGGACGTAAGTCTGAACCAGCCAAGTAGCGTGCAGGATTGACGGCCCTATGGGTTGTAAACTGCTTTTGTTGGGGAG…	Prevotella intermedia	0	99
	3				AGTCGAGGGGAACGGCATTATGTGCTTGCACATTCTGGACGTCGACCGGCGCACGGGTGAGTATCGCGTATCCAACCTTCCCTCCACTCGGGGATACCCCGTTGAAAGACGGCCTAATACCCGATGTTGTCCACAGATGGCATCTGACGTGGACCAAAGATTCATCGGTGGAGGATGGGGATGCGTCTGATTAGCTTGTTGGTGCGGGTAACGGCCCACCAAGGCAACGATCAGTAGGGGTTCTGAGAGGAAGGTCCCCCACATTGGAACTGAGACACGGTCCAAACTCCTACGGGAGGCAGCAGTGAGGAATATTGGTCAATGGACGTAAGTCTGAACCAGCCAAGTAGCGTGCAGGATTGACGGCCCTATGGGTTGTAAACTGCTTTTGTTGGGGAG…	Prevotella intermedia	0	99
41	No black-pigmented colony
42	1				CAGTCGAGGGGAACGGCATTATGTGCTTGCACATTCTGGACGTCGACCGGCGCACGGGTGAGTATCGCGTATCCAACCTTCCCTCCACTCGGGGATACCCCGTTGAAAGACGGCCTAATACCCGATGTTGTCCACATATGGCATCTGACGTGGACCAAAGATTCATCGGTGGAGGATGGGGATGCGTCTGATTAGCTTGTTGGTGCGGGTAACGGCCCACCAAGGCGACGATCAGTAGGGGTTCTGAGAGGAAGGTCCCCCACATTGGAACTGAGACACGGTCCAAACTCCTACGGGAGGCAGCAGTGAGGAATATTGGTCAATGGACGTAAGTCTGAACCAGCCAAGTAGCGTGCAGGATTGACGGCCCTATGGGTTGTAAACTGCTTTTGTTGGGGA…	Prevotella intermedia	0	99
	2				GTCGAGGGGAACGGCATTATGTGCTTGCACATTCTGGACGTCGACCGGCGCACGGGTGAGTATCGCGTATCCAACCTTCCCTCCACTCGGGGATACCCCGTTGAAAGACGGCCTAATACCCGATGTTGTCCACATATGGCATCTGACGTGGACCAAAGATTCATCGGTGGAGGATGGGGATGCGTCTGATTAGCTTGTTGGTGCGGGTAACGGCCCACCAAGGCGACGATCAGTAGGGGTTCTGAGAGGAAGGTCCCCCACATTGGAACTGAGACACGGTCCAAACTCCTACGGGAGGCAGCAGTGAGGAATATTGGTCAATGGACGTAAGTCTGAACCAGCCAAGTAGCGTGCAGGATTGACGGCCCTATGGGTTGTAAACTGCTTTTGTTGGGGAGT…	Prevotella intermedia	0	99
	4				GTCGCGGGGCAGCATGGGGGTTGCTTGCAATCCCTGATGGCGACCGGCGCACGGGTGAGTAACGCGTATCCAACCTGCCCTTCACCACGGGATAACCCGGCGAAAGTCGGACTAATACCGTATGTTGTCCATTGACGGCATCCGATTTGGACGAAAGGCTTAGCGGTGAGGGATGGGGATGCGTCCGATTAGCTCGACGGCGGGGTAACGGCCCACCGTGGCAACGATCGGTAGGGGTTCTGAGAGGAAGGTCCCCCACACTGGAACTGAGACACGGTCCAGACTCCTACGGGAGGCAGCAGTGAGGAATATTGGTCAATGGGCGGAAGCCTGAACCAGCCAAGTAGCGTGCAGGATGACGGCCCTATGGGTTGTAAACTGCTTTTATGCGGGGATAAA…	Prevotella conceptionensis	0	99
43	1				TCGAGGGGAACGGCATTATGTGCTTGCACATTTTGGACGTCGACCGGCGCACGGGTGAGTATCGCGTATCCAACCTTCCCTCCACTCGGGGATACCCCGTTGAAAGACGGCCTAATACCCGATGTTGTCCACATATGGCATCTGACGTGGACCAAAGATTCATCGGTGGAGGATGGGGATGCGTCTGATTAGCTTGTTGGTGCGGGTAACGGCCCACCAAGGCGACGATCAGTAGGGGTTCTGAGAGGAAGGTCCCCCACATTGGAACTGAGACACGGTCCAAACTCCTACGGGAGGCAGCAGTGAGGAATATTGGTCAATGGACGGAAGTCTGAACCAGCCAAGTAGCGTGCAGGATTGACGGCCCTATGGGTTGTAAACTGCTTTTGTTGGGGAGTA…	Prevotella intermedia	0	99
	2				CAGTCGAGGGGAACGGCATTATGTGCTTGCACATTTTGGACGTCGACCGGCGCACGGGTGAGTATCGCGTATCCAACCTTCCCTCCACTCGGGGATACCCCGTTGAAAGACGGCCTAATACCCGATGTTGTCCACATATGGCATCTGACGTGGACCAAAGATTCATCGGTGGAGGATGGGGATGCGTCTGATTAGCTTGTTGGTGCGGGTAACGGCCCACCAAGGCGACGATCAGTAGGGGTTCTGAGAGGAAGGTCCCCCACATTGGAACTGAGACACGGTCCAAACTCCTACGGGAGGCAGCAGTGAGGAATATTGGTCAATGGACGGAAGTCTGAACCAGCCAAGTAGCGTGCAGGATTGACGGCCCTATGGGTTGTAAACTGCTTTTGTTGGGGA…	Prevotella intermedia	0	99
	3				GTCGAGGGGAACGGCATTATGTGCTTGCACATTTTGGACGTCGACCGGCGCACGGGTGAGTATCGCGTATCCAACCTTCCCTCCACTCGGGGATACCCCGTTGAAAGACGGCCTAATACCCGATGTTGTCCACATATGGCATCTGACGTGGACCAAAGATTCATCGGTGGAGGATGGGGATGCGTCTGATTAGCTTGTTGGTGCGGGTAACGGCCCACCAAGGCGACGATCAGTAGGGGTTCTGAGAGGAAGGTCCCCCACATTGGAACTGAGACACGGTCCAAACTCCTACGGGAGGCAGCAGTGAGGAATATTGGTCAATGGACGGAAGTCTGAACCAGCCAAGTAGCGTGCAGGATTGACGGCCCTATGGGTTGTAAACTGCTTTTGTTGGGGAGT…	Prevotella intermedia	0	99
44	1				GTCGTGGGGAACGGCATTATGTGCTTGCACATTCTGGACGTCGACCGGCGCACGGGTGAGTATCGCGTATCCAACCTGCCCCTTACTTGGGGATACCCCGTTGAAAGACGGCCTAATACCCGATGTGTTTCATTGACGGCATCCGATATGAAACAAAGGTTTT	Prevotella nigrescens	9e-77	99
	2				AGTCGTGGGGAACGGCATTATGTGCTTGCACATTCTGGACGTCGACCGGCGCACGGGTGAGTATCGCGTATCCAACCTGCCCCTTACTTGGGGATACCCCGTTGAAAGACGGCCTAATACCCGATGTGTTTCATTGACGGCATCCGATATGAAACAAAGGTTTTTC	Prevotella nigrescens	2e-78	99
	3				CGTGGGGAACGGCATTATGTGCTTGCACATTCTGGACGTCGACCGGCGCACGGGTGAGTATCGCGTATCCAACCTGCCCCTTACTTGGGGATACCCCGTTGAAAGACGGCCTAATACCCGATGTGTTTCATTGACGGCATCCGATATGAAACAAAGGTTTT	Prevotella nigrescens	1e-75	99
45	1				CGAGGGGAACGGCATTATGTGCTTGCACATTTTGGACGTCGACCGGCGCACGGGTGAGTATCGCGTATCCAACCTTCCCTCCACTCGGGGATACCCCGTTGAAAGACGGCCTAATACCCGATGTTGTCCACATATGGCATCTGACGTGGACCAAAGATTCATCGGTGGAGGATGGGGATGCGTCTGATTAGCTTGTTGGTGCGGGTAACGGCCCACCAAGGCAACGATCAGTAGGGGTTCTGAGAGGAAGGTCCCCCACATTGGAACTGAGACACGGTCCAAACTCCTACGGGAGGCAGCAGTGAGGAATATTGGTCAATGGACGTAAGTCTGAACCAGCCAAGTAGCGTGCAGGATTGACGGCCCTATGGGTTGTAAACTGCTTTTGTTGGGGAGTAA…	Prevotella intermedia	0	99
	2				GTCGTGGGGCAGCGGATACTTAGCTTGCTAAGTATGCCGGCGACCGGCGCACGGGTGAGTAACGCGTACCGAACCTGCCCATCACACAGGGATAGGCTTGCGAAAGCAAGATTAATATCTGATGGTCTCAATTTTATGCATGTATGATTGAGTAAAGCCTTCGGGCGGTGATGGATGGCGGTGCGTCCCATTAGGAAGTTGGCGGGGTAACGGCCCACCAATCCTTCGATGGGTAGGGGTTCTGAGAGGAAGGTCCCCCACATTGGAACTGAGATACGGTCCAAACTCCTACGGGAGGCAGCAGTGAGGAATATTGGTCAATGGGCGAGAGCCTGAACCAGCCAAGTAGCGTGCGGGATGAAGGCCCTTGTGGTCGTAAACCGCTTTTATCAGTGAATA…	Alloprevotella tannerae	0	99
	3				GATGCTCATGCTTCCACAAAGCAAGTCGTGGGGCAGCGGATACTTAGCTTGCTAAGTATGCCGGCGACCGGCGCACGGGTGAGTAACGCGTACCGAACCTGCCCATCACACAGGGATAGGCTTGCGAAAGCAAGATTAATATCTGATGGTCTCAATTTTATGCATGTATGATTGAGTAAAGCCTTCGGGCGGTGATGGATGGCGGTGCGTCCCATTAGGAAGTTGGCGGGGTAACGGCCCACCAATCCTTCGATGGGTAGGGGTTCTGAGAGGAAGGTCCCCCACATTGGAACTGAGATACGGTCCAAACTCCTACGGGAGGCAGCAGTGAGGAATATTGGTCAATGGGCGAGAGCCTGAACCAGCCAAGTAGCGTGCGGGATGAAGGCCCTTGTGGTC…	Alloprevotella tannerae	0	99
46	1				GTCGAGGGGAACGGCATTATGTGCTTGCACATTTTGGACGTCGACCGGCGCACGGGTGAGTATCGCGTATCCAACCTTCCCTCCACTCGGGGATACCCCGTTGAAAGACGGCCTAATACCCGATGTTGTCCACATATGGCATCTGACGTGGACCAAAGATTCATCGGTGGAGGATGGGGATGCGTCTGATTAGCTTGTTGGTGCGGGTAACGGCCCACCAAGGCAACGATCAGTAGGGGTTCTGAGAGGAAGGTCCCCCACATTGGAACTGAGACACGGTCCAAACTCCTACGGGAGGCAGCAGTGAGGAATATTGGTCAATGGACGTAAGTCTGAACCAGCCAAGTAGCGTGCAGGATTGACGGCCCTATGGGTTGTAAACTGCTTTTGTTGGGGAGT…	Prevotella intermedia	0	99
	2				GTCGAGGGGCAGCATGATCTTAGCTTGCTAAGGTCGATGGCGACCGGCGCACGGGTGCGTAACGCGTATGCAACTTGCCTTACAGAGGGGGATAACCCGTTGAAAGACGGACTAAAACCGCATACACTTGTATTATTGCATGATATTACAAGGAAATATTTATAGCTGTAAGATAGGCATGCGTCCCATTAGCTGGTTGGTGAGGTAACGGCTCACCAAGGCGACGATGGGTAGGGGAACTGAGAGGTTTATCCCCCACACTGGTACTGAGACACGGACCAGACTCCTACGGGAGGCAGCAGTGAGGAATATTGGTCAATGGGCGAGAGCCTGAACCAGCCAAGTCGCGTGAAGGAAGACTGTCCTAAGGATTGTAAACTTCTTTTATACGGGAATAAC…	Porphyromonas gingivalis	0	99
	3				AGTCGTGGGGAACGGCATTATGTGCTTGCACATTCTGGACGTCGACCGGCGCACGGGTGAGTATCGCGTATCCAACCTGCCCCTTACTTGGGGATACCCCGTTGAAAGACGGCCTAATACCCGATGTGTTTCATTGACGGCATCCGATATGAAACAAAGGTTTTCCGGTAAGGGATGGGGATGCGTCTGATTAGCTTGTTGGCGGGGCAACGGCCCACCAAGGCGACGATCAGTAGGGGTTCTGAGAGGAAGGTCCCCCACATTGGAACTGAGACACGGTCCAAACTCCTACGGGAGGCAGCAGTGAGGAATATTGGTCAATGGACGCAAGTCTGAACCAGCCAAGTAGCGTGCAGGATGACGGCCCTATGGGTTGTAAACTGCTTTTATGTGGGAATA…	Prevotella nigrescens	0	99
47	2				AGTCGTGGGGAACGGCATTATGTGCTTGCACATTCTGGACGTCGACCGGCGCACGGGTGAGTATCGCGTATCCAACCTGCCCCTTACTTGGGGATACCCCGTTGAAAGACGGCCTAATACCCGATGTGTTTCATTGACGGCATCCGATATGAAACAAAGGTTTTTCCGGTAAGGGATGGGGATGCGTCTGATTAGCTTGTTGGCGGGGCAACGGCCCACCAAGGCAACGATCAGTAGGGGTTCTGAGAGGAAGGTCCCCCACATTGGAACTGAAACACGGTCCAAACTCCTACGGGAGGCAGCAGTGAGGAATATTGGTCAATGGACGCAAGTCTGAACCAGCCAAGTAGCGTGCAGGATGACGGCCCTATGGGTTGTAAACTGCTTTTATGTGGGAAT…	Prevotella nigrescens	0	99
	3	?			AGTCGTGGGGAACGGCATTATGTGCTTGCACATTCTGGACGTCGACCGGCGCACGGGTGAGTATCGCGTATCCAACCTGCCCCTTACTTGGGGATACCCCGTTGAAAGACGGCCTAATACCCGATGTGTTTCATTGACGGCATCCGATATGAAACAAAGGTTTTCCGGTAAGGGATGGGGATGCGTCTGATTAGCTTGTTGGCGGGGCAACGGCCCACCAAGGCGACGATCAGTAGGGGTTCTGAGAGGAAGGTCCCCCACATTGGAACTGAGACACGGTCCAAACTCCTACGGGAGGCAGCAGTGAGGAATATTGGTCAATGGACGCAAGTCTGAACCAGCCAAGTAGCGTGCAGGATGACGGCCCTATGGGTTGTAAACTGCTTTTATGTGGGAATA…	Prevotella nigrescens	0	99
	3				AGTCGTGGGGAACGGCATTATGTGCTTGCACATTCTGGACGTCGACCGGCGCACGGGTGAGTATCGCGTATCCAACCTGCCCCTTACTTGGGGATACCCCGTTGAAAGACGGCCTAATACCCGATGTGTTTCATTGACGGCATCCGATATGAAACAAAGGTTTTT	Prevotella nigrescens	7e-78	99
48	1				CGGGTGAGTATCGCGTATCCAACCTGCCCCTTACTTGGGGATACCCCGTTGAAAGACGGCCTAATACCCGATGTGTTTCATTGACGGCATCCGATATGAAACAAAGGTTTTCCGGTAAGGGATGGGGATGCGTCTGATTAGCTTGTTGGCGGGGCAACGGCCCACCAAGGCGACGATCAGTAGGGGTTCTGAGAGGAAGGTCCCCCACATTGGAACTGAGACACGGTCCAAACTCCTACGGGAGGCAGCAGTGAGGAATATTGGTCAATGGACGCAAGTCTGAACCAGCCAAGTAGCGTGCAGGATGACGGCCCTATGGGTTGTAAACTGCTTTTATGTGGGAATAAATTGGCGCACGTGTGCGCCATTGCATGTACCTCATGAATAAGGACCGGCTAA…	Prevotella nigrescens	0	99
	2				GTCGTGGGGAACGGCATTATGTGCTTGCACATTCTGGACGTCGACCGGCGCACGGGTGAGTATCGCGTATCCAACCTGCCCCTTACTTGGGGATACCCCGTTGAAAGACGGCCTAATACCCGATGTGTTTCATTGACGGCATCCGATATGAAACAAAGGTTTTCCGGTAAGGGATGGGGATGCGTCTGATTAGCTTGTTGGCGGGGCAACGGCCCACCAAGGCGACGATCAGTAGGGGTTCTGAGAGGAAGGTCCCCCACATTGGAACTGAGACACGGTCCAAACTCCTACGGGAGGCAGCAGTGAGGAATATTGGTCAATGGACGCAAGTCTGAACCAGCCAAGTAGCGTGCAGGATGACGGCCCTATGGGTTGTAAACTGCTTTTATGTGGGAATAA…	Prevotella nigrescens	0	99
	3				GTCGTGGGGAACGGCATTATGTGCTTGCACATTCTGGACGTCGACCGGCGCACGGGTGAGTATCGCGTATCCAACCTGCCCCTTACTTGGGGATACCCCGTTGAAAGACGGCCTAATACCCGATGTGTTTCATTGACGGCATCCGATATGAAACAAAGGTTTTCCGGTAAGGGATGGGGATGCGTCTGATTAGCTTGTTGGCGGGGCAACGGCCCACCAAGGCGACGATCAGTAGGGGTTCTGAGAGGAAGGTCCCCCACATTGGAACTGAGACACGGTCCAAACTCCTACGGGAGGCAGCAGTGAGGAATATTGGTCAATGGACGCAAGTCTGAACCAGCCAAGTAGCGTGCAGGATGACGGCCCTATGGGTTGTAAACTGCTTTTATGTGGGAATAA…	Prevotella nigrescens	0	99
49	1				GTCGTGGGGCAGCGGATACTTAGCTTGCTAAGTATGCCGGCGACCGGCGCACGGGTGAGTAACGCGTACCGAACCTGCCCATCACACAGGGATAGGCTTGCGAAAGCAAGATTAATATCTGATGGTCTCAGTTGTATGCATGTATGATTGAGTAAAGCCTTCGGGCGGTGATGGATGGCGGTGCGTCCCATTAGGAAGTTGGCGGGGTAACGGCCCACCAATCCTTCGATGGGTAGGGGTTCTGAGAGGAAGGTCCCCCACATTGGAACTGAGATACGGTCCAAACTCCTACGGGAGGCAGCAGTGAGGAATATTGGTCAATGGGCGAGAGCCTGAACCAGCCAAGTAGCGTGCGGGATGAAGGCCCTTGTGGTCGTAAACCGCTTTTATCAGTGAATA…	Prevotella tannerae	0	99
	2				GTCGTGGGGCAGCGGATACTTAGCTTGCTAAGTATGCCGGCGACCGGCGCACGGGTGAGTAACGCGTACCGAACCTGCCCATCACACAGGGATAGGCTTGCGAAAGCAAGATTAATATCTGATGGTCTCAGTTGTATGCATGTATGATTGAGTAAAGCCTTCGGGCGGTGATGGATGGCGGTGCGTCCCATTAGGAAGTTGGCGGGGTAACGGCCCACCAATCCTTCGATGGGTAGGGGTTCTGAGAGGAAGGTCCCCCACATTGGAACTGAGATACGGTCCAAACTCCTACGGGAGGCAGCAGTGAGGAATATTGGTCAATGGGCGAGAGCCTGAACCAGCCAAGTAGCGTGCGGGATGAAGGCCCTTGTGGTCGTAAACCGCTTTTATCAGTGAATA…	Prevotella tannerae	0	99
	3				GTCGTGGGGCAGCGGATACTTAGCTTGCTAAGTATGCCGGCGACCGGCGCACGGGTGAGTAACGCGTACCGAACCTGCCCATCACACAGGGATAGGCTTGCGAAAGCAAGATTAATATCTGATGGTCTCAGTTGTATGCATGTATGATTGAGTAAAGCCTTCGGGCGGTGATGGATGGCGGTGCGTCCCATTAGGAAGTTGGCGGGGTAACGGCCCACCAATCCTTCGATGGGTAGGGGTTCTGAGAGGAAGGTCCCCCACATTGGAACTGAGATACGGTCCAAACTCCTACGGGAGGCAGCAGTGAGGAATATTGGTCAATGGGCGAGAGCCTGAACCAGCCAAGTAGCGTGCGGGATGAAGGCCCTTGTGGTCGTAAACCGCTTTTATCAGTGAATA…	Prevotella tannerae	0	99
	4				GTCGTGGGGCAGCGGATACTTAGCTTGCTAAGTATGCCGGCGACCGGCGCACGGGTGAGTAACGCGTACCGAACCTGCCCATCACACAGGGATAGGCTTGCGAAAGCAAGATTAATATCTGATGGTCTCAGTTGTATGCATGTATGATTGAGTAAAGCCTTCGGGCGGTGATGGATGGCGGTGCGTCCCATTAGGAAGTTGGCGGGGTAACGGCCCACCAATCCTTCGATGGGTAGGGGTTCTGAGAGGAAGGTCCCCCACATTGGAACTGAGATACGGTCCAAACTCCTACGGGAGGCAGCAGTGAGGAATATTGGTCAATGGGCGAGAGCCTGAACCAGCCAAGTAGCGTGCGGGATGAAGGCCCTTGTGGTCGTAAACCGCTTTTATCAGTGAATA…	Prevotella tannerae	0	99
50	1				AGTCGTGGGGAACGGCATTATGTGCTTGCACATTCTGGACGTCGACCGGCGCACGGGTGAGTATCGCGTATCCAACCTGCCCCTTACTTGGGGATACCCCGTTGAAAGACGGCCTAATACCCGATGTGTTTCATTGACGGCATCCGATATGAAACAAAGGTTTTCCGGTAAGGGATGGGGATGCGTCTGATTAGCTTGTTGGCGGGGCAACGGCCCACCAAGGCGACGATCAGTAGGGGTTCTGAGAGGAAGGTCCCCCACATTGGAACTGAGACACGGTCCAAACTCCTACGGGAGGCAGCAGTGAGGAATATTGGTCAATGGACGCAAGTCTGAACCAGCCAAGTAGCGTGCAGGATGACGGCCCTATGGGTTGTAAACTGCTTTTATGTGGGAATA…	Prevotella nigrescens	0	99
	2				AGTCGTGGGGAACGGCATTATGTGCTTGCACATTCTGGACGTCGACCGGCGCACGGGTGAGTATCGCGTATCCAACCTGCCCCTTACTTGGGGATACCCCGTTGAAAGACGGCCTAATACCCGATGTGTTTCATTGACGGCATCCGATATGAAACAAAGGTTTTCCGGTAAGGGATGGGGATGCGTCTGATTAGCTTGTTGGCGGGGCAACGGCCCACCAAGGCGACGATCAGTAGGGGTTCTGAGAGGAAGGTCCCCCACATTGGAACTGAGACACGGTCCAAACTCCTACGGGAGGCAGCAGTGAGGAATATTGGTCAATGGACGCAAGTCTGAACCAGCCAAGTAGCGTGCAGGATGACGGCCCTATGGGTTGTAAACTGCTTTTATGTGGGAATA…	Prevotella nigrescens	0	99
	3				TGGGGAACGGCATTATGTGCTTGCACATTCTGGACGTCGACCGGCGCACGGGTGAGTATCGCGTATCCAACCTGCCCCTTACTTGGGGATACCCCGTTGAAAGACGGCCTAATACCCGATGTGTTTCATTGACGGCATCCGATATGAAACAAAGGTTTTCCGGTAAGGGATGGGGATGCGTCTGATTAGCTTGTTGGCGGGGCAACGGCCCACCAAGGCGACGATCAGTAGGGGTTCTGAGAGGAAGGTCCCCCACATTGGAACTGAGACACGGTCCAAACTCCTACGGGAGGCAGCAGTGAGGAATATTGGTCAATGGACGCAAGTCTGAACCAGCCAAGTAGCGTGCAGGATGACGGCCCTATGGGTTGTAAACTGCTTTTATGTGGGAATAAAGTG…	Prevotella nigrescens	0	99
51	1				TCGTGGGGCAGCGGATACTTAGCTTGCTAAGTATGCCGGCGACCGGCGCACGGGTGAGTAACGCGTACCGAACCTGCCCATCACACAGGGATAGGCTTGCGAAAGCAAGATTAATACCTGATGGTCTCAATTTTATGCATGTATGATTGAGTAAAGCCTTCGGGCGGTGATGGATGGCGGTGCGTCCCATTAGGAAGTTGGCGGGGTAACGGCCCACCAATCCTTCGATGGGTAGGGGTTCTGAGAGGAAGGTCCCCCACATTGGAACTGAGATACGGTCCAAACTCCTACGGGAGGCAGCAGTGAGGAATATTGGTCAATGGGCGAGAGCCTGAACCAGCCAAGTAGCGTGCGGGATGAAGGCCCTTGTGGTCGTAAACCGCTTTTATCAGTGAATAA…	Prevotella tannerae	0	99
	2				TCGTGGGGCAGCGGATACTTAGCTTGCTAAGTATGCCGGCGACCGGCGCACGGGTGAGTAACGCGTACCGAACCTGCCCATCACACAGGGATAGGCTTGCGAAAGCAAGATTAATACCTGATGGTCTCAATTTTATGCATGTATGATTGAGTAAAGCCTTCGGGCGGTGATGGATGGCGGTGCGTCCCATTAGGAAGTTGGCGGGGTAACGGCCCACCAATCCTTCGATGGGTAGGGGTTCTGAGAGGAAGGTCCCCCACATTGGAACTGAGATACGGTCCAAACTCCTACGGGAGGCAGCAGTGAGGAATATTGGTCAATGGGCGAGAGCCTGAACCAGCCAAGTAGCGTGCGGGATGAAGGCCCTTGTGGTCGTAAACCGCTTTTATCAGTGAATAA…	Prevotella tannerae	0	99
	3				TTGCGAAAGCAAGATTAATACCTGATGGTCTCAATTTTATGCATGTATGATTGAGTAAAGCCTTCGGGCGGTGATGGATGGCGGTGCGTCCCATTAGGAAGTTGGCGGGGTAACGGCCCACCAATCCTTCGATGGGTAGGGGTTCTGAGAGGAAGGTCCCCCACATTGGAACTGAGATACGGTCCAAACTCCTACGGGAGGCAGCAGTGAGGAATATTGGTCAATGGGCGAGAGCCTGAACCAGCCAAGTAGCGTGCGGGATGAAGGCCCTTGTGGTCGTAAACCGCTTTTATCAGTGAATAAAGTGCACCACGTGTGGTGTCATTGCAGGTAGCTGAAGAAAAAGGACCGGCTAATTCCGTGCCAGCAGCCGCGGTAATACGGAAGGTCCGGGCGTTA…	Prevotella tannerae	0	99
52	1				GTCGTGGGGAACGGCATTATGTGCTTGCACATTCTGGACGTCGACCGGCGCACGGGTGAGTATCGCGTATCCAACCTGCCCCTTACTTGGGGATACCCCGTTGAAAGACGGCCTAATACCCGATGTGTTTCATTGACGGCATCCGATATGAAACAAAGGTTTTCCGGTAAGGGATGGGGATGCGTCTGATTAGCTTGTTGGCGGGGCAACGGCCCACCAAGGCGACGATCAGTAGGGGTTCTGAGAGGAAGGTCCCCCACATTGGAACTGAGACACGGTCCAAACTCCTACGGGAGGCAGCAGTGAGGAATATTGGTCAATGGACGCAAGTCTGAACCAGCCAAGTAGCGTGCAGGATGACGGCCCTATGGGTTGTAAACTGCTTTTATGTGGGAATAA…	Prevotella nigrescens	0	99
	2				AGTCGTGGGGAACGGCATTATGTGCTTGCACATTCTGGACGTCGACCGGCGCACGGGTGAGTATCGCGTATCCAACCTGCCCCTTACTTGGGGATACCCCGTTGAAAGACGGCCTAATACCCGATGTGTTTCATTGACGGCATCCGATATGAAACAAAGGTTTTCCGGTAAGGGATGGGGATGCGTCTGATTAGCTTGTTGGCGGGGCAACGGCCCACCAAGGCGACGATCAGTAGGGGTTCTGAGAGGAAGGTCCCCCACATTGGAACTGAGACACGGTCCAAACTCCTACGGGAGGCAGCAGTGAGGAATATTGGTCAATGGACGCAAGTCTGAACCAGCCAAGTAGCGTGCAGGATGACGGCCCTATGGGTTGTAAACTGCTTTTATGTGGGAATA…	Prevotella nigrescens	0	99
	3				GTCGAGGGGAACGGCATTGTGGTGCTTGCACCGTAATGGACGTCGACCGGCGCACGGGTGAGTAACGCGTATCCAACCTTCCCGTTACTGCGGGATAACCTGCCGAAAGGCAGACTAATACCGCATGTTCTTCGATGACGGCATCAGATTCGAAGCAAAGATCCGTCGGTAAGGGAGGGGGATGCGTCTGATTAGCTAGTTGGCGGGGCGACGGCCCACCAAGGCGACGATCAGTAGGGGTTCTGAGAGGAAGGTCCCCCACATTGGAACTGAGACACGGTCCAAACTCCTACGGGAGGCAGCAGTGAGGAATATTGGTCAATGGGCGGAAGCCTGAACCAGCCAAGTAGCGTGCAGGATGACGGCCCTACGGGTTGTAAACTGCTTTTATGCGGGGAT…	Prevotella denticola	0	99
53	1				GCATTGAGTGCTTGCACTCTTTGGACGTCGACCGGCGCACGGGTGAGTAACGCGTATCCAACCTTCCCATTACTGTGGAATAACCTGCCGAAAGGCAGACTAATACCGCATGGTCTTCGATGACGGCATCAGATTTGAAGTAAAGATTTATCGGTAATGGATGGGGATGCGTCTGATTAGCTTGTTGGCGGGGTAACGGCCCACCAAGGCGACGATCAGTAGGGGTTCTGAGAGGAAGGTCCCCCACATTGGAACTGAGACACGGTCCAAACTCCTACGGGAGGCA	Prevotella melaninogenica	0	98
54	1				AGTCGAGGGGAACGGCATTATGTGCTTGCACATTTTGGACGTCGACCGGCGCACGGGTGAGTATCGCGTATCCAACCTTCCCTCCACTCGGGGATACCCCGTTGAAAGACGGCCTAATACCCGATGTTGTCCACATATGGCATCTGACGTGGACCAAAGATTCATCGGTGGAGGATGGGGATGCGTCTGATTAGCTTGTTGGTGCGGGTAACGGCCCACCAAGGCTACGATCAGTAGGGGTTCTGAGAGGAAGGTCCCCCACATTGGAACTGAGACACGGTCCAAACTCCTACGGGAGGCAGCAGTGAGGAATATTGGTCAATGGACGTAAGTCTGAACCAGCCAAGTAGCGTGCAGGATTGACGGCCCTATGGGTTGTAAACTGCTTTTGTTGGGGAG…	Prevotella intermedia	0	99
	2				TGCTTGCACTCTTTGGACGTCGACCGGCGCACGGGTGAGTAACGCGTATCCAACCTTCCCGTTACTGCGGGATAACCTGCCGAAAGGCAGACTAATACCGCATGTTCTTCGATGACGGCATCAGATTCGAAGCAAAGATTTGTCGGTAACGGAGGGGGATGCGTCTGATTAGCTTGTTGGCGGGGCAACGGCCCACCAAGGCGACGATCAGTAGGGGTTCTGAGAGGAAGGTCCCCCACATTGGAACTGAGACACGGTCCAAACTCCTACGGGAGGCAGCAGTGAGGAATATTGGTCAATGGGCGGAAGCCTGAACCAGCCAAGTAGCGTGCAGGAGGACGGCCCTATGGGTTGTAAACTGCTTTTATGCGGGGATAAAGTGAGGGACGTGTCCCTTTT…	Prevotella denticola	0	99
	3				GCATTATGTGCTTGCACATTCTGGACGTCGACCGGCGCACGGGTGAGTATCGCGTATCCAACCTTCCCTCCACTCGGGGATACCCCGTTGAAAGGCGGCCTAATACCCGATGTTGTCCACATATGGCATCTGACGTGGACCAAAGATTCATCGGTGGAGGATGGGGATGCGTCTGATTAGCTTGTTGGTGCGGGTAACGGCCCACCAAGGCGACGATCAGTAGGGGTTCTGAGAGGAAGGTCCCCCACATTGGAACTGAGACACGGTCCAAACTCCTACGGGAGGCAGCAGTGAGGAATATTGGTCAATGGACGTAAGTCTGAACCAGCCAAGTAGCGTGCAGGATTGACGGCCCTATGGGTTGTAAACTGCTTTTGTTGGGGAGTAAAGTGAGGCACG…	Prevotella intermedia	0	99
55	1				GTCGTGGGGAAACGGCATTATGTGCTTGCACATTCTGGACGTCGACCGGCGCACGGGTGAGTATCGCGTATCCAACCTGCCCCTTACTTGGGGATACCCCGTCGAAAGACGGCCTAATACCCGATGTGTTTCATTGACGGCATCCGATATGAAACAAAGGTTTTTTCCGGTAAGGGATGGGGATGCGTCTGATTATCTTGTTGGCGGGGCAACGGCCCACCAAGGCGACGATCAGTAGGGGTTCTGAGAGGAAGGTCCCCCACATTGGAACTGAGACACGGTCCAAACTCCTACGGGAGGCAGCAGTGAGGAATATTGGTCAATGGACGCAAGTCTGAACCAGCCAAGTAGCGTGCAGGATGACGGCCCTATGGGTTGTAAACTGCTTTTATGTGGGAA…	Prevotella nigrescens	0	99
	2				AGTCGTGGGGAACGGCATTATGTGCTTGCACATTCTGGACGTCGACCGGCGCACGGGTGAGTATCGCGTATCCAACCTGCCCCTTACTTGGGGATACCCCGTTGAAAGACGGCCTAATACCCGATGTGTTTCATTGACGGCATCCGATATGAAACAAAGGTTTTTTCCGGTAAGGGATGGGGATGCGTCTGATTATCTTGTTGGCGGGGCAACGGCCCACCAAGGCGACGATCAGTAGGGGTTCTGAGAGGAAGGTCCCCCACATTGGAACTGAGACACGGTCCAAACTCCTACGGGAGGCAGCAGTGAGGAATATTGGTCAATGGACGCAAGTCTGAACCAGCCAAGTAGCGTGCAGGATGACGGCCCTATGGGTTGTAAACTGCTTTTATGTGGGAA…	Prevotella nigrescens	0	99
	3				GCATTATGTGCTTGCACATTCTGGACGTCGACCGGCGCACGGGTGAGTATCGCGTATCCAACCTGCCCCTTACTTGGGGATACCCCGTCGAAAGACGGCCTAATACCCGATGTGTTTCATTGACGGCATCCGATATGAAACAAAGGTTTTTTCCGGTAAGGGATGGGGATGCGTCTGATTAGCTTGTTGGCGGGGCAACGGCCCACCAAGGCGACGATCAGTAGGGGTTCTGAGAGGAAGGTCCCCCACATTGGAACTGAGACACGGTCCAAACTCCTACGGGAGGCAGCAGTGAGGAATATTGGTCAATGGACGCAAGTCTGAACCAGCCAAGTAGCGTGCAGGATGACGGCCCTATGGGTTGTAAACTGCTTTTATGTGGGAATAAAGTGGCGCACG…	Prevotella nigrescens	0	99
56	1				GTCGAGGGGAACGGCATTATGTGCTTGCACATTCTGGACGTCGACCGGCGCACGGGTGAGTATCGCGTATCCAACCTTCCCTCCACTCGGGGATACCCCGTTGAAAGACGGCCTAATACCCGATGTTGTCCACATATGGCATCTGACGTGGACCAAAGATTCATCGGTGGAGGATGGGGATGCGTCTGATTAGCTTGTTGGTGCGGGTAACGGCCCACCAAGGCTACGATCAGTAGGGGTTCTGAGAGGAAGGTCCCCCACATTGGAACTGAGACACGGTCCAAACTCCTACGGGAGGCAGCAGTGAGGAATATTGGTCAATGGACGGAAGTCTGAACCAGCCAAGTAGCGTGCAGGATTGACGGCCCTATGGGTTGTAAACTGCTTTTGTTGGGGAGT…	Prevotella intermedia	0	99
	2				GTCGAGGGGAACGGCATTATGTGCTTGCACATTCTGGACGTCGACCGGCGCACGGGTGAGTATCGCGTATCCAACCTTCCCTCCACTCGGGGATACCCCGTTGAAAGACGGCCTAATACCCGATGTTGTCCACATATGGCATCTGACGTGGACCAAAGATTCATCGGTGGAGGATGGGGATGCGTCTGATTAGCTTGTTGGTGCGGGTAACGGCCCACCAAGGCTACGATCAGTAGGGGTTCTGAGAGGAAGGTCCCCCACATTGGAACTGAGACACGGTCCAAACTCCTACGGGAGGCAGCAGTGAGGAATATTGGTCAATGGACGGAAGTCTGAACCAGCCAAGTAGCGTGCAGGATTGACGGCCCTATGGGTTGTAAACTGCTTTTGTTGGGGAGT…	Prevotella intermedia	0	99
	3				CAGTCGAGGGGAACGGCATTATGTGCTTGCACATTCTGGACGTCGACCGGCGCACGGGTGAGTATCGCGTATCCAACCTTCCCTCCACTCGGGGATACCCCGTTGAAAGACGGCCTAATACCCGATGTTGTCCACATATGGCATCTGACGTGGACCAAAGATTCATCGGTGGAGGATGGGGATGCGTCTGATTAGCTTGTTGGTGCGGGTAACGGCCCACCAAGGCTACGATCAGTAGGGGTTCTGAGAGGAAGGTCCCCCACATTGGAACTGAGACACGGTCCAAACTCCTACGGGAGGCAGCAGTGAGGAATATTGGTCAATGGACGGAAGTCTGAACCAGCCAAGTAGCGTGCAGGATTGACGGCCCTATGGGTTGTAAACTGCTTTTGTTGGGGA…	Prevotella intermedia	0	99
57	1				AGTCGTGGGGAACGGCATTATGTGCTTGCACATTCTGGACGTCGACCGGCGCACGGGTGAGTATCGCGTATCCAACCTGCCCCTTACTTGGGGATACCCCGTTGAAAGACGGCCTAATACCCGATGTGTTTCATTGACGGCATCCGATATGAAACAAAGGTTTTCCGGTAAGGGATGGGGATGCGTCTGATTAGCTTGTTGGCGGGGCAACGGCCCACCAAGGCGACGATCAGTAGGGGTTCTGAGAGGAAGGTCCCCCACATTGGAACTGAGACACGGTCCAAACTCCTACGGGAGGCAGCAGTGAGGAATATTGGTCAATGGACGCAAGTCTGAACCAGCCAAGTAGCGTGCAGGATGACGGCCCTATGGGTTGTAAACTGCTTTTATGTGGGAATA…	Prevotella nigrescens	0	99
	2				AGTCGTGGGGAACGGCATTATGTGCTTGCACATTCTGGACGTCGACCGGCGCACGGGTGAGTATCGCGTATCCAACCTGCCCCTTACTTGGGGATACCCCGTTGAAAGACGGCCTAATACCCGATGTGTTTCATTGACGGCATCCGATATGAAACAAAGGTTTTCCGGTAAGGGATGGGGATGCGTCTGATTAGCTTGTTGGCGGGGCAACGGCCCACCAAGGCGACGATCAGTAGGGGTTCTGAGAGGAAGGTCCCCCACATTGGAACTGAGACACGGTCCAAACTCCTACGGGAGGCAGCAGTGAGGAATATTGGTCAATGGACGCAAGTCTGAACCAGCCAAGTAGCGTGCAGGATGACGGCCCTATGGGTTGTAAACTGCTTTTATGTGGGAATA…	Prevotella nigrescens	0	99
	3				AGTCGTGGGGAACGGCATTATGTGCTTGCACATTCTGGACGTCGACCGGCGCACGGGTGAGTATCGCGTATCCAACCTGCCCCTTACTTGGGGATACCCCGTTGAAAGACGGCCTAATACCCGATGTGTTTCATTGACGGCATCCGATATGAAACAAAGGTTTTCCGGTAAGGGATGGGGATGCGTCTGATTAGCTTGTTGGCGGGGCAACGGCCCACCAAGGCGACGATCAGTAGGGGTTCTGAGAGGAAGGTCCCCCACATTGGAACTGAGACACGGTCCAAACTCCTACGGGAGGCAGCAGTGAGGAATATTGGTCAATGGACGCAAGTCTGAACCAGCCAAGTAGCGTGCAGGATGACGGCCCTATGGGTTGTAAACTGCTTTTATGTGGGAATA…	Prevotella nigrescens	0	99
58	1				AGTCGTGGGGAACGGCATTATGTGCTTGCACATTCTGGACGTCGACCGGCGCACGGGTGAGTATCGCGTATCCAACCTGCCCCTTACTTGGGGATACCCCGTTGAAAGACGGCCTAATACCCGATGTGTTTCATTGACGGCATCCGATATGAAACAAAGGTTTTCCGGTAAGGGATGGGGATGCGTCTGATTAGCTTGTTGGCGGGGCAACGGCCCACCAAGGCGACGATCAGTAGGGGTTCTGAGAGGAAGGTCCCCCACATTGGAACTGAGACACGGTCCAAACTCCTACGGGAGGCAGCAGTGAGGAATATTGGTCAATGGACGCAAGTCTGAACCAGCCAAGTAGCGTGCAGGATGACGGCCCTATGGGTTGTAAACTGCTTTTATGTGGGAATA…	Prevotella nigrescens	0	99
	2				AGTCGTGGGGAACGGCATTATGTGCTTGCACATTCTGGACGTCGACCGGCGCACGGGTGAGTATCGCGTATCCAACCTGCCCCTTACTTGGGGATACCCCGTTGAAAGACGGCCTAATACCCGATGTGTTTCATTGACGGCATCCGATATGAAACAAAGGTTTTCCGGTAAGGGATGGGGATGCGTCTGATTAGCTTGTTGGCGGGGCAACGGCCCACCAAGGCGACGATCAGTAGGGGTTCTGAGAGGAAGGTCCCCCACATTGGAACTGAGACACGGTCCAAACTCCTACGGGAGGCAGCAGTGAGGAATATTGGTCAATGGACGCAAGTCTGAACCAGCCAAGTAGCGTGCAGGATGACGGCCCTATGGGTTGTAAACTGCTTTTATGTGGGAATA…	Prevotella nigrescens	0	99
	3				GTCGTGGGGAACGGCATTATGTGCTTGCACATTCTGGACGTCGACCGGCGCACGGGTGAGTATCGCGTATCCAACCTGCCCCTTACTTGGGGATACCCCGTTGAAAGACGGCCTAATACCCGATGTGTTTCATTGACGGCATCCGATATGAAACAAAGGTTTTCCGGTAAGGGATGGGGATGCGTCTGATTAGCTTGTTGGCGGGGCAACGGCCCACCAAGGCGACGATCAGTAGGGGTTCTGAGAGGAAGGTCCCCCACATTGGAACTGAGACACGGTCCAAACTCCTACGGGAGGCAGCAGTGAGGAATATTGGTCAATGGACGCAAGTCTGAACCAGCCAAGTAGCGTGCAGGATGACGGCCCTATGGGTTGTAAACTGCTTTTATGTGGGAATAA…	Prevotella nigrescens	0	99
59	1				TTATGTGCTTGCACATTCTGGACGTCGACCGGCGCACGGGTGAGTATCGCGTATCCAACCTGCCCCTTACTTGGGGATACCCCGTCGAAAGACGGCCTAATACCCGATGTGTTTCATTGACGGCATCCGATATGAAACAAAGGTTTTCCGGTAAGGGATGGGGATGCGTCTGATTAGCTTGTTGG	Prevotella nigrescens	1e-90	100
	2				AGTCGTGGGGAACGGCATTATGTGCTTGCACATTCTGGACGTCGACCGGCGCACGGGTGAGTATCGCGTATCCAACCTGCCCCTTACTTGGGGATACCCCGTCGAAAGACGGCCTAATACCCGATGTGTTTCATTGACGGCATCCGATATGAAACAAAGGTTTTCCGGTAAGGGATGGGGATGCGTCTGATTAGCTTGTTGGCGGGGCAACGGCCCACCAAGGCGACGATCAGTAGGGGTTCTGAGAGGAAGGTCCCCCACATTGGAACTGAGACACGGTCCAAACTCCTACGGGAGGCAGCAGTGAGGAATATTGGTCAATGGACGCAAGTCTGAACCAGCCAAGTAGCGTGCAGGATGACGGCCCTATGGGTTGTAAACTGCTTTTATGTGGGAATA…	Prevotella nigrescens	0	99
	3				GTCGTGGGGAACGGCATTATGTGCTTGCACATTCTGGACGTCGACCGGCGCACGGGTGAGTATCGCGTATCCAACCTGCCCCTTACTTGGGGATACCCCGTTGAAAGACGGCCTAATACCCGATGTGTTTCATTGACGGCATCCGATATGAAACAAAGGTTTTCCGGTAAGGGATGGGGATGCGTCTGATTAGCTTGTTGGCGGGGCAACGGCCCACCAAGGCGACGATCAGTAGGGGTTCTGAGAGGAAGGTCCCCCACATTGGAACTGAGACACGGTCCAAACTCCTACGGGAGGCAGCAGTGAGGAATATTGGTCAATGGACGCAAGTCTGAACCAGCCAAGTAGCGTGCAGGATGACGGCCCTATGGGTTGTAAACTGCTTTTATGTGGGAATAA…	Prevotella nigrescens	0	99
60	1				GTCGTGGGGAACGGCATTATGTGCTTGCACATTCTGGACGTCGACCGGCGCACGGGTGAGTATCGCGTATCCAACCTGCCCCTTACTTGGGGATACCCCGTTGAAAGACGGCCTAATACCCGATGTGTTTCATTGACGGCATCCGATATGAAACAAAGGTTTT	Prevotella nigrescens	9e-77	99
	2				AGTCGTGGGGAACGGCATTATGTGCTTGCACATTCTGGACGTCGACCGGCGCACGGGTGAGTATCGCGTATCCAACCTGCCCCTTACTTGGGGATACCCCGTTGAAAGACGGCCTAATACCCGATGTGTTTCATTGACGGCATCCGATATGAAACAAAGGTTTT	Prevotella nigrescens	3e-77	99
	3				GTCGTGGGGAACGGCATTATGTGCTTGCACATTCTGGACGTCGACCGGCGCACGGGTGAGTATCGCGTATCCAACCTGCCCCTTACTTGGGGATACCCCGTTGAAAGACGGCCTAATACCCGATGTGTTTCATTGACGGCATCCGATATGAAACAAAGGTTTT	Prevotella nigrescens	9e-77	99
61	1
	2
	3
62	1				TGGGGAACGGCATTATGTGCTTGCACATTCTGGACGTCGACCGGCGCACGGGTGAGTATCGCGTATCCAACCTGCCCCTTACTTGGGGATACCCCGTTGAAAGACGGCCTAATACCCGATGTGTTTCATTGACGGCATCCGATATGAAACAAAGGTTTTCCGGGAAGGGATGGGGATGCGTCTGATTAGCTAGGTGGGGGGGCAACGGCCCACCAAGGCGACGATCAGTAGGGGTTCTGAAAGGAAGGTCCCCCACATTGGAACTGAAACACGGTCCAAACTCCTACGGGAGGCAGCAGTGAGGAATATTGGTCAATGGACGCAAGTCTGAACCAGCCAAGTAGCGTGCAGGATGACGGCCCTATGGGTTGTAAACTGCTTTTATGTGGGAATAAAGTG…	Prevotella nigrescens	0	99
	2				GTCGTGGGGAACGGCATTATGTGCTTGCACATTCTGGACGTCGACCGGCGCACGGGTGAGTATCGCGTATCCAACCTGCCCCTTACTTGGGGATACCCCGTTGAAAGACGGCCTAATACCCGATGTGTTTCATTGACGGCATCCGATATGAAACAAAGGTTTTCCGGGAAGGGATGGGGATGCGTCTGATTAGCTAGGTGGGGGGGCAACGGCCCACCAAGGGGACGATCAGTAGGGGTTCTGAAAGGAAGGTCCCCCACATTGGAACTGAAACACGGTCCAAACTCCTACGGGAGGCAGCAGTGAGGAATATTGGTCAATGGACGCAAGTCTGAACCAGCCAAGTAGCGTGCAGGATGACGGCCCTATGGGTTGTAAACTGCTTTTATGTGGGAATAA…	Prevotella nigrescens	0	99
	3				AGTCGTGGGGAACGGCATTATGTGCTTGCACATTCTGGACGTCGACCGGCGCACGGGTGAGTATCGCGTATCCAACCTGCCCCTTACTTGGGGATACCCCGTTGAAAGACGGCCTAATACCCGATGTGTTTCATTGACGGCATCCGATATGAAACAAAGGTTTTCCGGTAAGGGATGGGGATGCGTCTGATTAGCTAGTTGGGGGGGCAACGGCCCACCAAGGGGACGATCAGTAGGGGTTCTGAAAGGAAGGTCCCCCACATTGGAACTGAAACACGGTCCAAACTCCTACGGGAGGCAGCAGTGAGGAATATTGGTCAATGGACGCAAGTCTGAACCAGCCAAGTAGCGTGCAGGATGACGGCCCTATGGGTTGTAAACTGCTTTTATGTGGGAATA…	Prevotella nigrescens	0	99
63	1				AGTCGTGGGGAACGGCATTATGTGCTTGCACATTCTGGACGTCGACCGGCGCACGGGTGAGTATCGCGTATCCAACCTGCCCCTTACTTGGGGATACCCCGTTGAAAGACGGCCTAATACCCGATGTGTTTCATTGACGGCATCCGATATGAAACAAAGGTTTTTCCGGTAAGGGATGGGGATGCGTCTGATTAGCTTGTTGGCGGGGCAACGGCCCACCAAGGCAACGATCAGTAGGGGTTCTGAGAGGAAGGTCCCCCACATTGGAACTGAGACACGGTCCAAACTCCTACGGGAGGCAGCAGTGAGGAATATTGGTCAATGGACGCAAGTCTGAACCAGCCAAGTAGCGTGCAGGATGACGGCCCTATGGGTTGTAAACTGCTTTTATGTGGGAAT…	Prevotella nigrescens	0	99
	2				GTCGAGGGGAAACGGCATTAAGTGCTTGCACTTTTTGGACGTCGACCGGCGCACGGGTGAGTAACGCGTATCCAACCTTCCCATGACTAAGGGATAACCTGCCGAAAGGCAGACTAATACCTTATGGTCTTCACTGACGGCATCAGATGTGAAGTAAAGATTTATCGGTTATGGATGGGGATGCGTCTGATTAGCTTGTTGGCGGGGTAACGGCCCACCAAGGCAACGATCAGTAGGGGTTCTGAGAGGAAGGTCCCCCACATTGGAACTGAGACACGGTCCAAACTCCTACGGGAGGCAGCAGTGAGGAATATTGGTCAATGGGCGAGAGCCTGAACCAGCCAAGTAGCGTGCAGGATGACGGCCCTATGGGTTGTAAACTGCTTTTGTATGGGGATA…	Prevotella histicola	0	99
	3				GTCGTGGGGAACGGCATTATGTGCTTGCACATTCTGGACGTCGACCGGCGCACGGGTGAGTATCGCGTATCCAACCTGCCCCTTACTTGGGGATACCCCGTTGAAAGACGGCCTAATACCCGATGTGTTTCATTGACGGCATCCGATATGAAACAAAGGTTTTTCCGGTAAGGGATGGGGATGCGTCTGATTAGCTTGTTGGCGGGGCAACGGCCCACCAAGGCAACGATCAGTAGGGGTTCTGAGAGGAAGGTCCCCCACATTGGAACTGAGACACGGTCCAAACTCCTACGGGAGGCAGCAGTGAGGAATATTGGTCAATGGACGCAAGTCTGAACCAGCCAAGTAGCGTGCAGGATGACGGCCCTATGGGTTGTAAACTGCTTTTATGTGGGAATA…	Prevotella nigrescens	0	99
64	No black-pigmented colony
65	1				ACGGCATTATGTGCTTGCACATTTTGGACGTCGACCGGCGCACGGGTGAGTATCGCGTATCCAACCTTCCCTCCACTCGGGGATACCCCGTTGAAAGACGGCCTAATACCCGATGTTGTCCACATATGGCATCTGACGTGGACCAAAGATTCATCGGTGGAGGATGGGGATGCGTCTGATTAGCTTGTTGGTGCGGGTAACGGCCCACCAAGGCAACGATCAGTAGGGGTTCTGAGAGGAAGGTCCCCCACATTGGAACTGAGACACGGTCCAAACTCCTACGGGAGGCAGCAGTGAGGAATATTGGTCAATGGACGGAAGTCTGAACCAGCCAAGTAGCGTGCAGGATTGACGGCCCTATGGGTTGTAAACTGCTTTTGTTGGGGAGTAAAGTGAGGC…	Prevotella intermedia	0	99
	2				GCATTTATGTGCTTGCACATTTTGGACGTCGACCGGCGCACGGGTGAGTATCGCGTATCCAACCTTCCCTCCACTCGGGGATACCCCGTTGAAAGACGGCCTAATACCCGATGTTGTCCACATATGGCATCTGACGTGGACCAAAGATTCATCGGTGGAGGATGGGGATGCGTCTGATTAGCTTGTTGGTGCGGGTAACGGCCCACCAAGGCAACGATCAGTAGGGGTTCTGAGAGGAAGGTCCCCCACATTGGAACTGAGACACGGTCCAAACTCCTACGGGAGGCAGCAGTGAGGAATATTGGTCAATGGACGGAAGTCTGAACCAGCCAAGTAGCGTGCAGGATTGACGGCCCTATGGGTTGTAAACTGCTTTTGTTGGGGAGTAAAGTGAGGCAC…	Prevotella intermedia	0	99
	3				GTGCTTTGCACATTTTTTGGACGTCGACCGGCGCACGGGTGAGTATCGCGTATCCAACCTTTCCCTCCACTCGGGGATACCCCGTTGAAAGACGGCCTAATACCCGATGTTGTCCACATATGGCATCTGACGTGGACCAAAGATTCATCGGTGGAGGATGGGGATGCGTCTGATTAGCTTGTTGGTGCGGGTAACGGCCCACCAAGGCAACGATCAGTAGGGGTTCTGAGAGGAAGGTCCCCCACATTGGAACTGAGACACGGTCCAAACTCCTACGGGAGGCAGCAGTGAGGAATATTGGTCAATGGACGGAAGTCTGAACCAGCCAAGTAGCGTGCAGGATTGACGGCCCTATGGGTTGTAAACTGCTTTTGTTGGGGAGTAAAGTGAGGCACGCGT…	Prevotella intermedia	0	99
66	2				AGGCTTAACATTTCTGTGTACCGTAGGCAGTCGTGGGGCAGCGGAAATTAGCTTGGTAAGTCCGCCGAACGACCGGCGCACGGGTGAGTAACGCGTACCGAACCTGCCCATCACACAGGGATAGGCTTGCGAAAGCAAGATTAATACCTGATGGTCTCAGTTGTATGCATGTATGATTGAATAAAGCCTTCGGGCGGTGAGGGATGGCGGTGCGTCCCATTAGGAAGTTGGCGGGGTAACGGCCCACCAATCCTTCGATGGGTAGGGGTTCTGAGACGAAGGTCCCGCCTATTGGGAGA	Alloprevotella tannerae	3e-114	96
	3				TGGATGTGGAGCTCGTACTCGCAGTCGTGGGGCAGCGGATACTTAGCTTGCTAAGTATGCCGGCGACCGGCGCACGGGTGAGTAACGCGTACCGAACCTGCCCATCACACAGGGATAGGCTTGCGAAAGCAAGATTAATACCTGGATGGTCTCAGTTGTATGCATGTATAATTGAGTAAAGCCTTCGGGCGGTGATGGATGGCGGTGCGTCCCATTAGGAAGTTGGCGGGGTAACGGCCCACCATCCCTTTCGAGGGGGAA	Alloprevotella tannerae	7e-110	98
67	2				TATCGCTCATGCTTCCCGTAGCAGTCGAGGGGAAACGGCATTGAGTGCTTGCACTCTTTGGACGTCGACCGGCGCACGGGTGAGTAACGCGTATCCAACCTTCCCGTTACTGCGGGATAACCTGCCGAAAGGCAGACTAATACCGCATGTTCTTCGATGACGGCATCAGATTCGAAGCAAAGATTCTTCGGTAACGGAGGGGGATGCGTCTGATTAGCTAGTTGGCGGGGCGACGGCCCACCAAGGCGACGATCAGTAGGGGTTCTGAGAGGAAGGTCCCCCACATTGGAACTGAGACACGGTCCAAACTCCTACGGGAGGCAGCAGTGAGGAATATTGGTCAATGGGCGGAAGCCTGAACCAGCCAAGTAGCGTGCAGGATGACGGCCCTACGGGTTG…	Prevotella denticola	0	97
68	2				GTCGTGGGGAACGGCATTATGTGCTTGCACATTCTGGACGTCGACCGGCGCACGGGTGAGTATCGCGTATCCAACCTGCCCCTTACTTGGGGATACCCCGTTGAAAGACGGCCTAATACCCGATGTGTTTCATTGACGGCATCCGATATGAAACAAAGGTTTTCCGGTAAGGGATGGGGATGCGTCTGATTAGCTTGTTGGCGGGGCAACGGCCCACCAAGGCGACGATCAGTAGGGGTTCTGAGAGGAAGGTCCCCCACATTGGAACTGAGACACGGTCCAAACTCCTACGGGAGGCAGCAGTGAGGAATATTGGTCAATGGACGCAAGTCTGAACCAGCCAAGTAGCGTGCAGGATGACGGCCCTATGGGTTGTAAACTGCTTTTATGTGGGAATAA…	Prevotella nigrescens	0	99
69	1				GTCGAGGGGAACGGCATTATGTGCTTGCACATTCTGGACGTCGACCGGCGCACGGGTGAGTATCGCGTATCCAACCTTCCCTCCACTCGGGGATACCCCGTTGAAAGACGGCCTAATACCCGATGTTGTCCACATATGGCATCTGACGTGGACCAAAGATTCATCGGTGGAGGATGGGGATGCGTCTGATTAGCTTGTTGGTGCGGGTAACGGCCCACCAAGGCGACGATCAGTAGGGGTTCTGAGAGGAAGGTCCCCCACATTGGAACTGAGACACGGTCCAAACTCCTACGGGAGGCAGCAGTGAGGAATATTGGTCAATGGACGTAAGTCTGAACCAGCCAAGTAGCGTGCAGGATTGACGGCCCTATGGGTTGTAAACTGCTTTTGTTGGGGAGT…	Prevotella intermedia	0	99
	2				AGGGGAAACGGCATTATGTGCTTGCACATTCTGGACGTCGACCGGCGCACGGGTGAGTATCGCGTATCCAACCTTCCCTCCACTCGGGGATACCCCGTTGAAAGACGGCCTAATACCCGATGTTGTCCACATATGGCATCTGACGTGGACCAAAGATTCATCGGTGGAGGATGGGGATGCGTCTGATTAGCTTGTTGGTGCGGGTAACGGCCCACCAAGGCGACGATCAGTAGGGGTTCTGAGAGGAAGGTCCCCCACATTGGAACTGAGACACGGTCCAAACTCCTACGGGAGGCAGCAGTGAGGAATATTGGTCAATGGACGTAAGTCTGAACCAGCCAAGTAGCGTGCAGGATTGACGGCCCTATGGGTTGTAAACTGCTTTTGTTGGGGAGTAAA…	Prevotella intermedia	0	99
	3				AGGGGAAACGGCATTATGTGCTTGCACATTCTGGACGTCGACCGGCGCACGGGTGAGTATCGCGTATCCAACCTTCCCTCCACTCGGGGATACCCCGTTGAAAGACGGCCTAATACCCGATGTTGTCCACATATGGCATCTGACGTGGACCAAAGATTCATCGGTGGAGGATGGGGATGCGTCTGATTAGCTTGTTGGTGCGGGTAACGGCCCACCAAGGCGACGATCAGTAGGGGTTCTGAGAGGAAGGTCCCCCACATTGGAACTGAGACACGGTCCAAACTCCTACGGGAGGCAGCAGTGAGGAATATTGGTCAATGGACGTAAGTCTGAACCAGCCAAGTAGCGTGCAGGATTGACGGCCCTATGGGTTGTAAACTGCTTTTGTTGGGGAGTAAA…	Prevotella intermedia	0	99
70	1				TGGGGAACGGCATTTATGTGCTTGCACATTCTGGACGTCGACCGGCGCACGGGTGAGTATCGCGTATCCAACCTGCCCCTTACTTGGGGATACCCCGTTGAAAGACGGCCTAATACCCGATGTGTTTCATTGACGGCATCCGATATGAAACAAAGGTTTTCCGGTAAGGGATGGGGATGCGTCTGATTAGCTAGTTGGCGGGGCAACGGCCCACCAAGGCGACGATCAGTAGGGGTTCTGAGAGGAAGGTCCCCCACATTGGAACTGAGACACGGTCCAAACTCCTACGGGAGGCAGCAGTGAGGAATATTGGTCAATGGACGCAAGTCTGAACCAGCCAAGTAGCGTGCAGGATGACGGCCCTATGGGTTGTAAACTGCTTTTATGTGGGAATAAATT…	Prevotella nigrescens	0	99
	2				GTCGTGGGGAACGGCATTATGTGCTTGCACATTCTGGACGTCGACCGGCGCACGGGTGAGTATCGCGTATCCAACCTGCCCCTTACTTGGGGATACCCCGTTGAAAGACGGCCTAATACCCGATGTGTTTCATTGACGGCATCCGATATGAAACAAAGGTTTTCCGGTAAGGGATGGGGATGCGTCTGATTAGCTAGTTGGCGGGGCAACGGCCCACCAAGGCGACGATCAGTAGGGGTTCTGAGAGGAAGGTCCCCCACATTGGAACTGAGACACGGTCCAAACTCCTACGGGAGGCAGCAGTGAGGAATATTGGTCAATGGACGCAAGTCTGAACCAGCCAAGTAGCGTGCAGGATGACGGCCCTATGGGTTGTAAACTGCTTTTATGTGGGAATAA…	Prevotella nigrescens	0	99
	3				AGTCGTGGGGAACGGCATTATGTGCTTGCACATTCTGGACGTCGACCGGCGCACGGGTGAGTATCGCGTATCCAACCTGCCCCTTACTTGGGGATACCCCGTTGAAAGACGGCCTAATACCCGATGTGTTTCATTGACGGCATCCGATATGAAACAAAGGTTTTCCGGTAAGGGATGGGGATGCGTCTGATTAGCTAGTTGGCGGGGCAACGGCCCACCAAGGCGACGATCAGTAGGGGTTCTGAGAGGAAGGTCCCCCACATTGGAACTGAGACACGGTCCAAACTCCTACGGGAGGCAGCAGTGAGGAATATTGGTCAATGGACGCAAGTCTGAACCAGCCAAGTAGCGTGCAGGATGACGGCCCTATGGGTTGTAAACTGCTTTTATGTGGGAATA…	Prevotella nigrescens	0	99
71	1				GTCGAGGGGAACGGCATTATGTGCTTGCACATTCTGGACGTCGACCGGCGCACGGGTGAGTATCGCGTATCCAACCTTCCCTCCACTCGGGGATACCCCGTTGAAAGACGGCCTAATACCCGATGTTGTCCACATATGGCATCTGACGTGGACCAAAGATTCATCGGTGGAGGATGGGGATGCGTCTGATTAGCTTGTTGGTGCGGGTAACGGCCCACCAAGGCAACGATCAGTAGGGGTTCTGAGAGGAAGGTCCCCCACATTGGAACTGAGACACGGTCCAAACTCCTACGGGAGGCAGCAGTGAGGAATATTGGTCAATGGACGTAAGTCTGAACCAGCCAAGTAGCGTGCAGGATTGACGGCCCTATGGGTTGTAAACTGCTTTTGTTGGGGAGT…	Prevotella intermedia	0	99
	2				GTCGAGGGGAACGGCATTATGTGCTTGCACATTCTGGACGTCGACCGGCGCACGGGTGAGTATCGCGTATCCAACCTTCCCTCCACTCGGGGATACCCCGTTGAAAGACGGCCTAATACCCGATGTTGTCCACATATGGCATCTGACGTGGACCAAAGATTCATCGGTGGAGGATGGGGATGCGTCTGATTAGCTTGTTGGTGCGGGTAACGGCCCACCAAGGCAACGATCAGTAGGGGTTCTGAGAGGAAGGTCCCCCACATTGGAACTGAGACACGGTCCAAACTCCTACGGGAGGCAGCAGTGAGGAATATTGGTCAATGGACGTAAGTCTGAACCAGCCAAGTAGCGTGCAGGATTGACGGCCCTATGGGTTGTAAACTGCTTTTGTTGGGGAGT…	Prevotella intermedia	0	99
	3				GTCGAGGGGAACGGCATTATGTGCTTGCACATTCTGGACGTCGACCGGCGCACGGGTGAGTATCGCGTATCCAACCTTCCCTCCACTCGGGGATACCCCGTTGAAAGACGGCCTAATACCCGATGTTGTCCACATATGGCATCTGACGTGGACCAAAGATTCATCGGTGGAGGATGGGGATGCGTCTGATTAGCTTGTTGGTGCGGGTAACGGCCCACCAAGGCAACGATCAGTAGGGGTTCTGAGAGGAAGGTCCCCCACATTGGAACTGAGACACGGTCCAAACTCCTACGGGAGGCAGCAGTGAGGAATATTGGTCAATGGACGTAAGTCTGAACCAGCCAAGTAGCGTGCAGGATTGACGGCCCTATGGGTTGTAAACTGCTTTTGTTGGGGAGT…	Prevotella intermedia	0	99
72	1				GTCGAGGGGAACGGCATTATGTGCTTGCACATTCTGGACGTCGACCGGCGCACGGGTGAGTATCGCGTATCCAACCTTCCCTCCACTCGGGGATACCCCGTTGAAAGACGGCCTAATACCCGATGTTGTCCACATATGGCATCTGACGTGGACCAAAGATTCATCGGTGGAGGATGGGGATGCGTCTGATTAGCTTGTTGGTGCGGGTAACGGCCCACCAAGGCGACGATCAGTAGGGGTTCTGAGAGGAAGGTCCCCCACATTGGAACTGAGACACGGTCCAAACTCCTACGGGAGGCAGCAGTGAGGAATATTGGTCAATGGACGTAAGTCTGAACCAGCCAAGTAGCGTGCAGGATTGACGGCCCTATGGGTTGTAAACTGCTTTTGTTGGGGAGT…	Prevotella intermedia	0	99
	2				GTCGAGGGGAACGGCATTATGTGCTTGCACATTCTGGACGTCGACCGGCGCACGGGTGAGTATCGCGTATCCAACCTTCCCTCCACTCGGGGATACCCCGTTGAAAGACGGCCTAATACCCGATGTTGTCCACATATGGCATCTGACGTGGACCAAAGATTCATCGGTGGAGGATGGGGATGCGTCTGATTAGCTTGTTGGTGCGGGTAACGGCCCACCAAGGCGACGATCAGTAGGGGTTCTGAGAGGAAGGTCCCCCACATTGGAACTGAGACACGGTCCAAACTCCTACGGGAGGCAGCAGTGAGGAATATTGGTCAATGGACGTAAGTCTGAACCAGCCAAGTAGCGTGCAGGATTGACGGCCCTATGGGTTGTAAACTGCTTTTGTTGGGGAGT…	Prevotella intermedia	0	99
	3				GTCGAGGGGAACGGCATTATGTGCTTGCACATTCTGGACGTCGACCGGCGCACGGGTGAGTATCGCGTATCCAACCTTCCCTCCACTCGGGGATACCCCGTTGAAAGACGGCCTAATACCCGATGTTGTCCACATATGGCATCTGACGTGGACCAAAGATTCATCGGTGGAGGATGGGGATGCGTCTGATTAGCTTGTTGGTGCGGGTAACGGCCCACCAAGGCGACGATCAGTAGGGGTTCTGAGAGGAAGGTCCCCCACATTGGAACTGAGACACGGTCCAAACTCCTACGGGAGGCAGCAGTGAGGAATATTGGTCAATGGACGTAAGTCTGAACCAGCCAAGTAGCGTGCAGGATTGACGGCCCTATGGGTTGTAAACTGCTTTTGTTGGGGAGT…	Prevotella intermedia	0	99
73	1				AGTCGAGGGGAACGGCATTGAGTGCTTGCACTGAATGGACGTCGACCGGCGCACGGGTGAGTAACGCGTATCCAACCTTCCCGTTACTGCGGGATAACCTGCCGAAAGGCAGACTAATACCGCATGTTCTTCGATGACGGCATCAGATTCGAAGCAAAGATTTATCGGTAATGGAGGGGGATGCGTCTGATTAGCTGGTTGGCGGGGCGACGGCCCACCAAGGCGACGATCAGTAGGGGTTCTGAGAGGAAGGTCCCCCACATTGGAACTGAGACACGGTCCAAACTCCTACGGGAGGCAGCAGTGAGGAATATTGGTCAATGGGCGGAAGCCTGAACCAGCCAAGTAGCGTGCAGGAGGACGGCCCTACGGGTTGTAAACTGCTTTTATGCGGGGATA…	Prevotella denticola	0	99
	2				GTCGTGGGGAACGGCATTATGTGCTTGCACATTCTGGACGTCGACCGGCGCACGGGTGAGTATCGCGTATCCAACCTGCCCCTTACTTGGGGATACCCCGTTGAAAGACGGCCTAATACCCGATGTGTTTCATTGACGGCATCCGATATGAAACAAAGGTTTTCCGGTAAGGGATGGGGATGCGTCTGATTAGCTTGTTGGCGGGGCAACGGCCCACCAAGGCGACGATCAGTAGGGGTTCTGAGAGGAAGGTCCCCCACATTGGAACTGAGACACGGTCCAAACTCCTACGGGAGGCAGCAGTGAGGAATATTGGTCAATGGACGCAAGTCTGAACCAGCCAAGTAGCGTGCAGGATGACGGCCCTATGGGTTGTAAACTGCTTTTATGTGGGAATAA…	Prevotella nigrescens	0	99
	3				AGTCGAGGGGAACGGCATTGAGTGCTTGCACTGAATGGACGTCGACCGGCGCACGGGTGAGTAACGCGTATCCAACCTTCCCGTTACTGCGGGATAACCTGCCGAAAGGCAGACTAATACCGCATGTTCTTCGATGACGGCATCAGATTCGAAGCAAAGATTTATCGGTAATGGAGGGGGATGCGTCTGATTAGCTGGTTGGCGGGGCGACGGCCCACCAAGGCGACGATCAGTAGGGGTTCTGAGAGGAAGGTCCCCCACATTGGAACTGAGACACGGTCCAAACTCCTACGGGAGGCAGCAGTGAGGAATATTGGTCAATGGGCGGAAGCCTGAACCAGCCAAGTAGCGTGCAGGAGGACGGCCCTACGGGTTGTAAACTGCTTTTATGCGGGGATA…	Prevotella denticola	0	99

## Sheet: Data 2
Data 2 All data including patient information (gender, age), fimbrial type, and clinical parameters.
	Gender; 0, female; 1, male
	*fimA genotype was determined by DNA sequencing and BLAST
	*mfa1 genotype was determined by PCR with genotype-specific primers; 0, negative; 1, faint positive; 2, strong positive
																							Age														BOP%
Patient						Collect	Direct PCR					Genotype	Comment			PPD			PISA	PESA	Type		Untyped	I	Ib	I	Ib	II		III		IV		V			Untyped	I	Ib	I	Ib	II		III		IV		V
#	Examination Date	ID	Gender	Age		in RTF	fimA	seq-F	type	53	75					mean	Max	BOP%					Type	53	53	70	70	53	70	53	70	53	70	53	70		Type	53	53	70	70	53	70	53	70	53	70	53	70
																							0	1	3	2	4	5	6	7	8	9	10	11	12		0	1	3	2	4	5	6	7	8	9	10	11	12
1						20160927	1	CTGAACGAACTGCGACGCTATATGCAAGACAATCTCTAAATGAAAAAAGATTCTTAGAAAACAATATTCACTTTTAAAACAAAAACGAGATGAAAAAAACAAAGTTTTTCTTGTTGGGACTTGCTGCTCTTGCTATGACAGCTTGTAACAAAGACAACGAGGCACAACCCATTGTGGAAACTGACGCTACTGTTAGTTTCATAATTAAGGCTGGCTCGCCACAACGTGAAACAGAACCCAACAGTCTCCTTGACAGTGATGCCAAAATCACCAAATTGACAGCTATGGTCTATGCAGGTCAAGTTCAAGAAGGAATTAAGACTGTAGAAGATGCTGACAACGTACTCAAAGTTGAAGGTATCAAATGTAAATCAGGAGCAAACAAAGTATTGGTTGTTG…	5	0	0										12
2			0	36		20160927	2	GCCCGGAGCACAACACAATCTGAACGAACTGCGACGCTATATGCAAGACAATCTCTAAATGGAAAAAGATTCTTAGAAAACAATATTCACTTTTAAAACAAAAACGAGATGAAAAAAACAAAGTTTTTCTTGTTGGGACTTGCTGCTCTTGCTATGACAGCTTGTAACAAAGACAACGAGGCAGAACCCGTTACAGAAGGTAATGCCACCATCAGCGTGGTATTGAAGACCAGCAATCCGAATCGTGCTTTTGGAGTTGGCGATGACGAATCAAAGGTGGCTAAGTTGACCGTAATGGTTTATAATGGAGAACAGCAGGAAGCCATCAAATCAGCCGAAAATGCGACTAAGGTTGAAGACATCAAATGTAGTGCAGGCCAACGTACGCTGGTCGTAATG…	1b	2	0	3				2.6	10	42	1409.5	471.7	2				36														42
3			0	63		20160927	0			0	0					2.2	10	7	1126	62.1	0		63														7
4			0	64		20160927	0			0	0					3.8	10	86	2324.6	1434.2	0		64														86
5			1	69		20160927	2	GTCCGGAGCACAACACAATCTGAACGAACTACGACGCTATATGCAAGACAATCTCTAAATGAAAAAAGATTCTTAGAAAACAATATTCACTTTTAAAACAAAAACGAGATGAAAAAAACAAAGTTTTTCTTGTTGGGACTTGCTGCCCTTGCTATGACAGCTTGTAACAAAGACAACGAGGCAGAACCCGTTACAGAAGGTAATGCCACCATCAGCGTGGTATTGAAGACCAGCAATCCGAATCGTGCTTTTGGAAATGCGGAAGACGAATCAAAGGTGGCTAAGTTGACCGTAATGGTTTATAATGGAGAACAGCAGGAAGCCATCGAATCAGTCGAAAATGCGACTAAGGTTGAAAACATCAAATGTAGTGCAGGCCAACGTACGCTGGTCGTAATG…	2	0	2	6				3.6	10	44	1781.3	1061.2	6								69														44
6			1	61		20160927	1		1b	2	0	6	1b from isolates			2.7	7	5	1436.3	35	2				61														5
7							1	CAATCTGAACGAACTGCGACGCTATATGCAAGACAATCTCTAAATGGAAAAAGATTCTTATAAAACATATTCAATTTTAAAACAACAACGAAATGAAAAAAACAAAGTTTTTCTTGTTGGTACTTGCTGGTCTTGCTCTGACAGGTTGCAACAAAAACATCTAGGGGGATTCCGTTCCGGAGGGCAATGTCCCCATCAGCGTGGTATTGAACACGATCTATCCGACTCTTGCTTTTGGATATGGAAAAGACGAATCAAAGGTGGCTAAGTTGACCGTCATGGTCTATCCTGGAGAACGACTGGAAGCCATCAAATCCGTCTGGAATGCGACTAAGGTTGAATACATCTAATGTAGTGCAGGCCAACTTGTCTGGCCGTAACGGCCAATACGGGTGCAAT…	1	0	1	2	1b in PCR								3
8			1	62			2	GCCCGGAGCACAACACAATCTGAACGAACTGCGACGCTATATGCAAGACAATCTCTAAATGAAAAAAGATTCTTAGAAAACAATATTCACTTTTAAAACAAAAACGAGATGAAAAAAACAAAGTTTTTCTTGTTGGGACTTGCTGCTCTTGCTATGACAGCTTGTAACAAAGACAACGAGGCAGAACCCGTTACAGAAGGTAATGCTACCATCAGCGTGGTATTGAAGACCAGCAATCCGAATCGTGCTTTTGGAGAAGACGAATCAAAGGTGGCTAAGTTGACCGTAATGGTTTATAATGGAGAACAGCAGGAAGCCATCAAATCAGCCGAAAATGCGACTAAGGTTGAAGACATCAAATGTAGTGCAGGCCAACGTACGCTGGTCGTAATGGCCAAT…	2	2	0	5				3	11	22	1404.4	352.2	5							62														22
9			0	70			0			0	0					2.5	7	54	1207	403.2	0		70														54
10			0	49			0			0	0					2	6	0	904.7	0	0		49														0
11			0	63			1	GCCACCATCAGCGTGGTATTGAAGACCAGCAATTCGAATCGTGCTTTTGGAGTTGACGATGACGAATCAGAGGTGGCTAACTTGACCGTTTTGGTTTATAATGGAGAACAGCCCGAAGCCATCAAATCAGCCGAAAATGCGGCTAAGGTTGAAGACATCAAAGGTAGTGCAGGCCAACTTACCCTGGTCGTAATGGCCAATACGGGTGCAATGGAACTGGTTGGCAAGACTCATGCAAAGGTAAAAGCATTGACAACTGAAGTGACTGCAGAAAACCATGAGGGTACGAGTTTGATCATGAAACCAGATCCTGTTGACCTAGCACTTGTCGCCGGCTATAACTATTATGGTTATGATGGATCTCAGGAAGGTAATCAGATTTCGCAAGATACTCCTCTT…	2	0	1	6				2.3	6	10	897.4	113.3	6								63														10
12							2	CACAATCTGAACGAACTACGACGCTATATGCAAGACAATCTCTAAATGGGAAAAGATTAGATTCTTAGAAAACAATATTCACTTTTAAAACAAAAACGAGATGAAAAAAACAAAGTTTTTCTTGTTGGGACTTGCTGCTCTTGCTATGACAGCTTGTAACAAAGACAACGAGGCAGAACCCGTTACAGAAGGTAATGCTACCATCAGCGTGGTATTGAAGACCAGCAATCCGAATCGTGCTTTTGGAGTTGGCGATGACGAATCAAAGGTGGCTAAGTTGACCGTAATGGTTTATAATGGAGAACAGCAGGAAGCCATCAAATCAGCCGAAAATGCGACTAAGGTTGAAGACATCAAATGTAGTGCAGGCCAACGTACGCTGGTCGTAATGGCCAATAC…	1b	2	0	3									2
13			0	72			1	CAGCCCGGAGCACAACACAATTCTGAACGAACTGCGACGCTATATGCAAGACAATCTCTAAATGGAAAAAGATTCTTAGAAAACAATATTCACTTTTAAAACAAAAACGAGATGAAAAAAACAAAGTTTTTCTTGTTGGGACTTGCTGCTCTTGCTATGACAGCTTGTAACAAAGACAACGAGGCAGAACCCGTTACAGAAGGTAATGCCACCATCAGCGTGGTATTGAAGACCAGCAATCCGAATCGTGCTTTTGGAGTTGGCGATGACGAATCAAAGGTGGCTAAGTTGACCGTAATGGTTTATAATGGAGAACAGCAGGAAGCCATCAAATCAGCCGAAAATGCGACTAAGGTTGAAGACATCAAATGTAGTGCAGGCCAACGTACGCTGGTCGTA…	1	0	0		1b in PCR			3.7	6	59	1079.2	831.1	0		72														59
14			0	64			2	GCCCGGAGCACAACACAATCTGAACGAACTACGACGCTATATGCAAGACAATCTCTAAATGGGAAAAGATTAGATTCTTAGAAAACAATATTCACTTTTAAAACAAAAATGAGATGAAAAAAACAAAGTTTTTCTTGTTAGGACTTGCTGCTCTTGCTATGACAGCTTGTAACAAAGACAACGAGGCAGAACCCGTTACAGAAGGTAATGCTACCATCAGCGTGGTATTGAAGACCAGCAATCCGAATCGTGCTTTTGGAAATGCGGGAGACGAAGCAAAAGTGGCTAAACTGACCGTAATGGTTTATAATGGAGAACAGCAGGAAGCCATCAAATCAGCCGAAAATGCGACTAAGGTTGAAGACATCAAATGTAGTGCAGGCCAACGTACGCTGGTCG…	2	0	2	6				3.3	7	6	409	156.8	6								64														6
15							2	CCGGAGCACAACACAATCTGAACGAACTGCGACGCTTATGCAAGACAATCTCTAAATGAAAAAAGATTCTTAGAAAACAATATTCACTTTTAAAACAAAAACGAGATGAAAAAAACAAAGTTTTTCTTGTTGGGACTTGCTGCCCTTGCTATGACAGCTTGTAACAAAGACAACGAGGCAGAACCCGTTACAGAAGGTAATGCCACCATCAGCGTGGTATTGAAGACCAGCAATCCGAATCGTGCTTTTGGAAATGCGGGAGACGAATCAAAGGTGGCTAAGTTGACCGTAATGGTTTATAATGGAGAACAGCAGGAAGCCATCGAATCAGTCGAAAATGCGACTAAGGTTGAAAACATCAAATGTAGTGCAGGCCAACGTACGCTGGTCGTAATGGCC…	1	2	0	3	1b in PCR								1
16			0	51			2	CACAACACAATCTGAACGAACTACGACGCTATATGCAAGACAATCTCTAAATGGGAAAAGATTAGATTCTTAGAAAACAATATTCACTTTTAAAACAAAAACGAGATGAAAAAAACAAAGTTTTTCTTCGTTGGGACTTGCTGCTCTTGCTATGACAGCTTGTAACAAAGACAACGAGGCAGAACCCGTTACAGAAGGTAATGCTACCATCAGCGTGGTTTTGAAGACCAGCAATCCGAATCGTGCTTTTGGAGAAGACGAATCAAAGGTGGCTAAGTTGACCGTAATGGTTTATAATGGAGAACAGCAGGAAGCCATCAAATCAGCCGAAAATGCGACTAAGGTTGAAGACATCAAATGTAGTGCAGGCCAACGTACGCTGGTCGTAATGGCCAATAC…	2	0	2	6				3.5	11	27	1546.3	532.7	6								51														27
17			0	57			1	GCCACCATCAGCGATGGTATTGAAGACCAGCAATCCGAATCGTGCTTTTGGAGTTGGCGATGACGAATCAAAGGTGGCTAAGTTGACCGTAATGGTTTATAATGGAGAACAGCAGGAAGCCATCAAATCAGCCGAAAATGCGACTAAGGTTGAAGACATCAAATGTAGTGCAGGCCAACGTACGCTGGTCGTAATGGCCAATACGGGTGCAATGGAACTGGTTGGCAAGACTCTTGCAGAGGTAAAAGCATTGACAACTGAACTGACTGCAGAAAATCAAGAGGCTGCAGGTTTGATCATGACAGCAGAGCCAAAAACAATCGTTTTGAAGGCAGGCAAGAACTACATTGGATACAGTGGAAACGGAGAGGGTAATCACATTGAGAATGATCCTCTTAA…	1b	0	0					3.4	10	45	2280.7	1031.8	0		57														45
18			1	59			2	GGCCCGGAGCACAACACAATCTGAACGAACTACGACGCTATATGCAAGACAATCTCTAAATGGGAAAAGATTAGATTCTTAGAAAACAATATTCACTTTTAAAACAAAAACGAGATGAAAAAAACAAAGTTTTTCTTGTTGGGACTTGCTGCTCTTGCTATGACAGCTTGTAACAAAGACAACGAGGCAGAACCCGTTACAGAAGGTAATGCTACCATCAGCGTGGTTTTGAAGACCAGCAATCCGAATCGTGCTTTTGGAGAAGACGAATCAAAGGTGGCTAAGTTGACCGTAATGGTTTATAATGGAGAACAGCAGGAAGCCATCAAATCAGCCGAAAATGCGACTAAGGTTGAAGACATCAAATGTAGTGCAGGCCAACGTACGCTGGTCGTAATG…	2	0	2	6	53K-R8/75K-R2			5	11	142	2850	2623.4	6								59														142
19							2	GTCCGGAGCACAACACAATCTGAACGAACTACGACGCTATATGCAAGACAATCTCTAAATGAAAAAAGATTCTTAGAAAACAATATTCACTTTTAAAACAAAAACGAGATGAAAAAAACAAAGTTTTTCTTGTTGGGACTTGCTGCCCTTGCTATGACAGCTTGTAACAAAGACAACGAGGCAGAACCCGTTACAGAAGGTAATGCCACCATCAGCGTGGTATTGAAGACCAGCAATCCGAATCGTGCTTTTGGAAATGCGGAAGACGAATCAAAGGTGGCTAAGTTGACCGTAATGGTTTATAATGGAGAACAGCAGGAAGCCATCGAATCAGTCGAAAATGCGACTAAGGTTGAAAACATCAAATGTAGTGCAGGCCAACGTACGCTGGTCGTAATG…	2	2	0	5									5
20			0	51			2	GCCCGGAGCACAACACAATCTGAACGAACTACGACGCTATATGCAAGACAATCTCTAAATGGGAAAAGATTAGATTCTTAGAAAACAATATTCACTTTTAAAACAAAAACGAGATGAAAAAAACAAAGTTTTTCTTGTTGGGACTTGCTGCTCTTGCTATGACAGCTTGTAACAAAGACAACGAGGCAGAACCCGTTACAGAAGGTAATGCCACCATCAGCGTGGTATTGAAGACCAGCAATCCGAATCGTGCTTTTGGAAATGCGGGAGACGAAGCAAAAGTGGCTAAACTGACCGTAATGGTTTATAATGGAGAACAGCAGGAAGCCATCAAATCAGCCGAAAATGCGACTAAGGTTGAAGACATCAAATGTAGTGCAGGCCAACGTACGCTGGTCG…	2	2	0	5				2.2	3	12	1145.1	76.3	5							51														12
21			1	73			0			0	0					2.5	7	2	1268.5	21.6	0		73														2
22			0	43			1	ATGCCACCATCAGCGTGGTATTGAAGACCAGCAATCCGAATCGTGCTTTTGGAGTTGGCGATGACGAATCAGAGGTGGCTAACTTGACCGTAATGGTTTATAATGGAGAACAGCACGAAGCCATCAAATCAGCCGAAAATGCGACTAAGGATGAAGACATCAAATGTAGTGCAGGCCAACGTACGCTGGTCGTAATGGCCAATACGGGTGCAATGGAACTGGTTGGCAAGACTCTTGCAGAGGTAAAAGCATTGACAACTGAACTGACTGCAGAAAATCAAGAGGCTGCAAGTTTGATCATGACAGCAGAGCCAAAAACAATCGTTTTGAAGGCAGGCAAGAACTACATTGAATACAGTGGAAACGGAAAGGGTAATCACATTGAGAATGATCCTCTTA…	1b	0	0					2.4	5	13	1313.3	139.4	0		43														13
23			0	65			2	GCCAGCCCGGAGCACAACACAATCTGAACGAACTGCGACGCTATATGCAAGACAATCTCTAAATGGAAAAAGATTCTTAGAAAACAATATTCACTTTTAAAACAAAAACGAGATGAAAAAAACAAAGTTTTTCTTGTTGGGACTTGCTGCTCTTGCTATGACAGCTTGTAACAAAGACAACGAGGCAGAACCCGTTACAGAAGGTAATGCCACCATCAGCGTGGTATTGAAGACCAGCAATCCGAATCGTGCTTTTGGAAATGCGGAAGACGAATCAAAGGTGGCTAAGTTGACCGTAATGGTTTATAATGGAGAACAGCAGGAAGCCATCGAATCAGTCGAAAATGCGACTAAGGTTGAAAACATCAAATGTAGTGCAGGCCAACGTACGCTGGTCGT…	1	0	1	2	1b in PCR			4.1	10	77	2302.1	933.1	3					65														77
24			1	66			2	CAACACAATCTGAACGAACTGCGACGCTTATGCAAGACAATCTCTAAATGGGAAAAGATTAGATTCTTAGAAAACAATATTCACTTTTAAAACAAAAACGAGATGAAAAAAACAAAGTTTTTCTTCGTTGGGACTTGCTGCTCTTGCTATGACAGCTTGTAACAAAGACAACGAGGCAGAACCCGTTACAGAAGGTAATGCCACCATCAGCGTGGTATTGAAGACCAGCAATTCGAATCGTGCTTTTGGAGTTGGCGATGACGAATCAAAGGTGGCTAAGTTGACCGTAATGGTTTATAATGGAGAACAGCAGGAAGCCATCAAATCAGCCGAAAATGCGACTAAGGTTGAAGACATCAAATGTAGTGCAGGCCAACGTACGCTGGTCGTAATGGCCAA…	2	0	2	6				3.6	11	38	1912.6	904.8	6								66														38
25			1	42			2	GCCCGGAGCACAACACAATCTGAACGAACTGCGACGCTTTATGCAAGACAATCTCTAAATGGAAAAAGATTCTTAGAAAACAATATTCACTTTTAAAACAAAAACGAGATGAAAAAAACAAAGTTTTTCTTGTTGGGACTTGCTGCTCTTGCTATGACAGCTTGTAACAAAGACAACGAGGCAGAACCTGTTACAGAAGGTAATGCTACCATCAGCGTGGTATTGAAGACCAGCAATCCGAATCGTGCTTTTGGAGAAGACGAATCAAAGGTGGCTAAGTTGACCGTAATGGTTTATAATGGAGAACAGCAGGAAGCCATCAAATCAGCCGAAAATGCGACTAAGGTTGAAGACATCAAATGTAGTGCAGGCCAACGTACGCTGGTCGTAATGGCCAAT…	2	0	1	6				4	12	51	2629.1	1016.9	6								42														51
26			0	58			1	TCAGCGTGGTATTGAAGACCAGCAATCCGAATCGTGCTTTTGGAGTTGGCGATGACGAATCAAAGGTGGCTAAGTTGACCGTAATGGTTTATAATGGAGAACAGCAGGAAGCCATCAAATCAGCCGAAAATGCGACTAAGGTTGAAGACATCAAATGTAGTGCAGGCCAACGTACGCTGGTCGTAATGGCCAATACGGGTGCAATGGAACTGGTTGGCAAGACTCTTGCAGAGGTAAAAGCATTGACAACTGAACTGACTGCAGAAAATCAAGAGGCTGCAGGTTTGATCATGACAGCAGAGCCAAAAACAATCGTTTTGAAGGCAGGCAAGAACTACATTGGATACAGTGGAAACGGAGAGGGTAATCACATTGAGAATGATCCTCTTAAAATCAAGC…	1b	0	1	4				6	15	113	3000.2	2631	4						58														113
27			0	38			1	GCCACCATCAGCGTGGTATTGAAGACCAGCAATCCGAATCGTGCTTTTGGAGTTGGCGATGACGAATCGGAGGTGGCTAACTTGACCGTAATGGTTTATAATGGAGAACAGCACGAAGCCATCAAATCAGCCGAAAATGCGACTAAGGATGAAGACATCAAATGTAGTGCAGGCCAACGTACGCTGGTCGTAATGGCCAATACGGGTGCAATGGAACTGGTTGGCAAGACTCTTGCAGAGGTAAAAGCATTGACAACTGAACTGACTGCAGAAAATCAAGAGGCTGCGGGTTTGATCATGACAGCAGAGCCAAAAACAATCGTTTTGAAGGCAGGCAAGAACTACATTGGATACAGTGGAAACGGAGAGGGTAATCACATTGAGAATGATCCTCTTAAA…	1b	0	1	4				4.4	8	127	2618.1	1955.1	4						38														127
28			0	67			1	ATGCCACCATCAGCGTGGTATTGAAGACCAGCAATTCGAATCGTGCTTTTGGAGTTGGCGATGACGAATCAAAGGTGGCTAAGTTGACCGTAATGGTTTATAATGGAGAACAGCAGGAAGCCATCAAATCAGCCGAAAATGCGACTAAGGTTGAAGACATCAAATGTAGTGCAGGCCAACGTACGCTGGTCGTAATGGCCAATACGGGTGCAATGGAACTGGTTGGCAAGACTCTTGCAGAGGTAAAAGCATTGACAACTGAACTGACTGCAGAAAACCAAGAGGCTGCAGGGTTGATCATGACAGCAGAGCCAAAAACAATCGTTTTGAAGGCAGGCAAGAACTACATTGGATACAGTGGAACCGGAGAGGGTAATCACATTGAGAATGATCCTCTTA…	1b	0	1	4				3	12	40	1263	745.8	4						67														40
29			0	70			2	ACACAATCTGAACGAACTACGACGCTATATGCAAGACAATCTCTAAATGGGAAAAGATTAGATTCTTAGAAAACAATATTCACTTTTAAAACAAAAACGAGATGAAAAAAACAAAGTTTTTCTTGTTGGGACTTGCTGCTCTTGCTATGACAGCTTGTAACAAAGACAACGAGGCAGAACCCGTTACAGAAGGTAATGCTACCATCAGCGTGGTTTTGAAGACCAGCAATCCGAATCGTGCTTTTGGAGAAGACGAATCAAAGGTGGCTAAGTTGACCGTAATGGTTTATAATGGAGAACAGCAGGAAGCCATCAAATCAGCCGAAAATGCGACTAAGGTTGAAGACATCAAATGTAGTGCAGGCCAACGTACGCTGGTCGTAATGGCCAATACGGGTG…	2	1	0	5				3.6	8	138	2134.1	1923.3	5							70														138
30			1	31			0			0	0					5.7	12	161	3658.3	3546.9	0		31														161
31			0	56			0			0	0					2.5	6	70	1313	595.9	0		56														70
32			0	57			1	ATGCCACCATCAGCGTGGTATTGAAGACCAGCAATCCGAATCGTGCTTTTGGAGTTGGCGATGACGAATCAAAGGTGGCTAAGTTGACCGTAATGGTTTATAATGGAGAACAGCAGGAAGCCATCAAATCAGCCGAAAATGCGACTAAGGTTGAAGACATCAAATGTAGTGCAGGCCAACGTACGCTGGTCGTAATGGCCAATACGGGTGCAATGGAACTGGTTGGCAAGACTCTTGCAGAGGTAAAAGCATTGACAACTGAACTGACTGCAGAAAATCAAGAGGCTGCAGGTTTGATCATGACAGCAGAGCCAAAAACAATCGTTTTGAAGGCAGGCAAGAACTACATTGGATACAGTGGAAACGGAGAGGGTAATCACATTGAGAATGATCCTCTTA…	1b	0	2	4				4.6	10	10	2434.7	134.4	4						57														10
33			0	61			2	AACACAATCTGAACGAACTGCGACGCTATATGCAAGACAATCTCTAAATGGAAAAAGATTCTTAGAAAACAATATTCACTTTTAAAACAAAAACGAGATGAAAAAAACAAAGTTTTTCTTGTTGGGACTTGCTGCTCTTGCTATGACAGCTTGTAACAAAGACAACGAGGCAGAACCCGTTACAGAAGGTAATGCCACCATCAGCGTGGTATTGAAGACCAGCAATCCGAATCGTGCTTTTGGAGAAGACGAATCAAAGGTGGCTAAGTTGACCGTAATGGTTTATAATGGAGAACAGCAGGAAGCCATCGAATCAGTCGAAAATGCGACTAAGGTTGAAAACATCAAATGTAGTGCAGGCCAGCGTACGCTGGTCGTAATGGCCAATACGGGTGAAAT…	2	0	2	6	53K-R8/75K-R2			3.5	10	71	2191.6	1031.1	6								61														71
34			0	64			1			0	0					4.4	11	38	985.2	543.1	0		64														38
35			0	54			0			0	0					3.5	9	20	1900.9	584.9	0		54														20
36			1	62			0			0	0					2.9	7	27	1316.7	275.2	0		62														27
37			1	55			1	ATGCTACCATCAGCGTGGTATTGAAGACCAGCAATCCGAATCGTGCTTTTGGAAATGCAGGGAGACGAAGCAAAAGTGGCTAAACTGACCGTAATGGTTTATAATGGAGAACAGCAGGAAGCCATCAAATCAGCCGAAAATGCGACTAAGGTTGAAGACATCAAATGTAGTGCAGGCCAACGTACGCTGGTCGTAATGGCCAATACGGGTGAAATGAAATTGGCTGGCAAGACTCTTGCAGAGGTAAAAGCATTGACAACTGAACTGACTGAAGGAAACCAAGAGGCTGCAGGGTTGATCATGACAGCAGAGCCTGTTGAGGTAACACTTGTCGCCGGCAATAACTATTATGGTTATGATGGATCTCAGGGAGGTAATCAGATTTCGCAAGATACTCCT…	2	0	1	6				4.3	12	60	2252.6	1436.4	6								55														60
38			1	65			1			0	0					4.2	15	46	2309.2	1087.9	0		65														46
39			0	31			0			0	0					2.1	3	35	1114.6	237.7	0		31														35
40			0	58			2	CAGTCCGGAGCACAACACAATCTGAACGAACTACGACGCTATATGCAAGACAATCTCTAAATGAAAAAAGATTCTTAGAAAACAATATTCACTTTTAAAACAAAAACGAGATGAAAAAAACAAAGTTTTTCTTGTTGGGACTTGCTGCCCTTGCTATGACAGCTTGTAACAAAGACAACGAGGCAGAACCCGTTACAGAAGGTAATGCCACCATCAGCGTGGTATTGAAGACCAGCAATCCGAATCGTGCTTTTGGAAATGCGGAAGACGAATCAAAGGTGGCTAAGTTGACCGTAATGGTTTATAATGGAGAACAGCAGGAAGCCATCGAATCAGTCGAAAATGCGACTAAGGTTGAAAACATCAAATGTAGTGCAGGCCAACGTACGCTGGTCGTAA…	2	0	0		There was an intensive band at 1.2 kb.	ACAAAACGACTTCCTCAATCATGTTGAAAGGCTTATCGATTGGCGTCCGATCATGACGCTGATCAACAAGAAATACCCTAAGCGACAAAATGCCCTCGGCGCCCCGGCTTATGACGTGATTCTCTTATTCAAAATGTTGCTTTTGGAGACATGGTACAACCTCAATGATTGTGCTTTGGAGGAACGCATCAATGATTCGATCACCTTTTCCCGATTCCTGGGACTGAAGATGGAAGAGGTATCTCCCGACCACAGCACCATCAGTCGATTTCGTTCGGCACTGACGGAGTTGGGGCTCATGGACAAACTATTGGCGCAGTTTAACAAACAACTTTCCCGCCATCACATTTCGGTAAGGGAAGGGGTGCTTGTCGAT	ISPg1, transposase	2.7	10	14	1502.8	254.9	0		58														14
41			0	65			0			0	1					3.1	10	37	1350	495.7	0		65														37
42			1	55			2	CACAATCTGAACGAACTGCGACGCTTATGCAAGACAATCTCTAAATGGAAAAAGATTCTTAGAAAACAATATTCACTTTTAAAACAAAAACGAGATGAAAAAAACAAAGTTTTTCTTGTTGGGACTTGCTGCTCTTGCTATGACAGCTTGTAACAAAGACAACGAGGCAGAACCCGTTACAGAAGGTAATGCCACCATCAGCGTGGTATTGAAGACCAGCAATCCGAATCGTGCTTTTGGAGTTGGCGATGACGAATCAAAGGTGGCTAAGTTGACCGTAATGGTTTATAATGGAGAACAGCAGGAAGCCATCAAATCAGCCGAAAATGCGACTAAGGTTGAAGACATCAAATGTAGTGCAGGCCAACGTACGCTGGTCGTAATGGCCAATACGGGTGC…	1	2	0	1				3.8	10	61	2146.7	1114.9	1			55														61
43			0	18			1	AACTGCGGACGCTATATGCAAGACAATCTCTAAATGGAAAACGATTCTTAGAAAACAATATTCACTTTTAAAACAAAAACGAGATGAAAAAAACAAAGTTTTTCTTGTTGGGACTTGCTGCTCTTGCTATGACAGCTTGTAACAAAGACAACGAGGCAGAACCCATTGTGGAAACTGACGCTACTGTTAGTTTCATAATTAAGAGTGGAGAGGGGCGTGCTGTAGGCGATGGCCTTGCAGATGCCAAGATCACCAAACTCACCGCCATGGTCTATGCAGGTCAAATTCAAGAAGGGATTAAGACAGTGGAAGAGGCCGACGGAGTTCTTAAAGTAGAAGGAATTCCGTGTAAATCAGGAGCCAACCGTGTCCTCGTCGTTGTAGCCAATCACAATTATG…	4	1	0	9				1.8	5	27	917.9	192.8	9											18														27
44			0	62			2	GGCCGGAGCACAACACAATCTGAACGAACTGCAACGCTATATGCAAGACAATCTCTAAATGGGAAAAGATTAGATTCTTAGAAAACAATATTCACTTTTAAAACAAAAACGAGATGAAAAAAACAAAGTTTTTCTTGTTGGGACTTGCTGCTCTTGCTATGACAGCTTGTAACAAAGACAACGAGGCAGAACCCGTTACAGAAGGTAATGCCACCATCAGCGTGGTATTGAAGACCAGCAATCCGAATCGTGCTTTTGGAGAAGACGAATCAAAGGTGGCTAAGTTGACCGTAATGGTTTATAATGGAGAACAGCAGGAAGCCATCGAATCAGTCGAAAATGCGACTAAGGTTGAAAACATCAAATGTAGTGCAGGCCAGCGTACGCTGGTCGTAATGG…	2	0	2	6				3.3	9	45	1957.3	852.5	6								62														45
45			0	49			0			0	0					3.4	6	63	2085	850.3	0		49														63
46			1	43			2	CAGTCCGGAGCACAACACAATCTGAACGAACTACGACGCTATATGCAAGACAATCTCTAAATGAAAAAAGATTCTTAGAAAACAATATTCACTTTTAAAACAAAAACGAGATGAAAAAAACAAAGTTTTTCTTGTTGGGACTTGCTGCCCTTGCTATGACAGCTTGTAACAAAGACAACGAGGCAGAACCCGTTACAGAAGGTAATGCCACCATCAGCGTGGTATTGAAGACCAGCAATCCGAATCGTGCTTTTGGAAATGCGGAAGACGAATCAAAGGTGGCTAAGTTGACCGTAATGGTTTATAATGGAGAACAGCAGGAAGCCATCGAATCAGTCGAAAATGCGACTAAGGTTGAAAACATCAAATGTAGTGCAGGCCAACGTACGCTGGTCGTAA…	2	0	2	6				4.5	12	47	2748.2	1356.7	6								43														47
47			1	70			2	CAGCCCGGAGCACAACACAATCTGAACGAACTGCGACGCTATATGCAAGACAATCTCTAAATGAAAAAAGATTCTTAGAAAACAATATTCACTTTTAAAACAAAAACGAGATGAAAAAAACAAAGTTTTTCTTGTTGGGACTTGCTGCTCTTGCTATGACAGCTTGTAACAAAGACAACGAGGCAGAACCCGTTACAGAAGGTAATGCTACCATCAGCGTGGTATTGAAGACCAGCAATCCGAATCGTGCTTTTGGAGAAGACGAATCAAAGGTGGCTAAGTTGACCGTAATGGTTTATAATGGAGAACAGCAGGAAGCCATCAAATCAGCCGAAAATGCGACTAAGGTTGAAGACATCAAATGTAGTGCAGGCCAACGTACGCTGGTCGTAATGGCCA…	2	1	0	5				3.2	8	0	1110.7	0	5							70														0
48			0	76			2	GCCCGGAGCACAACACAATCTGAACGAACTGCGACGCTATATGCAAGACAATCTCTAAATGGAAAAAGATTCTTAGAAAACAATATTCACTTTTAAAACAAAAACGAGATGAAAAAAACAAAGTTTTTCTTGTTGGGACTTGCTGCTCTTGCTATGACAGCTTGTAACAAAGACAACGAGGCAGAACCTGTTACAGAAGGTAATGCTACCATCAGCGTGGTATTGAAGACCAGCAATCCGAATCGTGCTTTTGGAAATGCGGGAGACGAAGCAAAAGTGGCTAAGTTGACCGTAATGGTTTACAAGGGTGAACAGCAGGAAGCCATCAAATCAGCCGAAAATGCGACTAAGGTTGAAAACATCAAATGTAGTGCAGGCCAACGTACGCTGGTCGTAATG…	3	1	0	7	or 2			2.7	8	22	1335.2	253.7	7									76														22
49			0	63			1	GGAGCACAACACAATCTGAACGAACTACGACGCTATATGCAAGACAATCTCTAAATGGGAAAAGATTAGATTCTTAGAAAACAATATTCACTTTTAAAACAAAAATGAGATGAAAAAAACAAAGTTTTTCTTGTTGGGACTTGCTGCTCTTGCTATGACAGCTTGTAACAAAGACAACGAGGCAGAACCCGTTACAGAAGGTAATGCCACCATCAGCGTGGTATTGAAGACCAGCAATTCGAATCGTGCTTTTGGAGTTGGCGAAGACGAATCAAAGGTGGCTAAGTTGACCGTAATGGTTTATAATGGAGAACAGCAGGAAGCCATCAAATCAGCCGAAAATGCGACTAAGGTTGAAGACATCAAATGTAGTGCAGGCCAACGTACGCTGGTCGTAAT…	2	0	2	6				3.7	10	68	2424.9	1134.1	6								63														68
50							1	AAATGATCCTCTTGATAACAAGCGTGTATATGCTCCCATGGCTTTCACCGAATCTAAGAGTGCAGATGACCCAGTCTTATGCGAAGCAAATACAATTTTGCCCCCCGAAAACAACTATGCACTTGTGGCTAAAAAGGAATCTAATCTATTCGGTGCTTCATTGGGCAAATAATGATGATGCTTATTTTGACTGGTTCTTTGACGAATTTCAACGGGGCTTATTCCCCCTGCAAACTATACTCCATGGTTGACTGGGTGGGGAAAAAAACTACACAGAGCCCTTCCCAATAATGCTCCCACAAGGTTTTCTATGTTTTTAGGAGAACACAATACCCCTCAAGAAAGGCAAATCTACGTTCCTAACTATTCTATGGTGGTAAAAAGGG	2	0	1	6									6
51			0	41			2	GCCAGTCCGGAGCACAACACAATCTGAACGAACTACGACGCTATATGCAAGACAATCTCTAAATGGGAAAAGATTAGATTCTTAGAAAACAATATTCACTTTTAAAACAAAAACGAGATGAAAAAAACAAAGTTTTTCTTGTTGGGACTTGCTGCTCTTGCTATGACAGCTTGTAACAAAGACAACGAGGCAGAACCCGTTACAGAAGGTAATGCTACCATCAGCGTGGTATTGAAGACCAGCAATCCGAATCGTGCTTTTGGAGTTGGCGATGACGAATCAAAGGTGGCTAAGTTGACCGTAATGGTTTATAATGGAGAACAGCAGGAAGCCATCAAATCAGCCGAAAATGCGACTAAGGTTGAAGACATCAAATGTAGTGCAGGCCAACGTACGCTG…	1	2	0	1	1b in PCR			2.8	7	88	1468.8	810.3	1			41														88
52							1	GATGAGCCAGTCTTATGCAAACAAATCCAATTTTGCCCCCAAAACCATCTATGCCCTTGTGGCTAAAAAGGAGTCTAATCTATTCGGTGCTTCATTGGCAAATAGTGATGATGGCTTATTTGACTGGGTTCTTTGACGAATTTCAACGGTGCTTATTCCTCCTGCAAACATATA	2	1	0	5									5
53			0	63			1	TCAGCGTGGTATTGAAGACCAGCAATCCGAATCGTGCTTTTGGAGAAGACGAATCAAAGGTGGCTAAGTTGACCGTAATGGTTTATAATGGAGAACAGCAGGAAGCCATCGAATCAGTCGAAAATGCGACTAAGGTTGAAAACATCAAATGTAGTGCAGGCCAGCGTACGCTGGTCGTAATGGCCAATACGGGTGAAATGAAATTGGCTGGCAAGACTCTTGCAGAGGTAAAAGCATTGACAACTGAACTGACTGCAGAAAACCAAGGGGCTGCAGGGTTGATCATGACAGCAGAGCCTGTTGTGGTAACACTTGTCGCCGGCAATAACTATTATGGTTATGATGGAACTCAGGGAGGTAATCAGATTTCGCAAAATACTCCTCTTGAAATCAAACGTG…	2	1	0	5				2.4	13	46	1380.2	451.7	5							63														46
54			1	68			2	GCCCGGAGCACAACACAATCTGAACGAACTACGACGCTTATGCAAGACAATCTCTAAATGGGAAAAGATTAGATTCTTAGAAAACAATATTCACTTCTTAAAACAAAAACGAGATGAAAAAAACAAAGTTTTTCTTCGTTGGGACTTGCTGCTCTTGCTATGACAGCTTGTAACAAAGACAACGAGGCAGAACCTGTTACAGAAGGTAATGCTACCATCAGCGTGGTATTGAAGACCAGCAATCCGAATCGTGCTTTTGGAAATGCGGGAGACGAAGCAAAAGTGGCTAAGTTGACCGTAATGGTTTACAAGGGTGAACAGCAGGAAGCCATCAAATCAGCCGAAAATGCGACTAAGGTTGAAAACATCAAATGTAGTGCAGGCCAACGTACGCTGGTC…	3	2	0	7				2.7	9	14	1500.4	430.1	7									68														14
55							1	ATGCCACCATCAGCGTGGTATTGAAGACCAGCAATCCGAATCGTGCTTTTGGAAATGCGGAAGACGAATCAAAGGTGGCTAAGTTGACCGTAATGGTTTATAATGGAGAACAGCAGGAAGCCATCGAATCAGTCGAAAATGCGACTAAGGTTGAAAACATCAAATGTAGTGCAGGCCAACGTACGCTGGTCGTAATGGCCAATACGGGTGAAATGAAATTGGCTGGCAAGACTCTTGCAGAGGTAAAAGCATTGACAACTGAACTGACTGCAGAAAACCAAGAGGCTGCAGGGTTGATCATGACAGCAGAGCCAAAAACAATCGTTTTGAAGGCAGGCAAGAACTACATTGGATACAGTGGAACCGGAGAGGGTAATCACATTGAGAATGATGCTCTTA…	2	0	1	6									6
56			1	80			2	AAAAGCATTTGACAACTGAACTGACTGCAGAAAACCAAGAGGCTACAGGTTTGATCATGACAGCAGAGCCTGTTGACGTAACACTTTGTCGCCGGCAATAACTATTATGGTTATGATGGATCTCAGGGAGGTAATCAGATTTCGCAAGATACTCCTCTTGAAATCAAACGTGTTCATGCTCGCATGGCTTTCACCGAAATTAAAGTGCAAATGAGCCAGTCTTATGTGAACAAATACAATTCTTGCCCCCGAAAACATCTATGCACTTGTGGCTAAAAAAGGAGTCTAATCTATTCGGTGCTTCATTGGCAAATAGTGATGATGCTTATTTGACTGGTTCTTTGACGAATTTCAGCGGTGCTTATACCCCTGCAACTATACTCATGTTGACTGGTTTGG…	2	1	0	5				2.9	8	21	1132.3	231.1	5							80														21
57			0	66			2	GTCCGGAGCACAACACAATCTGAACGAACTACGACGCTATATGCAAGACAATCTCTAAATGAAAAAAGATTCTTAGAAAACAATATTCACTTTTAAAACAAAAACGAGATGAAAAAAACAAAGTTTTTCTTGTTGGGACTTGCTGCCCTTGCTATGACAGCTTGTAACAAAGACAACGAGGCAGAACCCGTTACAGAAGGTAATGCCACCATCAGCGTGGTATTGAAGACCAGCAATCCGAATCGTGCTTTTGGAAATGCGGAAGACGAATCAAAGGTGGCTAAGTTGACCGTAATGGTTTATAATGGAGAACAGCAGGAAGCCATCGAATCAGTCGAAAATGCGACTAAGGTTGAAAACATCAAATGTAGTGCAGGCCAACGTACGCTGGTCGTAATG…	2	2	0	5				2.9	8	17	1582.1	213.4	5							66														17
58			0	68			2	CACAATCTGAACGAACTGCGACGCTATATGCAAGACAATCTCTAAATGGGAAAAGATTCTTAGAAAACAATATTCACTTTTAAAACAAAAACGAGATGAAAAAAACAAAGTTTTTCTTGTTGGGACTTGCTGCTCTTGCTATGACAGCTTGTAACAAAGACAACGAGGCAGAACCCGTTGTAGAAACTAACGCTACTGTTAGTTTCATAATTAAGAGCGGTGAGAGCCGCGCTGTAGGCGATGACCTTACAGATGCTAAGATCACAAAGCTCACCGCCATGGTCTATGCAGGTCAAGTTCAAGAAGGTATTAAGACAGTGGAAGAGGACGGCGGAGTCCTTAAAGTAGAAGGAATTCCGTGTAAATCTGGAGCCAACCGTGTCCTCGTCGTTGTAGCCA…	4	0	2	10				2.6	6	52	1395.2	519.1	10												68														52
59							2	GCCCGGAGCACAACACAATCTGAACGAACTGCGACGCTATATGCAAGACAATCTCTAAATGGGAAAAGATTCTTAGAAAACAATATTCACTTTTAAAACAAAAACGAGATGAAAAAAACAAAGTTTTTCTTGTTGGGACTTGCTGCTCTTGCTATGACAGCTTGTAACAAAGACAACGAGGCAGAACCCGTTGTAGAAACTAACGCTACTGTTAGTTTCATAATTAAGAGCGGTGAGAGCCGCGCTGTAGGCGATGACCTTACAGATGCTAAGATCACAAAGCTCACCGCCATGGTCTATGCAGGTCAAGTTCAAGAAGGTATTAAGACAGTGGAAGAGGACGGCGGAGTCCTTAAAGTAGAAGGAATTCCGTGTAAATCTGGAGCCAACCGTGTCCTC…	4	2	0	9									9
60			0	68			1	GCCGTCCCGCCCTCATGGTCAGTGCGGAGCAAACACATCTGAACGAAATGCGACGCTATATGCAAGACAATCTCTAAATGGAAAAAGATTCGTTTAAAACATATTCAATTTTATTACATAAAAGAGATGAAATGACCGAGTTTTTCTTGTTGGGACTTGATGCGCTGGCCTTGACATGTTGTATTGAAGACAACAAGGCAAAACCCATTACGTAACGTAATGCCACGCTCACCTTGGCATGGAATACCAGACCACCGAATCGAGCTTTGGGATTGGGCGAGGACGAATCAAAGGTGGCTAGGTTGACCTGAATGGTTTGGTTTGTAAAACAGAACGAAGCGATCCCATCAACCGAAACTGCAATGAAAGTTGAGTACATCACATGTAATGCAGGGCAAG…	1	0	2	2				3.5	8	99	1795.5	1310.3	3					68														99
61			0	70			1	CGTGGTATTGAAGAACCAGCAATTCCGAATCGTGCTTTTTGGAAATGCGGAAGACGAATCAAAGGTGGCTAAGTTTGACCGTAATAGGTTTATAATGGAGAACAGCAGGAAGCCATCGAATCAGTCGAAAATGCGACTAAGGTTGAAAACATCAAATGTAGTGCAGGCCAACGTACGCTGGTCGTAATGGCCAATACGGGTGAAATGAAATTGGCTGGCAAGACTCTTGCAGAGGTAAAAGCATTCGACAACTGAACTGACTGCAGAAAACCAAGAGGCTGCAGGGTTGATCATGACAGCAGAGCCAAAAACAATCGTTTTGAAGGCAGGCAAGAACTACATTGGATACAGTGGAACCGGAGAGGGTAATCACATTGAGAATGATGCTCTTAAGATCAA…	2	0	0					2.6	7	22	1344.4	344.2	0		70														22
62			0	65			2	GCCACCATCAGCGTGGTATTGAAGACCAGCAATCCGAATCGTGCTTTTGGAGATGCGGAAGACGAATCAAAGGTGGCTAAGTTGACCGTAATGGTTTATAATGGAGAACAGCAGGAAGCCATCAAATCAGCCGAAAATGCGACTAAGGTTGAAAACATCAAATGTAGTGCAGGCCAACGTACGCTGGTCGTAATGGCCAATACGGGTGCAATGGAACTGGTTGGCAAGACTCTTGCAGAGGTAAAAGCATTGACAACTGAACTGACTGAAGAAAACCAAGAGGCTGCAGGGTTGATCATGACAGCAGAGCCAAAAACAATCGTTTTGAAGGCAGGCAAGAACTACATTGGATACAGTGGAAACGGAGAGGGTAATCACATTGAGAATGCTCCTCTTAAG…	1b	1	0	3				2.5	9	28	1314	218.1	2				65														28
63			0	56			2	CATCAGCGTGGTATTGAAGACCAGCAATCCGAATCGTGCTTTTGGAGTTGGCGAAGACGAATCAAAGGTGGCTAAGTTGACCGTAATGGTTTATAATGGAGAACAGCAGGAAGCCATCAAATCAGCCGAAAATGCGACTAAGGTTGAAGACATCAAATGTAGTGCAGGCCAACGTACGCTGGTCGTAATGGCCAATACGGGTGCAATGGAACTGGTTGGCAAGACTCTTGCAGAGGTAAAAGCATTGACAACTGAACTGACTGCAGAAAATCAAGAGGCTGCAGGTTTGATCATGACAGCAGAGCCAAAAACAATCGTTTTGAAGGCAGGCAAGAACTACATTGGATACAGTGGAAACGGAGAGGGTAATCACATTGAGAATGATCCTCTTAAAATCAA…	1b	0	1	4	53K-R8/75K-R2			2.9	8	53	1602.4	609.4	4						56														53
64			1	58			1	GTGGTATTGAAGAACCAGCAATTCCGAATCGTGCTTTTGGAAATGCGGAAGAACGAATCAAAGGTGGCTAAGTTTGACCGTAATAGGTTTATAATAGGAGAACAGCAGGAAGCCATCGAATCAGTCGAAAATGCGACTAAGGTTGAAAACATCAAATGTAGTGCAGGCCAACGTACGCTGGTCGTAATGGCCAATACGGGTGAAATGAAATTGGCTGGCAAGACTCTTGCAGAGGTAAAAGCATTGACAACTGAACTGACTGCAGAAAACCAAGAGGCTGCAGGGTTGATCATGACAGCAGAGCCAAAAACAATCGTTTTGAAGGCAGGCAAGAACTACATTGGATACAGTGGAACCGGAGAGGGTAATCACATTGAGAATGATGCTCTTAAGATCAAG…	2	0	0					5	13	48	1373.7	762.7	0		58														48
65							0			0	1										0
66			0	60			2	GCCACCATCAGCGTGGTATTGAAGACCAGCAATCCGAATCGTGCTTTTGGAAATGCGGGAGACGAAGCAAAAGTGGCTAAACTGACCGTAATGGTTTATAATGGAGAACAGCAGGAAGCCATCAAATCAGCCGAAAATGCGACTAAGGTTGAAGACATCAAATGTAGTGCAGGCCAACGTACGCTGGTCGTAATGGCCAATACGGGTGCAATGGAACTGGTTGGCAAGACTCTTGCAGAGGTAAAAGCATTGACAACTGAACTGACTGCAGAAAACCAAGAGGCTGCAGGGTTGATCATGACAGCAGAGCCAAAAACAATCGTTTTGAAGGCAGGCAAGAACTACATTGGATACAGTGGAACCGGAGAGGGTAATCACATTGAGAATGATCCTCTTAAG…	2	2	0	5				2.3	5	23	1301.4	243.4	5							60														23
67							1	CCACCATCAGCGTGGTATTGAAGACCAGCAATCCGAATCGTAGCTTTTGGAGTTGGCGATGACGAATCAAAGGTGGCTAAGTTGACCGTAATGGTTTATAATGGAGAACAGCAGGAAGCCATCAAATCAGCCGAAAATGCGACTAAGGTTGAAGACATCAAATGTAGTGCAGGCCAACGTACGCTGGTCGTAATGGCCAATACGGGTGCAATGGAACTGGTTGGCAAGACTCTTGCAGAGGTAAAAGCATTGACAACTGAACTGACTGCAGAAAATCAAGAGGCTGCAGGTTTGATCATGACAGCAGAGCC	1b	0	0										0
68							1	GCTACTGTTAGTTTCATAATTAAGAGCGGAGAGGGGCGTGCTGTAGGCGATGGCCTTGCAGATGCCAAGATCACAAAACTCACCGCCATGGTCTATGCAGGTCAAATTCAAGAAGGGATTAAGACAGTGGAAGAGGCCGACGGAGTTCTTAAAGTAGAAGGAATTCCGTGTAAATCAGGAGCCAACCGTGTCCTCGTCGTTGTAGCTAATCACAATTATGAGCTTACCGGTAAAAGTTTGAATGAGGTTGAGGCCTTGACGACTTCTTTGACAGCTGAAAACCAAAATGCCAAAAACTTGATCATGACAGGTAAGTCAGCAGCTTTTACAATCAAGCCGGGCTCCAACCACTATGGCTATCCTGATGGGACTACATCCGACAACCTTGTTTCTGCTGGA…	4	0	0										0
69							2	GTGAGAGCCGCGCTGTAGGCGATGACCTTACAGATGCTAAGATCACAAAGCTCACCGCCATGGTCTATGCAGGTCAAGTTCAAGAAGGTATTAAGACAGTGGAAGAGGACGGCGGAGTCCTTAAAGTAGAAGGAATTCCGTGTAAATCTGGAGCCAACCGTGTCCTCGTCGTTGTAGCCAATCACAATTATGAGCTTACCGGTAAAAGTTTGAATGAGGTTGAGGCCTTGACGACTTCTTTGACAGCTGAAAACCAAAATGCCAAAAACTTGATCATGACAGGTAAGTCAGCAGCTTTTACAATCAAACCGGGCTCCAACCACTATGGCTATCCTGGTGGGACTGCATCCGACAACCTTGTTTCTGCTGGAACTCCTCTTGCCGTTACTCGCGTGCATG…	4	0	2	10									10
70							2	ATGCTACCATCAGCGTGGTATTGAAGACCAGCAATCCGAATCGTGCTTTTGGAGTTGGCGATGACGAATCAAAGGTGGCTAAGTTGACCGTAATGGTTTATAATGGAGAACAGCAGGAAGCCATCAAATCAGCCGAAAATGCGACTAAGGTTGAAGACATCAAATGTAGTGCAGGCCAACGTACGCTGGTCGTAATGGCCAATACGGGTGCAATGGAACTGGTTGGCAAGACTCTTGCAGAGGTAAAAGCATTGACAACTGAACTGACTGCAGAAAATCAAGAGGCTGCAGGTTTGATCATGACAGCAGAGCCAAAAACAATCGTTTTGAAGGCAGGCAAGAACTACATTGGATACAGTGGAAACGGAGAGGGTAATCACATTGAGAATGATCCTCTTA…	1b	0	2	4									4
71			0	61			2	ATGCTACCATCAGCGTGGTATTGAAGACCAGCAATCCGAATCGTGCTTTTGGAGTTGGCGATGACGAATCAAAGGTGGCTAAGTTGACCGTAATGGTTTATAATGGAGAACAGCAGGAAGCCATCAAATCAGCCGAAAATGCGACTAAGGTTGAAGACATCAAATGTAGTGCAGGCCAACGTACGCTGGTCGTAATGGCCAATACGGGTGCAATGGAACTGGTTGGCAAGACTCTTGCAGAGGTAAAAGCATTGACAACTGAACTGACTGCAGAAAATCAAGAGGCTGCAGGTTTGATCATGACAGCAGAGCCAAAAACAATCGTTTTGAAGGCAGGCAAGAACTACATTGGATACAGTGGAAACGGAGAGGGTAATCACATTGAGAATGATCCTCTTA…	1b	2	0	3				2.6	8	25	1542.4	430	2				61														25
72							2	ATGCCACCATCAGCGTGGTATTGAAGACCAGCAATCCGAATCGTGCTTTTGGAGTTGGCGATGACGAATCAAAGGTGGCTAAGTTGACCGTAATGGTTTATAATGGAGAACAGCAGGAAGCCATCAAATCAGCCGAAAATGCGACTAAGGTTGAAGACATCAAATGTAGTGCAGGCCAACGTACGCTGGTCGTAATGGCCAATACGGGTGCAATGGAACTGGTTGGCAAGACTCTTGCAGAGGTAAAAGCATTGACAACTGAACTGACTGCAGAAAATCAAGAGGCTGCAGGTTTGATCATGACAGCAGAGCCAAAAACAATCGTTTTGAAGGCAGGCAAGAACTACATTGGATACAGTGGAAACGGAGAGGGTAATCACATTGAGAATGATCCTCTTA…	1b	2	0	3									2
73			1	42			2	GAGAACAGCAGGAAGCCATCAAATCAGCCGAAAATGCGACTAAGGTTGAAGACATCAAATGTAGTGCAGGCCAACGTACGCTGGTCGTAATGGCCAATACGGGTGCAATGGAACTGGTTGGCAAGACTCTTGCAGAGGTAAAAGCATTGACAACTGAACTGACTGCAGAAAATCAAGAGGCTGCAGGTTTGATCATGACAGCAGAGCCAAAAACAATCGTTTTGAAGGCAGGCAAGAACTACATTGGATACAGTGGAAACGGAGAGGGTAATCACATTGAGAATGATCCTCTTAAAATCAAGCGTGTACATGCTCGCATGGCTTTCACCGAAATTAAAGTGCAGATGAGCGCAGCTTACGATAACATTTACACATTCGTCCCTGAAAAGATTTATGGTC…	1b	0	1	4				2.2	5	79	1192.5	594.8	4						42														79
74			1	62			2	AGTCAAAGGTTGGTCTGTCTGAGCGTAGTCGGTCCATCGTCGGAGAGGAGCAGGAGGCCATCAAATCAGCCGAGAACGCGACTAGGGTTCGAGGAGATCAAATGTAGTGCAGGCCAACGTACGCTGGTCGTAACGGCCAACACGGGTGCAACGGAACCGGCCGGCAAGACTCTTGCAGCGGTAAAAGCACCGACAACCGAACCGACTGCAGAAAATCAAGAGGCCGCAGGTTTCGATCATGACAGCAGAGCCAAAAACAATCGTTTTCGAAGGCAGGCAAGAGCTACACCGGATACAGTGGAAACGGAGAGGGTAATCACATTCGAGAACGATCCTCTTAAAATCAAGCGTGTACACGCTCGCATGGCTTTTCACCGAAATTAAAGTTGCAGATTGAGG…	1b	0	2	4	53K-R8/75K-R2			3.2	9	20	1571.7	256.1	4						62														20
75			0	75			2	GTATGCTACCATCAGCGTGGTTTTGAAGACCAGCAATCCGAATCGTGCTTTTGGAGAAGACGAATCAAAGGTGGCTAAGTTGACCGTAATGGTTTATAATGGAGAACAGCAGGAAGCCATCAAATCAGCCGAAAATGCGACTAAGGTTGAAGACATCAAATGTAGTGCAGGCCAACGTACGCTGGTCGTAATGGCCAATACGGGTGCAATGGAACTGGTTGGCAAGACTCTTGCAGAGGTAAAAGCATTGACAACTGAACTGACTGCAGAAAACCAAGAGGCTACAGGTTTGATCATGACAGCAGAGCCTGTTGACGTAACACTTGTCGCCGGCAATAACTATTATGGTTATGATGGATCTCAGGGAGGTAATCAGATTTCGCAAGATACTCCTCTTGA…	2	0	2	6	53K-R8/75K-R2			3.2	8	46	1568.8	501.5	6								75														46
76							2	AATGCCACCATTCAGCGTGGTATTTCGAAGAACGCAGCAATTTCCGAATTCGTGCTTTTTTTTGGAAGTTTGGCGATGACGAATCAAAGGTTGGCTTAAGTTTTGACCGTAATTGGTTTATAATGGAGAACAGCAGGAAGCCATCAAATCAGCCGAAAATGCGACTAAGGTTGAAGACATCAAATGTAGTGCAGGCCAACGTACGCTGGTCGTAATGGCCAATACGGGTGCAATGGAACTGGTTGGCAAGACTCTTGCAGAGGTAAAAGCATTGACAACTGAACTGACTGCAGAAAACCAAGAGGCTGCAGGGTTGATCATGACAGCAGAGCCAAAAACAATCGTTTTGAAGGCAGGCAAGAACTACATTGGATACAGTGGAACCGGAGAGGGTAATCA…	2	0	0		53K-R8/75K-R2								0
77			0	76			0			0	0		53K-R8/75K-R2			4	9	31	1097.3	426.6	0		76														31
78			0	71			2	GCTACCATCAGCGTGGTATTGAAGACCAGCAATCCGAATCGTGCTTTTGGAAATGCGGGAGACGAAGCAAAAGTGGCTAAACTGACCGTAATGGTTTATAATGGAGAACAGCAGGAAGCCATCAAATCAGCCGAAAATGCGACTAAGGTTGAAGACATCAAATGTAGTGCAGGCCAACGTACGCTGGTCGTAATGGCCAATACGGGTGAAATGAAATTGGCTGGCAAGACTCTTGCAGAGGTAAAAGCATTGACAACTGAACTGACTGAAGGAAACCAAGAGGCTGCAGGGTTGATCATGACAGCAGAGCCTGTTGAGGTAACACTTGTCGCCGGCAATAACTATTATGGTTATGATGGATCTCAGGGAGGTAATCAGATTTCGCAAGATACTCCTCTT…	2	0	1	6	53K-R8/75K-R2			2	5	21	997.7	132	6								71														21
79			1	58			2	CGTGGTTTTGAAGAACCAGCAATCCGAATCGTGCTTTTGGAGAAGAACGAATCAAAGGTGGCTAAGTTCGACCGTAATGGTTTATAATGGAGAACAGCAGGAAGCCATCAAATCAGCCGAAAATGCGACTAAGGTTGAAGACATCAAATGTAGTGCAGGCCAACGTACGCTGGTCGTAATGGCCAATACGGGTGCAATGGAACTGGTTGGCAAGACTCTTGCAGAGGTAAAAGCATTGACAACTGAACTGACTGCAGAAAACCAAGAGGCTACAGGTTTGATCATGACAGCAGAGCCTGTTGACGTAACACTTGTCGCCGGCAATAACTATTATGGTTATGATGGATCTCAGGGAGGTAATCAGATTTCGCAAGATACTCCTCTTGAAATCAAACGTGT…	2	0	2	6	53K-R8/75K-R2			4.1	8	151	2419.1	2006.2	6								58														151
80			0	71			1	GTGGTTTTGAAGACCAGCAATCCGAATCGTGCTTTTGGAGAAGACGAATCAAAGGTGGCTAAGTTGACCGTAATGGTTTATAATGGAGAACAGCAGGAAGCCATCAAATCAGCCGAAAATGCGACTAAGGTTGAAGACATCAAATGTAGTGCAGGCCAACGTACGCTGGTCGTAATGGCCAATACGGGTGCAATGGAACTGGTTGGCAAGACTCTTGCAGAGGTAAAAGCATTGACAACTGAACTGACTGCAGAAAATCAAGAGGCTGCAGGTTTGATCATGACAGCAGAGCCAAAAACAATCGTTTTGAAGGCAGGCAAGAACTACATTGGATACAGTGGAAGCGGAGAGGGTAATCACATTGAGAATGATCCTCTTAAGATCAAGCGTGTACATGCT…	2	0	0		53K-R8/75K-R2			1.9	5	4	835.2	42.5	0		71														4
81							2	CATCAGCGTGGTATTGAAGACCAGCAATTCGAATCGTGCTTTTGGAGTTGGCGATGACGAATCAAAGGTGGCTAAGTTGACCGTAATGGTTTATAATGGAGAACAGCAGGAAGCCATCAAATCAGCCGAAAATGCGACTAAGGTTGAAGACATCAAATGTAGTGCAGGCCAACGTACGCTGGTCGTAATGGCCAATACGGGTGCAATGGAACTGGTTGGCAAGACTCTTGCAGAGGTAAAAGCATTGACAACTGAACTGACTGCAGAAAACCAAGAGGCTGCAGGGTTGATCATGACAGCAGAGCCAAAAACAATCGTTTTGAAGGCAGGCAAGAACTACATTGGATACAGTGGAACCGGAGAGGGTAATCACATTGAGAATGATCCTCTTAAGATCAA…	1	2	0	1	53K-R8/75K-R2								1
82			1	50			1	GCGTGGTTTTGAAGACCAGCAATCCGAATCGTGCTTTTGGAGAAGACGAATCAAAGGTGGCTAAGTTGACCGTAATGGTTTATAATGGAGAACAGCAGGAAGCCATCAAATCAGCCGAAAATGCGACTAAGGTTGAAGACATCAAATGTAGTGCAGGCCAACGTACGCTGGTCGTAATGGCCAATACGGGTGCAATGGAACTGGTTGGCAAGACTCTTGCAGAGGTAAAAGCATTGACAACTGAACTGACTGCAGAAAACCAAGAGGCTACAGGTTTGATCATGACAGCAGAGCCTGTTGACGTAACACTTGTCGCCGGCAATAACTATTATGGTTATGATGGATCTCAGGGAGGTAATCAGATTTCGCAAGATACTCCTCTTGAAATCAAACGTGTTC…	2	0	1	6	53K-R8/75K-R2			3.1	10	29	1649.4	543.2	6								50														29
83			0	73			0			0	0		53K-R8/75K-R2			3.4	12	72	1988.5	1122.5	0		73														72
84			0	73			0			0	0		53K-R8/75K-R2			3.2	8	54	1586.9	769.4	0		73														54
85							1	CACCATCAGCGTGGTATTGAAGACCAGCAATCCGAATCGTGCTTTTGGAAATGCGGGAGACGAAGCAAAAGTGGCTAAACTGACCGTAATGGTTTATAATGGAGAACAGCAGGAAGCCATCAAATCAGCCGAAAATGCGACTAAGGTTGAAGACATCAAATGTAGTGCAGGCCAACGTACGCTGGTCGTAATGGCCAATACGGGTGCAATGGAACTGGTTGGCAAGACTCTTGCAGAGGTAAAAGCATTGACAACTGAACTGACTGCAGAAAACCAAGAGGCTGCAGGGTTGATCATGACAGCAGAGCCAAAAACAATCGTTTTGAAGGCAGGCAAGAACTACATTGGATACAGTGGAACCGGAGAGGGTAATCACATTGAGAATGATCCTCTTAAGAT…	2	0	1	6	53K-R8/75K-R2								6
86			1	43			1	GCTTCACGAAAGGTTTTTGCCACCATCAGCGTGGTATTGAAGACCAGCAATTCGAATCGTGCTTTTGGAGTTGGTGATGACAGAATCAAAGGTGGCTAAGTTGACCGTAATGGTCTTATAATGGAGAACAGCAGGAAGCCATCAAATCAGCCGAAAATGCGACTAAGGTTGAAGACATCAAATGTAGTGCAGGCCAACGTACGCTGGTCGTAATGGCCAATACGGGTGCAATGGAACTGGTTGGCAAGACTCTTGCAGAGGTAAAAGCATTGACAACTGAACTGACTGCAGAAAACCAAGAGGCTGCAGGGTTGATCATGACAGCAGAGCCAAAAACAATCGTTTTGAAGGCAGGCAAGAACTACATTGGATACAGTGGAACCGGAGAGGGTAATCACA…	2	1	0	5	53K-R8/75K-R2			6.5	10	192	4387.7	4387.7	5							43														192
87			1	67			0			0	0		53K-R8/75K-R2			2.4	10	44	1231.8	337.9	0		67														44
88			1	60			1	CGTGGTATTGAAGACCAGCAATCCGAATCGTGCTTTTGGAGAACGACGAATCAAAGGTGGCTAAGTTGACCGTAATGGTTTATAACCGGAGAACAGCAGGAAGCCATCAAATCAGCCGAAAATGCGACTAAGGTTGAAGGCATCAAATGTAGTGCAGGCCAACGTACGCTGGTCGTAATGGCCAATACGGGTGAAATGAAATTGGCTGGCAAGACTCTTGCAGAGGTAAAAGCATTGACAACTGAACTGACTGCAGAAAACCAAGAGGCTGCAGGGTTGATCATGACAGCAGAGCCTGTTGTGGTAACACTTGTCGCCGGCAATAACTATTATGGTTATGATGGATCTCAGGGAGGTAATCAGATTTCGCAAGATACTCCTCTTGAAATCAAACGTGTA…	2	0	1	6	53K-R8/75K-R2			2.7	11	5	1068.9	109.4	6								60														5
89			0	22			0			0	0		53K-R8/75K-R2			4.1	9	32	2554.8	654.4	0		22														32
90			1	38			2	TACCATCAGCGTGGTATTGAAGACCAGCAATCCGAATCGTGCTTTTGGAGTTGGCGATGACGAATCAAAGGTGGCTAAGTTGACCGTAATGGTTTATAATGGAGAACAGCAGGAAGCCATCAAATCAGCCGAAAATGCGACTAAGGTTGAAGACATCAAATGTAGTGCAGGCCAACGTACGCTGGTCGTAATGGCCAATACGGGTGCAATGGAACTGGTTGGCAAGACTCTTGCAGAGGTAAAAGCATTGACAACTGAACTGACTGCAGAAAATCAAGAGGCTGCAGGTTTGATCATGACAGCAGAGCCAAAAACAATCGTTTTGAAGGCAGGCAAGAACTACATTGGATACAGTGGAAACGGAGAGGGTAATCACATTGAGAATGATCCTCTTAAAAT…	1b	2	0	3	53K-R8/75K-R2			3.3	5	0	450.7	0	2				38														0
91							0			1	0		53K-R8/75K-R2								0
92			1	61			2	GCGTGGTATTGAAGAACCAGCAATCCCGAATCGTGCTTTTGGAAATGCGGGAGACGAAGCAAAAGTGGCTAAACTCGACCGTAATGGTTTATAATGGAGAACAGCAGGAAGCCATCAAATCAGCCGAAAATGCGACTAAGGTTGAAGACATCAAATGTAGTGCAGGCCAACGTACGCTGGTCGTAATGGCCAATACGGGTGAAATGAAATTGGCTGGCAAGACTCTTGCAGAGGTAAAAGCATTGACAACTGAACTGACTGAAGGAAACCAAGAGGCTGCAGGGTTGATCATGACAGCAGAGCCTGTTGAGGTAACACTTGTCGCCGGCAATAACTATTATGGTTATGATGGATCTCAGGGAGGTAATCAGATTTCGCAAGATACTCCTCTTGAAATCA…	2	0	2	6	53K-R8/75K-R2			3.3	11	27	1795.8	494.2	6								61														27
93			1	68			0			0	0		53K-R8/75K-R2			3	10	9	1982.6	291.6	0		68														9
94			0	78			2	GCCACCATCCAGCGTGGTATTGAAGAACCAGCAATTTCGAATCGTGCTTTTGGAGTTGGCGATGACGAATCAAAGGTGGCTAAGTTGACCGTAATGGTTTATAATGGAGAACAGCAGGAAGCCATCAAATCAGCCGAAAATGCGACTAAGGTTGAAGACATCAAATGTAGTGCAGGCCAACGTACGCTGGTCGTAATGGCCAATACGGGTGCAATGGAACTGGTTGGCAAGACTCTTGCAGAGGTAAAAGCATTGACAACTGAACTGACTGCAGAAAACCAAGAGGCTGCAGGGTTGATCATGACAGCAGAGCCAAAAACAATCGTTTTGAAGGCAGGCAAGAACTACATTGGATACAGTGGAACCGGAGAGGGTAATCACATTGAGAATGATCCTCTT…	1b	0	2	4	53K-R8/75K-R2			3.4	9	113	1729.9	986.5	4						78														113
95			0	67			0			0	0		53K-R8/75K-R2			3	7	28	1347	355.5	0		67														28
96			0	54			0			0	0		53K-R8/75K-R2			4.3	10	161	2978.7	2900.7	0		54														161
97			0	55			2	GACCGTAATGGTTTATAATGGAGAACAGCAGGAAGCCATCAAATCAGCCGAAAATGCGACTAAGGTTGAAGACATCAAATGTAGTGCAGGCCAACGTACGCTGGTCGTAATGGCCAATACGGGTGCAATGGAACTGGTTGGCAAGACTCTTGCAGAGGTAAAAGCATTGACAACTGAACTGACTGCAGAAAATCAAGAGGCTGCAGGTTTGATCATGACAGCAGAGCCAAAAACAATCGTTTTGAAGGCAGGCAAGAACTACATTGGATACAGTGGAAACGGAGAGGGTAATCACATTGAGAATGATCCTCTTAAAATCAAGCGTGTACATGCTCGCATGGCTTTCACCGAAATTAAAGTGCAGATGAGCGCAGCTTACGATAACATTTACACATTCGT…	1b	2	0	3	53K-R8/75K-R2			3	7	62	1721.4	617.7	2				55														62
98			1	68			0			0	0		53K-R8/75K-R2			2.8	12	51	1669.4	812.1	0		68														51
99			0	56			2	GCCACCATCAGCGTGGTATTGAAGACCAGCAATTCGAATCGTGCTTTTGGAGTTGGCGATGACGAATCAAAGGTGGCTAAGTTGACCGTAATGGTTTATAATGGAGAACAGCAGGAAGCCATCAAATCAGCCGAAAATGCGACTAAGGTTGAAGACATCAAATGTAGTGCAGGCCAACGTACGCTGGTCGTAATGGCCAATACGGGTGCAATGGAACTGGTTGGCAAGACTCTTGCAGAGGTAAAAGCATTGACAACTGAACTGACTGCAGAAAACCAAGAGGCTGCAGGGTTGATCATGACAGCAGAGCCAAAAACAATCGTTTTGAAGGCAGGCAAGAACTACATTGGATACAGTGGAACCGGAGAGGGTAATCACATTGAGAATGATCCTCTTAAG…	2	2	0	5	53K-R8/75K-R2			3.1	12	36	1940.4	804.6	5							56														36
100			1	82			2	CCACCATTCCAGCGTGGTTTTTCGAAGAACCAGCAATTTTCCGAATCCGTGGCTTTTTGGAGTTTGGCGATGACGAATCAAAGGTGGCTAAGTCCGACCGTAATGGTTTATAATGGAGAACAGCAGGAAGCCATCAAATCAGCCGAAAATGCGACTAAGGTTGAAGACATCAAATGTAGTGCAGGCCAACGTACGCTGGTCGTAACGGCCAATACGGGTGCAATGGAACTGGTTGGCAAGACTCTTGCAGAGGTAAAAGCATCGACAACTGAACTGACTGCAGAAAACCAAGAGGCTACAGGTTTGATCATGACAGCAGAGCCTGTTGACGTAACACTTGTCGCCGGCAATAACTATTATGGTTATGATGGATCTCAGGGAGGTAATCAGATTTCGCAA…	2	0	0		53K-R8/75K-R2			3.1	15	37	1795.4	566.7	0		82														37
			81												Mean	3.27531	8.91358	48.4198	1698.67	762.009			60.4839	48	52.6667	66.5	57.25	62.1	59.6111	72		18	68				44.1935	74.5	27	88	69.375	50.7	49.3333	18		27	52
															SD	0.907925	2.58771	41.2496	672.161	792.195			13.6639	7	11.4698	1.5	12.0078	9.9544	8.57735	4							37.3928	13.5	21.0871	11	42.2993	59.5836	39.1961	4
															SEM	0.100881	0.287523	4.58329	74.6846	88.0217			2.4541	4.94975	4.68251	1.06066	4.2454	3.14786	2.0217	2.82843							6.71594	9.54594	8.60878	7.77817	14.9551	18.842	9.23861	2.82843
															Count	81	81	81	81	81			31	2	6	2	8	10	18	2	0	1	1	0	0		31	2	6	2	8	10	18	2	0	1	1	0	0
																												t-test														t-test
																							I+Ib	Mean	51.5		59.1	0.509556									I+Ib	Mean	38.875		73.1	0.944487
																								SD	10.7238		11.3794											SD	28.3215		38.8727
																								SEM	3.79144		3.59847											SEM	10.0132		12.2926
																								Count	8		10											Count	8		10
						0.564535								r =		0.793095									r =		0.800562												r =		0.800562

## Sheet: Data 3
Data 3 Statistical analysis.
	Gender														Age														PPD mean														PPD max
	Untyped	I	Ib	I	Ib	II		III		IV		V			Untyped	I	Ib	I	Ib	II		III		IV		V			Untyped	I	Ib	I	Ib	II		III		IV		V			Untyped	I	Ib	I	Ib	II
	Type	53	53	70	70	53	70	53	70	53	70	53	70		Type	53	53	70	70	53	70	53	70	53	70	53	70		Type	53	53	70	70	53	70	53	70	53	70	53	70		Type	53	53	70	70	53	70
	0	1	2	3	4	5	6	7	8	9	10	11	12		0	1	2	3	4	5	6	7	8	9	10	11	12		0	1	2	3	4	5	6	7	8	9	10	11	12		0	1	2	3	4	5	6
1	0	1	0	0	0	1	1	0		0	0				63	36	65	62	69	76		18	68						2.2	3.8	4.1	3	3.6	2.7		1.8	2.6						10	10	10	10	15	11	10
2	0	0	1	0	0	0	0	1			0				64	61	68	51	63	68									3.8	2.8	3.5	2.2	2.3	2.7									10	7	7	8	8	3	6
3	0		0		0	0	0								70	55	58	70	64										2.5	2.6	6	3.6	3.3										7		9		12	8	7
4	0		0		0	1	0								49	41	38	70	51										2	2.7	4.4	3.2	3.5										6		8		10	8	11
5	0		1		0	0	1								72	65	67	63	59										3.7	2.5	3	2.4	5										6		5		8	13	11
6	0		0		0	1	1								57	61	57	80	66										3.4	2.6	4.6	2.9	3.6										10		7		5	8	11
7	1				1	0	1								73	38	56	66	42										2.5	3.3	2.9	2.9	4										7				9	8	12
8	0				1	0	0								43	55	42	60	61										2.4	3	2.2	2.3	3.5										5				9	5	10
9	1				0	1	1								31		62	43	55										5.7		3.2	6.5	4.3										12					10	12
10	0					0	0								56		78	56	62										2.5		3.4	3.1	3.3										6					12	9
11	0						1								64				43										4.4				4.5										11						12
12	0						0								54				63										3.5				3.7										9						10
13	1						0								62				75										2.9				3.2										7						8
14	1						0								65				71										4.2				2										15						5
15	0						1								31				58										2.1				4.1										3						8
16	0						1								58				50										2.7				3.1										10						10
17	0						1								65				60										3.1				2.7										10						11
18	0						1								49				61										3.4				3.3										6						11
19	0														70														2.6														7
20	1														58														5														13
21	0														76														4														9
22	0														71														1.9														5
23	0														73														3.4														12
24	0														73														3.2														8
25	1														67														2.4														10
26	0														22														4.1														9
27	1														68														3														10
28	0														67														3														7
29	0														54														4.3														10
30	1														68														2.8														12
31	1														82														3.1														15
																Result of Non-repeated Measures ANOVA														Result of Non-repeated Measures ANOVA														Result of Non-repeated Measures ANOVA
																		one-tail P=0.00112155310896753														one-tail P=0.100217370274336														#NUM!
																F=	4.15091	1.91586	P<0.05 significant difference*											F=	1.5021	1.91586	P<0.05 no significant difference											F=	0	#NUM!	#NUM!
																F=	4.15091	2.84896	P<0.01 significant difference**											F=	1.5021	2.84896	P<0.01 no significant difference											F=	0	#NUM!	#NUM!
																		two-tail P=0.00224310621793506														two-tail P=0.200434740548671														#NUM!
																F=	4.15091	2.3185	P<0.05 significant difference*											F=	1.5021	2.3185	P<0.05 no significant difference											F=	0	#NUM!	#NUM!
																F=	4.15091	3.25412	P<0.01 significant difference**											F=	1.5021	3.25412	P<0.01 no significant difference											F=	0	#NUM!	#NUM!
																Result of Kruskal Wallis H-test														Result of Kruskal Wallis H-test
																data within table		#N/A												data within table		#N/A												Result of Kruskal Wallis H-test
																H=	11.8469	#N/A	#N/A											H=	12.744	#N/A	#N/A											data within table		one-tail P=0
																H=	11.8469	#N/A	#N/A											H=	12.744	#N/A	#N/A											H=	-114	#N/A	P<0.05 no significant difference
																		#N/A														#N/A												H=	-114	#N/A	P<0.01 no significant difference
																H=	11.8469	#N/A	#N/A											H=	12.744	#N/A	#N/A													two-tail P=
																H=	11.8469	#N/A	#N/A											H=	12.744	#N/A	#N/A											H=	-114	#N/A	P<0.05 no significant difference
																other data		one-tail P=0.0327358849270341												other data		one-tail P=0.0236428952029286												H=	-114	#N/A	#N/A
																H=	11.8469	10.6446	P<0.05 significant difference*											H=	12.744	10.6446	P<0.05 significant difference*											other data		#NUM!
																H=	11.8469	15.0332	P<0.01 no significant difference											H=	12.744	15.0332	P<0.01 no significant difference											H=	-114	#NUM!	P<0.05 no significant difference
																		two-tail P=0.0654717698540683														two-tail P=0.0472857904058572												H=	-114	#NUM!	P<0.01 no significant difference
																H=	11.8469	12.5916	P<0.05 no significant difference											H=	12.744	12.5916	P<0.05 significant difference*													#NUM!
																H=	11.8469	16.8119	P<0.01 no significant difference											H=	12.744	16.8119	P<0.01 no significant difference											H=	-114	#NUM!	P<0.05 no significant difference
																																												H=	-114	#NUM!	P<0.01 no significant difference
[truncated: 45 more columns]
